# Supplementary material for: TIP-B1 promotes kidney clear cell carcinoma growth and metastasis via EGFR/AKT signaling
Source: publisher site journal article supplement (doi:10.18632/aging.102298), 2019-09-27
Supplement: Supplementary file [file aging-v11i18-102298-supplementary-material-SD3.pdf]

## SUPPLEMENTARY TABLES

Supplementary Table 2. Comparison of baseline clinicopathological characteristics based on TCGA.

|                          | TCGA Cohort(N= 533) |        |      | P       |
|--------------------------|---------------------|--------|------|---------|
|                          | Cases No.           | TIP-B1 |      |         |
|                          |                     | Low    | High |         |
| <b>Age (years)</b>       |                     |        |      |         |
| ≤60                      | 264                 | 161    | 103  | 0.795   |
| >60                      | 269                 | 167    | 102  |         |
| <b>Gender</b>            |                     |        |      |         |
| Male                     | 345                 | 198    | 147  | 0.008   |
| Female                   | 188                 | 130    | 58   |         |
| <b>Laterality</b>        |                     |        |      |         |
| Left                     | 251                 | 147    | 104  | 0.172   |
| Right                    | 281                 | 181    | 100  |         |
| Bilateral                | 1                   | 0      | 1    |         |
| <b>Pathologic stage</b>  |                     |        |      |         |
| Stage i-ii               | 324                 | 238    | 86   | <0.0001 |
| Stage iii-iv             | 207                 | 90     | 117  |         |
| NA                       | 2                   |        |      |         |
| <b>Pathology T stage</b> |                     |        |      |         |
| T1-2                     | 342                 | 245    | 97   | <0.0001 |
| T3-4                     | 191                 | 83     | 108  |         |
| <b>Pathology N stage</b> |                     |        |      |         |
| N(-)                     | 240                 | 146    | 94   | 0.007   |
| N(+)                     | 16                  | 4      | 12   |         |
| NA                       | 277                 |        |      |         |
| <b>Pathology M stage</b> |                     |        |      |         |
| M(-)                     | 422                 | 277    | 145  | <0.0001 |
| M(+)                     | 79                  | 29     | 50   |         |
| NA                       | 32                  |        |      |         |
| <b>Grade</b>             |                     |        |      |         |
| G1-2                     | 242                 | 183    | 59   | <0.0001 |
| G3-4                     | 282                 | 137    | 145  |         |
| NA                       | 1                   |        |      |         |
| <b>Cancer Status</b>     |                     |        |      |         |
| Recurrence(-)            | 356                 | 253    | 103  | <0.0001 |
| Recurrence(+)            | 161                 | 63     | 98   |         |
| NA                       | 16                  |        |      |         |

**Supplementary Table 3. Univariate and multivariate Cox proportional hazards analysis of OS from TCGA cohort.**

| Variables                | OS                  |          |                       |          |
|--------------------------|---------------------|----------|-----------------------|----------|
|                          | Univariate analysis | <i>P</i> | Multivariate analysis | <i>P</i> |
|                          | HR (95%CI)          |          | HR (95%CI)            |          |
| <b>Age (years)</b>       |                     |          |                       |          |
| ≤60                      | 1.000               | <0.204   | NA                    |          |
| >60                      | 1.213(0.900-1.634)  |          |                       |          |
| <b>TIP-B1</b>            |                     |          |                       |          |
| High                     | 1.000               | <0.0001  | 1.000                 | 0.015    |
| Low                      | 0.408(0.302-0.551)  |          | 0.669(0.483-0.926)    |          |
| <b>Gender</b>            |                     |          |                       |          |
| Male                     | 1.000               | 0.737    | NA                    |          |
| Female                   | 1.054(0.775-1.434)  |          |                       |          |
| <b>Pathologic stage</b>  |                     |          |                       |          |
| Stage i-ii               | 1.000               | <0.0001  | 1.000                 | 0.224    |
| Stage iii-iv             | 3.727(2.750-5.050)  |          | 1.546(0.766-3.117)    |          |
| <b>Pathology T stage</b> |                     |          |                       |          |
| T1-2                     | 1.000               | <0.0001  | 1.000                 | 0.853    |
| T3-4                     | 3.138(2.320-4.245)  |          | 1.059(0.580-1.933)    |          |
| <b>Pathology N stage</b> |                     |          |                       |          |
| N(-)                     | 1.000               | <0.0001  | 1.000                 | 0.417    |
| N(+)                     | 3.492(1.857-6.565)  |          | 1.312(0.682-2.524)    |          |
| NA                       | 0.829(0.610-1.126)  |          |                       |          |
| <b>Pathology M stage</b> |                     |          |                       |          |
| M(-)                     | 1.000               | <0.0001  | 1.000                 | 0.016    |
| M(+)                     | 4.464(3.269-6.095)  |          | 1.612 (1.092-2.382)   |          |
| NA                       | 0.913(0.289-2.889)  |          |                       |          |
| <b>Grade</b>             |                     |          |                       |          |
| G1-2                     | 1.000               | <0.0001  | 1.000                 | 0.038    |
| G3-4                     | 2.632(1.874-3.696)  |          | 1.481(1.021-2.147)    |          |
| NA                       | 0.750(0.100-5.260)  |          |                       |          |
| <b>Cancer_Status</b>     |                     |          |                       |          |
| Recurrence(-)            | 1.000               | <0.0001  | 1.000                 | <0.0001  |
| Recurrence(+)            | 4.856(3.528-6.682)  |          | 2.763(1.907-4.003)    |          |
| NA                       | 3.177(1.367-7.384)  |          |                       |          |

**Supplementary Table 4. Sequence of primers for real-time polymerase chain reaction primer.**

| <b>Primer</b> | <b>Sequence (5' to 3')</b> |
|---------------|----------------------------|
| ZO-1-F        | TGCCATTACACGGTCCTCTG       |
| ZO-1-R        | GGTTCTGCCTCATCATTTCCTC     |
| E-Cadherin-F  | GTAGGAAGGCACAGCCTGTC       |
| E-Cadherin-R  | CAGCAAGAGCAGCAGAATCA       |
| N-Cadherin-F  | GAGCATGCCAAGTTCCTGAT       |
| N-Cadherin-R  | TGGCCACTGTGCTTACTGAA       |
| Vimentin-F    | CTGCAGGACTCGGTGGACTT       |
| Vimentin-R    | GAAGCGGTCATTCAGCTCCT       |
| Twist-F       | GAGTCCGCAGTCTTACGAGG       |
| Twist-R       | CTGCCCGTCTGGGAATCACT       |
| Snail-F       | ACCACTATGCCGCGCTCTT        |
| Snail-R       | GGTCGTAGGGCTGCTGGAA        |
| Slug-F        | TGTTGCAGTGAGGGCAAGAA       |
| Slug-R        | GACCCTGGTTGCTTCAAGGA       |
| GAPDH-F       | ACGGATTTGGTCGTATTGGG       |
| GAPDH-R       | TGATTTTGGAGGGATCTCGC       |

**Supplementary Table 5. List of antibodies and reagents used for studies.**

| <b>Name</b>                                      | <b>Supplier</b>           | <b>Catalog</b>    |
|--------------------------------------------------|---------------------------|-------------------|
| TIP-B1                                           | Sigma-Aldrich             | HPA030848         |
| ZO-1                                             | Abcam                     | ab96587           |
| E-Cadherin                                       | Abcam                     | ab40772           |
| N-Cadherin                                       | Abcam                     | ab18203           |
| Vimentin                                         | Abcam                     | ab92547           |
| Twist                                            | Abcam                     | ab49254           |
| Snail                                            | Abcam                     | ab53519           |
| Slug                                             | Abcam                     | ab183760          |
| Total Akt (T-Akt)                                | Cell Signaling Technology | #9272             |
| Phosphorylated Akt (p-Akt)                       | Cell Signaling Technology | #4051             |
| Total ERK(T-ERK)                                 | Cell Signaling Technology | #9102             |
| Phosphorylated ERK(p-ERK)                        | Cell Signaling Technology | #9101             |
| Total p38(T-p38)                                 | Cell Signaling Technology | #9212             |
| Phosphorylated p38(p-p38),                       | Cell Signaling Technology | #4511             |
| EGFR                                             | Cell Signaling Technology | #2232             |
| Phosphorylated EGFR(p-EGFR, at Y992,Y1045,Y1068) | Cell Signaling Technology | #2235/#2237/#2234 |
| GAPDH                                            | Abcam                     | ab9484            |
| MK-2206                                          | Selleck                   | S1078             |
| SC79                                             | Selleck                   | S7863             |
| AG-1478                                          | Selleck                   | S2728             |
| EGF                                              | Sigma-Aldrich             | E9644             |
