# Supplementary material for: TIP-B1 promotes kidney clear cell carcinoma growth and metastasis via EGFR/AKT signaling
Source: Aging (Albany NY). 2019 Sep 27;11(18):7914–37. doi: 10.18632/aging.102298 (PMC6782011; doi:10.18632/aging.102298)
Supplement: Supplementary Table 1 [file aging-11-102298-s001.xlsx]

## Sheet: Sheet1
Supplementary Table 1. TIP-B1-TCGA-expression and ROC detected.
TIP-B1_expression	diagnosis
11.5469	1
10.7847	1
11.0189	1
11.0729	1
11.159	1
11.2269	0
9.5519	0
10.9874	1
10.8715	1
12.3286	1
10.3608	1
10.2664	1
10.8406	1
10.8918	1
10.8623	0
11.1914	1
9.6196	1
10.5942	1
10.6328	1
11.5494	1
11.2039	1
12.5582	0
11.7346	1
11.1312	1
10.8917	1
11.0462	0
11.1386	1
11.4573	1
11.0232	1
10.8938	1
11.5635	1
11.1565	1
10.8401	1
10.8333	1
10.4844	1
10.6681	1
13.0317	1
11.2425	0
11.482	1
11.3962	1
11.2906	1
12.008	1
10.4748	1
11.5843	1
11.8236	1
11.385	1
11.4352	1
11.0499	1
10.5868	1
11.3318	1
10.9951	1
10.9016	1
11.2762	1
12.3386	1
14.6438	0
10.6776	1
11.194	1
11.8324	1
11.516	0
9.4463	1
11.9371	1
12.2878	1
10.0364	1
10.3662	1
11.3516	1
12.1081	1
11.0776	1
11.5573	1
12.9314	1
10.9378	1
11.1753	1
11.708	0
10.8836	1
11.2454	1
11.0097	1
11.2052	1
10.6548	1
10.8797	1
10.844	1
12.1755	0
11.5251	0
13.1819	0
11.259	0
12.5108	0
12.0053	0
13.908	0
14.6743	0
12.5801	0
13.5707	0
11.7141	0
12.4289	0
11.2895	0
12.3118	0
10.8289	1
13.5318	0
11.8898	0
12.1107	0
11.7175	1
13.0417	0
12.2723	0
12.6726	0
10.9775	0
12.1758	0
11.8934	0
12.4078	0
11.4117	0
13.1235	0
14.0935	0
13.3982	0
11.6153	0
11.8127	0
12.0828	0
11.4173	0
12.0996	0
9.5048	0
12.4782	0
12.0556	0
11.5809	0
12.7366	0
13.3275	0
13.9021	0
12.6742	0
12.2437	0
11.2189	0
10.7312	0
13.1309	0
12.2008	0
11.5077	0
11.0261	0
10.5855	0
11.9026	0
11.3684	0
12.0704	0
12.8069	0
11.4591	0
12.1279	0
12.8004	0
12.3779	0
12.6394	0
11.2629	0
11.9063	0
12.3047	0
11.6988	1
11.4208	0
10.4092	0
12.8757	0
11.2343	0
10.753	0
11.4206	0
12.9121	0
11.834	1
12.8135	0
10.6706	1
10.6056	1
11.2213	1
11.5163	1
10.7999	1
11.1282	1
11.1768	1
12.424	1
11.6714	1
12.9603	1
10.6913	1
11.66	1
11.0141	1
12.38	1
10.7935	1
12.1925	0
11.2566	1
11.9376	1
12.2636	1
11.8943	1
11.2381	1
11.7367	1
11.5249	1
13.9981	1
11.5336	1
11.0009	1
11.7204	1
12.472	1
11.4438	1
11.5243	1
11.1271	1
11.3285	1
11.252	1
11.3784	1
10.0795	1
11.6379	1
11.3276	0
11.6814	1
11.0441	1
10.9955	1
11.2106	1
11.7498	1
10.7986	1
11.6328	0
11.6279	1
11.0632	1
10.8899	1
10.2709	1
9.3996	1
11.1492	1
11.7898	1
11.3825	1
10.8727	1
10.9534	1
11.1217	1
11.9155	0
9.8495	1
11.1375	1
11.1569	1
11.7905	1
11.6394	1
10.0165	1
11.767	1
11.3257	1
11.1457	1
12.0016	1
10.4308	1
12.225	1
11.993	1
11.3364	1
10.7698	1
11.4235	1
10.1828	1
10.8391	1
11.1509	1
12.7856	1
11.405	1
11.1345	1
11.8507	1
10.6234	1
10.7308	1
12.3273	1
11.3102	1
12.5716	1
11.5092	1
10.0779	1
11.4275	1
11.7337	1
10.8362	1
12.35	0
11.5627	1
11.4067	1
11.1302	1
11.6381	1
10.3403	0
12.2226	1
11.5782	1
13.609	1
11.7142	0
11.4333	0
11.9291	1
11.298	1
11.4773	1
11.0107	1
10.9405	1
11.2757	0
11.7703	0
11.5712	0
11.411	1
11.3369	0
11.4115	1
11.9104	0
11.9625	0
11.9409	0
12.2987	1
10.3364	0
11.689	0
11.0765	0
11.3532	0
11.0521	1
12.4799	1
11.9296	0
11.0084	1
11.9523	1
11.751	1
13.6617	0
11.6539	0
12.1265	0
11.558	0
10.4448	1
13.0769	1
12.3745	1
11.1941	1
13.6358	1
11.4438	0
10.8576	0
10.8034	1
10.8956	1
11.0691	1
11.0795	1
14.1701	0
12.4581	0
11.4069	1
10.3351	1
12.3538	1
12.0306	1
11.0919	1
11.7619	1
11.6068	1
12.0361	0
10.9973	1
10.9151	0
11.5301	1
11.5467	1
12.4216	0
13.0212	0
11.4145	1
11.0858	1
12.3572	1
10.9739	1
11.6692	1
12.681	1
10.874	1
12.1541	1
11.3449	1
11.1549	1
10.734	1
10.9756	1
12.234	1
11.2912	1
11.3443	1
12.7883	1
11.2398	1
10.9395	1
11.2269	0
10.9692	1
10.6788	1
11.3386	1
12.5575	0
11.0055	1
13.1123	1
13.566	0
10.8086	1
10.6315	1
12.2266	0
12.3948	1
10.7202	1
13.2287	1
11.72	1
10.2366	1
10.5922	1
11.2824	1
10.5122	1
13.1058	1
12.3851	1
10.4218	1
11.1874	1
11.3209	1
11.1392	1
12.2238	0
13.2263	0
11.5429	0
14.0619	1
12.1767	1
11.4222	0
12.4271	1
14.2716	1
12.0017	0
11.9278	1
13.0362	0
12.1134	1
11.2932	1
11.8893	1
11.9175	1
11.5112	1
12.8553	1
10.8902	1
11.4393	1
11.3737	0
12.2293	1
14.0864	1
10.7881	1
11.0908	1
11.5829	1
12.4918	1
11.9438	1
12.7533	1
11.1804	1
12.5427	1
11.2864	1
11.0217	1
11.2524	1
12.5707	1
12.424	0
12.5821	0
10.7255	1
11.95	1
12.0897	0
13.1464	1
11.0061	1
11.5792	0
12.5424	0
13.095	1
11.7645	1
11.6254	1
12.3271	1
13.6989	1
11.5036	1
12.4765	0
11.6537	1
11.287	1
13.1059	1
12.9849	1
12.0379	1
11.1097	1
11.2835	1
12.5571	0
12.5335	0
11.5175	1
12.6102	1
14.2887	0
11.987	1
11.5184	1
11.2623	0
12.2398	0
11.0637	1
10.9032	1
12.7021	0
12.5849	1
11.8616	1
10.9415	1
11.2646	1
11.2672	1
11.0474	1
11.1695	1
12.1721	1
12.3261	1
11.6386	0
12.0299	0
12.8423	0
12.3698	1
12.3242	0
12.4318	1
12.6325	1
12.8034	0
12.6187	0
12.4415	0
11.7874	0
10.6754	0
11.7946	1
12.0731	1
11.6956	1
11.3775	1
12.265	0
12.5265	0
11.4306	0
12.0901	0
12.3748	1
11.0512	1
12.4626	0
11.6627	0
10.8126	1
10.2562	1
11.3767	0
10.8015	1
11.6209	1
11.55	1
11.41	1
11.5532	0
10.9673	1
12.7968	0
10.4542	1
11.6139	1
10.9922	1
11.8073	0
11.3869	1
11.696	0
11.7138	1
11.2612	0
13.8193	0
10.7929	1
11.6998	0
12.0817	0
11.1144	1
11.3382	1
11.0317	0
11.8473	0
11.061	1
11.0467	1
12.6723	1
10.9726	0
12.2755	0
11.1629	0
11.9375	1
10.8716	1
11.3077	1
11.2931	1
11.962	1
10.9547	0
10.8168	0
10.3816	1
12.1931	1
10.8838	0
11.9385	1
10.8704	0
13.0985	0
12.8501	0
12.4413	1
11.0425	1
11.9812	1
11.8185	1
10.2514	1
12.2086	0
11.5014	1
9.2578	1
12.5852	1
11.5071	1
10.5546	1
12.5244	1
11.7102	1
11.89	1
12.1916	1
11.3532	1
10.6875	0
12.2471	0
12.189	1
11.091	1
10.9699	1
11.2882	1
10.8477	1
10.3741	1
13.966	0
12.6517	0
13.6771	1
11.1115	0
10.9307	1
12.5071	1
11.7446	1
12.6027	1
11.3029	1
9.69	1
