# Supplementary material for: TIP-B1 promotes kidney clear cell carcinoma growth and metastasis via EGFR/AKT signaling
Source: Aging (Albany NY). 2019 Sep 27;11(18):7914–37. doi: 10.18632/aging.102298 (PMC6782011; doi:10.18632/aging.102298)
Supplement: Supplementary Table 6 [file aging-11-102298-s004.xlsx]

## Sheet: GSE73121
gene_symbol	logFC	AveExpr	t	P.Value	adj.P.Val	B
HSPA6	10.1586	2.91778	24.7344	1.83724e-43	1.62302e-39	84.7091
KRT81	8.40957	1.62916	24.1166	1.49616e-42	6.60854e-39	82.4235
CSF2	8.5813	1.7441	19.9977	5.04618e-36	1.48593e-32	69.064
MT1L	8.01528	2.54041	19.3135	7.40465e-35	1.63532e-31	66.7864
MT2A	5.63241	7.32271	17.5676	9.11805e-32	1.34248e-28	61.6921
FSTL1	7.48967	2.57954	16.1614	3.71763e-29	4.69164e-26	54.6349
PCSK5	5.57521	9.18626	15.7535	2.22809e-28	2.46037e-25	54.0889
G0S2	6.59585	0.849804	15.1983	2.63556e-27	2.11659e-24	50.4118
HSP90AA1	2.7261	9.7555	13.7519	1.96505e-24	9.64401e-22	44.986
HSPH1	4.43388	7.42068	12.9954	6.87679e-23	2.89284e-20	41.5833
UBB	2.50652	9.66374	12.9008	1.07752e-22	4.32673e-20	41.0018
C5ORF46	6.32928	1.60025	12.6599	3.39381e-22	1.24921e-19	39.4226
ANXA8L1	6.68528	3.17525	12.4422	9.61903e-22	3.39898e-19	38.5528
CACYBP	4.28785	7.45011	12.4181	1.07992e-21	3.66922e-19	38.8636
CCL20	7.59652	2.57908	12.0846	5.37805e-21	1.63827e-18	36.8623
MTRNR2L12	3.18781	12.7569	12.0648	5.91588e-21	1.74203e-18	36.3558
CXCL1	4.56532	9.04573	11.8575	1.61319e-20	3.65408e-18	36.0835
MTRNR2L11	3.11977	7.85515	11.5898	5.92243e-20	1.27607e-17	34.8897
SAT1	2.95639	10.5109	11.5212	8.27306e-20	1.661e-17	34.2365
SERPINE1	4.32142	7.40541	11.2686	2.84117e-19	4.92135e-17	33.3586
CXCL3	5.61258	1.23907	10.983	1.15147e-18	1.84946e-16	31.6598
HSPA1B	3.895	4.59039	10.7408	3.78769e-18	5.57674e-16	30.7215
ZFAND2A	5.31532	5.76424	10.5558	9.42649e-18	1.32313e-15	29.91
MTRNR2L1	2.81177	10.063	10.5556	9.43592e-18	1.32313e-15	29.5891
FLNC	4.63911	2.91757	10.0728	1.02434e-16	1.19066e-14	27.4363
SF3B6	2.10096	7.50938	9.93045	2.07182e-16	2.31677e-14	26.8378
HSP90AB1	1.70052	10.3443	9.92276	2.15221e-16	2.34724e-14	26.4198
RPS7	1.63123	8.5866	9.82161	3.55106e-16	3.6906e-14	26.1975
PSMC4	2.90338	6.51171	9.81016	3.75806e-16	3.86031e-14	26.3021
MTRNR2L10	2.70107	7.41089	9.79268	4.09791e-16	4.06752e-14	26.1712
MTRNR2L6	2.76281	7.80967	9.72449	5.74372e-16	5.51522e-14	25.8043
MTRNR2L8	2.6518	10.9127	9.68358	7.03358e-16	6.54049e-14	25.1228
HSPA8	2.35385	10.1064	9.67474	7.34807e-16	6.76176e-14	25.241
LOX	4.92886	0.926187	9.64588	8.47705e-16	7.72023e-14	25.3372
CCL2	5.71093	3.21869	9.50723	1.68437e-15	1.43075e-13	24.7527
HSPA1A	4.80377	4.68714	9.31466	4.37017e-15	3.5632e-13	23.8874
RPS19	1.36164	10.3875	9.30254	4.64035e-15	3.66008e-13	23.3516
IFITM2	4.87023	3.92022	9.23252	6.56189e-15	4.95451e-13	23.4658
TCP1	3.05015	7.04692	9.22959	6.65782e-15	4.98434e-13	23.4465
ZNF460	4.91756	2.23171	9.20711	7.44117e-15	5.52397e-13	23.2954
SNRPB2	2.49571	6.7924	9.11922	1.14934e-14	8.25472e-13	22.9255
CSNK2A2	3.16426	6.13734	9.05589	1.57202e-14	1.08494e-12	22.6475
HSPB1	2.29123	5.97372	8.96457	2.46867e-14	1.6438e-12	22.2097
GSTO1	2.1967	7.24629	8.96407	2.47482e-14	1.6438e-12	22.1366
ZC3HAV1	2.93703	7.50735	8.89224	3.52875e-14	2.25891e-12	21.7627
ZNF473	5.16157	2.69125	8.8776	3.79324e-14	2.41075e-12	21.7384
BAG3	3.87986	6.52255	8.86764	3.98438e-14	2.47873e-12	21.7186
CCT4	3.29792	6.50864	8.79268	5.76823e-14	3.51425e-12	21.356
HMGA1	4.18864	1.52983	8.74268	7.38143e-14	4.40591e-12	21.0748
TAF7	2.3686	7.14065	8.63603	1.24853e-13	7.1158e-12	20.5504
ZPLD1	5.01698	1.13968	8.59692	1.5137e-13	8.57178e-12	20.3764
SPOCD1	3.71652	1.32236	8.57562	1.68102e-13	9.39884e-12	20.28
HSPD1	2.15927	8.33892	8.45998	2.9686e-13	1.5336e-11	19.561
ANXA8	4.80306	4.82704	8.42625	3.50366e-13	1.77881e-11	19.6304
TSPYL2	5.14402	2.65313	8.39399	4.10511e-13	2.06049e-11	19.4446
TXNIP	4.49598	6.36597	8.38675	4.25354e-13	2.111e-11	19.403
RPS5	1.75884	8.43288	8.37339	4.54178e-13	2.24146e-11	19.1275
GADD45B	4.396	1.58028	8.3582	4.89327e-13	2.40151e-11	19.2595
IL1A	5.30938	1.05265	8.258	7.99699e-13	3.66038e-11	18.7782
LAPTM4A	1.73087	8.10257	8.23791	8.82397e-13	3.99748e-11	18.515
PLAUR	2.61305	7.2819	8.22949	9.19558e-13	4.14458e-11	18.5697
PHLPP1	3.85533	2.86034	8.1668	1.24964e-12	5.51966e-11	18.3751
CXCL8	2.706	11.2365	8.1627	1.27498e-12	5.57893e-11	17.5771
MOK	3.26383	4.19734	8.16258	1.27569e-12	5.57893e-11	18.3721
NBPF25P	4.01976	1.50399	8.07788	1.92964e-12	8.07887e-11	17.9406
DNAJA1	2.39802	8.19567	8.0377	2.34761e-12	9.55703e-11	17.5358
PPP1R18	4.9229	1.95722	8.02609	2.48445e-12	1.00217e-10	17.7037
FGF2	4.43876	4.14283	7.97041	3.25892e-12	1.29682e-10	17.4635
RSL1D1	1.90519	7.83444	7.96384	3.36489e-12	1.33298e-10	17.2276
MT-ND4	3.47398	11.4328	7.95131	3.57658e-12	1.38449e-10	16.5044
NKX3-1	4.68611	2.63192	7.89581	4.68541e-12	1.77643e-10	17.0998
NBPF14	1.83925	8.02436	7.85456	5.72546e-12	2.12516e-10	16.6786
CAPG	4.63835	3.50392	7.85011	5.85069e-12	2.15354e-10	16.8933
TMA7	1.56926	7.72912	7.84318	6.05098e-12	2.21802e-10	16.662
AXL	3.6083	7.22827	7.84067	6.12512e-12	2.23592e-10	16.7084
MTRNR2L4	2.40853	4.11974	7.72486	1.07401e-11	3.73536e-10	16.3092
NRBF2	2.84169	6.09832	7.61601	1.81789e-11	6.03731e-10	15.7419
ETV3	3.94141	3.53248	7.59907	1.97276e-11	6.47858e-10	15.7202
PEX12	4.3105	0.71676	7.56268	2.35122e-11	7.55297e-10	15.5323
RHBDD2	3.14442	5.39773	7.54799	2.52371e-11	8.0777e-10	15.4589
COL11A1	4.60348	1.60619	7.54411	2.57127e-11	8.18746e-10	15.4546
GRPEL1	2.56665	6.91972	7.53437	2.69477e-11	8.47582e-10	15.285
LAMC2	2.21237	7.89872	7.49062	3.32642e-11	1.03107e-09	14.9602
SELK	1.99844	7.31475	7.39377	5.29618e-11	1.58598e-09	14.577
FAU	1.32209	7.61921	7.39198	5.34195e-11	1.59428e-09	14.5306
ICAM1	2.07887	7.94417	7.36771	6.001e-11	1.7671e-09	14.3727
MT1E	3.53335	4.86575	7.34159	6.80044e-11	1.96967e-09	14.5119
PMAIP1	3.21568	6.46427	7.31114	7.86678e-11	2.25634e-09	14.2791
RPL32	1.453	8.33456	7.30682	8.03098e-11	2.29598e-09	14.0294
DNTTIP2	2.12322	7.34011	7.2677	9.68153e-11	2.70654e-09	13.981
SLBP	3.0729	5.82933	7.25284	1.0393e-10	2.87812e-09	14.0568
RPS27A	1.20158	9.45519	7.24964	1.05533e-10	2.91337e-09	13.5731
SOD2	1.3319	9.94267	7.20305	1.31779e-10	3.59301e-09	13.2601
USPL1	4.55346	2.71475	7.19253	1.38551e-10	3.76604e-09	13.8399
SNRPD2	1.35407	7.95761	7.18703	1.42222e-10	3.85396e-09	13.5212
RANBP2	1.95909	7.62451	7.15317	1.67082e-10	4.47273e-09	13.4083
S100A16	2.62353	7.14972	7.14271	1.75601e-10	4.68659e-09	13.4194
MTND1P23	3.15381	3.28497	7.09678	2.18395e-10	5.67441e-09	13.4014
LAMB3	2.78798	5.85579	7.06685	2.51698e-10	6.48252e-09	13.1923
ABL2	2.30382	7.35715	7.03495	2.92746e-10	7.41008e-09	12.8921
IL6	4.69933	6.36945	6.99725	3.49871e-10	8.70636e-09	12.8281
GNL3	1.78873	6.96567	6.99022	3.61699e-10	8.95027e-09	12.7324
MSX1	3.37253	1.6238	6.9852	3.70366e-10	9.12144e-09	12.8937
PROCR	2.90216	4.78516	6.97479	3.89026e-10	9.44737e-09	12.8225
RPL39	1.30808	8.57045	6.96467	4.08073e-10	9.87648e-09	12.3907
EAF1	2.69609	6.66671	6.951	4.35254e-10	1.03361e-08	12.5845
TNFAIP3	4.02347	4.23514	6.94882	4.39736e-10	1.04146e-08	12.7174
NBPF10	2.33983	6.34148	6.94565	4.4636e-10	1.05432e-08	12.5927
TIMM17A	2.04909	7.7886	6.93857	4.61528e-10	1.08435e-08	12.3871
ODC1	2.86953	6.83027	6.92979	4.81014e-10	1.12118e-08	12.4686
ID2	3.48005	5.80542	6.90153	5.49486e-10	1.25107e-08	12.4349
RPL13A	1.21411	9.47454	6.88973	5.8086e-10	1.31236e-08	11.8855
ANTXR2	3.62462	2.96357	6.86831	6.42406e-10	1.43671e-08	12.3636
DNAJB4	3.03778	6.88209	6.86826	6.42549e-10	1.43671e-08	12.1792
RPL29	1.66746	8.15956	6.8438	7.20776e-10	1.58349e-08	11.8948
ZNF23	4.32994	2.43253	6.83551	7.49362e-10	1.63858e-08	12.2168
HSPA4L	2.78947	5.77411	6.83496	7.51317e-10	1.6388e-08	12.1324
PHF5A	3.64569	2.68845	6.8304	7.67571e-10	1.67013e-08	12.1932
SDE2	3.45186	4.73317	6.81635	8.19829e-10	1.77075e-08	12.1019
TRA2B	1.77074	7.27769	6.808	8.52555e-10	1.82803e-08	11.8535
RNPS1	1.77727	5.85521	6.75005	1.11817e-09	2.35189e-08	11.7391
PNO1	2.93988	4.73106	6.72534	1.25504e-09	2.60871e-08	11.6896
CHORDC1	2.82815	5.91117	6.65234	1.76361e-09	3.55701e-08	11.2908
DPH3	3.55609	4.90302	6.64498	1.82498e-09	3.66406e-08	11.3203
ATP5E	1.12267	8.85044	6.61558	2.0922e-09	4.10723e-08	10.7349
ADAMTS1	3.79721	5.53268	6.60392	2.20856e-09	4.31647e-08	11.1005
PPP1R15A	2.73667	4.9238	6.59684	2.28236e-09	4.43801e-08	11.1027
MYL12A	1.03002	9.75166	6.59651	2.28582e-09	4.43801e-08	10.4811
RAC2	2.69128	6.06447	6.54	2.96979e-09	5.6178e-08	10.7698
RPS2	1.42716	8.22941	6.52883	3.12718e-09	5.86529e-08	10.4418
ARF4	1.48463	8.77915	6.52228	3.2233e-09	6.02e-08	10.322
MBOAT7	3.10548	2.48184	6.52113	3.24056e-09	6.03947e-08	10.8102
FTL	1.16873	13.3045	6.50616	3.47253e-09	6.44068e-08	9.20661
ISY1	3.51382	3.01081	6.50584	3.4777e-09	6.44068e-08	10.7392
MPHOSPH10	2.74901	5.90338	6.49638	3.6328e-09	6.68587e-08	10.588
GTPBP4	2.36218	6.81383	6.49387	3.67525e-09	6.72198e-08	10.4813
DDR2	4.18845	1.25108	6.42439	5.06124e-09	8.99618e-08	10.3878
RPL15	1.17887	9.70917	6.4073	5.47458e-09	9.67249e-08	9.62936
RHOC	1.44366	8.02856	6.39896	5.68829e-09	1.001e-07	9.88578
MT-ND3	2.88403	6.37649	6.37479	6.35533e-09	1.10736e-07	9.99709
FRMD6	4.12454	3.13567	6.37367	6.388e-09	1.11086e-07	10.1537
RHOA	1.43717	8.69394	6.35645	6.91248e-09	1.19735e-07	9.58681
ZNF561	2.87821	4.33599	6.31664	8.29279e-09	1.41699e-07	9.87831
AC027612.6	2.02868	5.80867	6.31573	8.32756e-09	1.41893e-07	9.78956
C1ORF52	3.10114	4.64034	6.30778	8.63543e-09	1.45583e-07	9.82781
ZNF468	3.55367	3.34515	6.28935	9.39324e-09	1.57756e-07	9.78056
COMMD1	3.12874	4.02624	6.28121	9.74808e-09	1.62787e-07	9.73162
RPS21	1.08181	8.03048	6.27262	1.01377e-08	1.68974e-07	9.319
RND3	1.81055	9.41373	6.27119	1.02039e-08	1.69758e-07	9.07436
PNP	4.004	3.13308	6.2414	1.1686e-08	1.91885e-07	9.5735
S100A6	0.970951	10.7981	6.23135	1.2232e-08	1.99277e-07	8.6034
DDX21	1.29994	8.20907	6.23105	1.2249e-08	1.99277e-07	9.10547
CYR61	3.62701	4.96234	6.19984	1.41141e-08	2.27112e-07	9.33743
ALAS1	3.6772	3.91398	6.1846	1.51234e-08	2.4291e-07	9.31164
MT-ND1	1.81622	11.3832	6.17416	1.58562e-08	2.5284e-07	8.20606
IER5	3.17246	5.4458	6.16758	1.63357e-08	2.60017e-07	9.16486
RBBP5	2.68552	5.31768	6.16368	1.6627e-08	2.63231e-07	9.15691
CD274	3.80235	1.58629	6.15754	1.70955e-08	2.7015e-07	9.22116
ZNF701	3.46425	3.80226	6.15716	1.71252e-08	2.7015e-07	9.19476
SEPW1	1.63627	7.28334	6.1467	1.79547e-08	2.82227e-07	8.86995
EIF6	1.95418	7.30784	6.13966	1.85352e-08	2.88783e-07	8.83543
KLF10	2.51299	7.30955	6.13485	1.89427e-08	2.93578e-07	8.81394
TAF2	3.30484	4.36788	6.12999	1.93632e-08	2.9957e-07	9.05943
HDX	3.98897	0.818653	6.1263	1.96881e-08	3.03983e-07	9.09083
CCT3	1.78992	7.11521	6.12373	1.99181e-08	3.06544e-07	8.79183
ISG15	3.38501	3.69991	6.12182	2.00908e-08	3.08129e-07	9.04348
KDM2A	1.98967	5.37307	6.08734	2.34706e-08	3.52617e-07	8.81917
FAM83A	3.02042	3.12735	6.0857	2.36439e-08	3.54618e-07	8.89708
RPL13	1.15635	8.32996	6.08511	2.37073e-08	3.54967e-07	8.43888
RPS13	0.940503	8.79135	6.07951	2.43131e-08	3.63421e-07	8.33582
IFI6	1.892	4.13671	6.07158	2.5196e-08	3.75348e-07	8.81389
RPSA	1.5592	8.03424	6.0712	2.52391e-08	3.75358e-07	8.42516
NUDCD1	3.79456	4.01871	6.05682	2.69257e-08	3.98056e-07	8.75367
HSPA4	2.08673	6.77873	6.05128	2.7604e-08	4.04401e-07	8.51806
FICD	3.76424	4.47502	6.04462	2.84426e-08	4.14623e-07	8.68451
SDCBP	1.48059	9.65623	6.0429	2.86637e-08	4.17158e-07	8.01245
BASP1	3.22873	2.46117	6.02192	3.14933e-08	4.55339e-07	8.62957
MT-ND4L	2.67988	7.73025	5.99738	3.5155e-08	5.04975e-07	8.14814
AHSA1	2.88429	5.03425	5.97379	3.90679e-08	5.5044e-07	8.34924
RBM5	2.59055	4.21397	5.97267	3.92629e-08	5.52307e-07	8.38425
CCT6A	1.35164	8.72381	5.97212	3.93607e-08	5.52802e-07	7.87554
STOML2	3.50869	2.67377	5.9676	4.01626e-08	5.62277e-07	8.3946
CD63	1.10498	9.23699	5.96346	4.09134e-08	5.70978e-07	7.74455
VEPH1	4.1304	2.14564	5.93071	4.735e-08	6.52558e-07	8.24193
RAE1	3.43485	4.88967	5.91447	5.09029e-08	6.98255e-07	8.10245
PDRG1	2.77416	5.63248	5.89631	5.51857e-08	7.52331e-07	7.97049
ANXA1	1.63212	8.82182	5.89014	5.67218e-08	7.7208e-07	7.50043
DRAP1	2.53934	2.30904	5.88645	5.76579e-08	7.83616e-07	8.05199
LSG1	2.93512	4.59684	5.88396	5.82996e-08	7.9112e-07	7.9873
RPL18	1.05285	7.65147	5.87803	5.98571e-08	8.07295e-07	7.64031
MT-ND6	2.65844	7.34273	5.86453	6.35521e-08	8.50635e-07	7.62779
ZNF331	2.71589	2.11306	5.85114	6.7439e-08	8.95874e-07	7.90394
SELT	1.67056	7.64969	5.82813	7.46744e-08	9.84588e-07	7.42472
TYW3	2.68296	5.50749	5.82302	7.63795e-08	1.00258e-06	7.66671
CD44	1.27562	9.80326	5.8216	7.68633e-08	1.00743e-06	7.0151
ILF2	2.1811	7.26157	5.81971	7.75067e-08	1.01286e-06	7.44606
DUSP7	3.16371	1.84152	5.81427	7.93952e-08	1.03601e-06	7.75056
SERPINH1	2.0247	4.79019	5.8115	8.03706e-08	1.04719e-06	7.6677
RPL7	1.02802	10.9402	5.80402	8.30732e-08	1.07605e-06	6.68674
OST4	1.13597	8.60462	5.79984	8.46196e-08	1.09267e-06	7.14718
CHMP2A	2.19122	5.95441	5.79922	8.48508e-08	1.09267e-06	7.52296
SSSCA1	3.27553	2.0733	5.79147	8.78029e-08	1.1225e-06	7.65205
TAGLN2	1.70092	8.16325	5.76189	1.00029e-07	1.26599e-06	7.05813
EIF4G2	1.02015	9.19943	5.7573	1.02072e-07	1.28815e-06	6.85608
TRMT112	1.13109	7.30696	5.7536	1.03748e-07	1.30557e-06	7.15535
RIOK2	3.7989	3.2318	5.74864	1.06037e-07	1.33048e-06	7.45659
C20ORF24	2.6111	4.64755	5.73691	1.11648e-07	1.38525e-06	7.35894
CPSF3	3.62328	2.46265	5.73223	1.13967e-07	1.40809e-06	7.39869
CCDC59	2.18077	5.51621	5.73041	1.14881e-07	1.41543e-06	7.27131
MRPL33	1.29593	6.78544	5.72909	1.15552e-07	1.42171e-06	7.1237
NIFK	1.76184	6.74991	5.7251	1.17591e-07	1.44381e-06	7.11144
RPS18	1.02275	9.72844	5.72494	1.17675e-07	1.44381e-06	6.61311
PSME2	2.00384	6.17169	5.71121	1.24981e-07	1.52709e-06	7.12396
CHCHD2	1.18051	7.53689	5.70588	1.27941e-07	1.55894e-06	6.91686
EIF1AD	2.06986	5.95416	5.7016	1.30362e-07	1.58189e-06	7.107
TUBA1C	1.18126	8.53478	5.69806	1.32402e-07	1.60224e-06	6.72172
RPS2P5	2.35073	2.54517	5.68727	1.38807e-07	1.67288e-06	7.20923
RPL14	1.06882	8.45906	5.68512	1.40121e-07	1.68641e-06	6.6794
DEDD2	3.10158	3.87796	5.68116	1.42569e-07	1.71121e-06	7.15669
TPM3P9	2.9683	2.12374	5.677	1.45187e-07	1.74027e-06	7.17096
CCT7	1.81641	6.16703	5.66405	1.53646e-07	1.8342e-06	6.92436
ZNF350	3.17037	2.29241	5.65756	1.58064e-07	1.88186e-06	7.08794
NBPF19	1.37073	8.63164	5.64669	1.65742e-07	1.96037e-06	6.48547
EEF1G	1.19873	9.02681	5.64192	1.69225e-07	1.99324e-06	6.3939
ANXA5	1.43763	9.83737	5.62307	1.83716e-07	2.14109e-06	6.15469
RBM8A	1.61625	7.28654	5.61962	1.86497e-07	2.17064e-06	6.58744
MSANTD4	3.14799	2.95961	5.61157	1.93154e-07	2.24221e-06	6.88747
RPLP2	0.963803	8.15067	5.60722	1.96841e-07	2.27604e-06	6.39957
SPTY2D1	2.28789	5.72944	5.60495	1.98792e-07	2.2956e-06	6.72164
ALKBH5	2.16962	6.28698	5.60155	2.01752e-07	2.3237e-06	6.64631
PHLDA2	2.75753	1.5549	5.5943	2.08214e-07	2.39189e-06	6.83337
ZNRD1	3.73432	1.42728	5.59282	2.09557e-07	2.39841e-06	6.82879
NOP10	1.15533	7.83822	5.59003	2.12108e-07	2.42402e-06	6.37743
KIN	2.01098	5.25227	5.56768	2.33719e-07	2.63351e-06	6.6075
ERVK3-1	2.81932	4.41372	5.55062	2.51644e-07	2.82828e-06	6.58958
TRIM35	3.22905	1.15915	5.54367	2.59339e-07	2.89633e-06	6.62892
PEA15	1.73674	6.46187	5.54336	2.59682e-07	2.89651e-06	6.38001
GBP3	2.88424	4.7548	5.54181	2.61427e-07	2.90496e-06	6.53417
MTDH	1.49597	7.04442	5.53725	2.66634e-07	2.9591e-06	6.27522
PSMD6	2.64222	5.19832	5.52658	2.79224e-07	3.08719e-06	6.44026
C18ORF21	3.5437	2.0137	5.52342	2.8306e-07	3.12438e-06	6.53491
ZNF622	3.2435	4.2079	5.52294	2.8365e-07	3.1244e-06	6.48426
PAK1IP1	3.11078	4.3467	5.51805	2.89704e-07	3.18711e-06	6.45762
THUMPD2	2.9634	2.82113	5.5112	2.984e-07	3.27055e-06	6.47402
NDUFC2	1.72352	6.24551	5.50559	3.05709e-07	3.34237e-06	6.24881
DLC1	3.13603	1.42649	5.50022	3.12876e-07	3.40388e-06	6.44684
FERMT2	2.9015	4.30519	5.49448	3.20713e-07	3.48056e-06	6.36202
CDC42EP3	1.80222	7.41637	5.49391	3.21501e-07	3.48483e-06	6.03832
MAP2K3	2.13886	4.77201	5.49302	3.22731e-07	3.49388e-06	6.33056
ZNF841	3.43419	2.0064	5.49167	3.24613e-07	3.50995e-06	6.40435
PSMD8	1.87381	6.86741	5.48784	3.3001e-07	3.55959e-06	6.0933
YTHDC1	1.72924	6.12569	5.4856	3.33219e-07	3.58717e-06	6.17965
RPL36A	1.08184	8.35075	5.48549	3.33379e-07	3.58717e-06	5.85228
ARHGEF26	2.89421	2.4443	5.47929	3.42394e-07	3.67522e-06	6.34806
NUDC	1.88155	5.72766	5.46532	3.63595e-07	3.87455e-06	6.13859
BRD2	1.90693	6.07779	5.46392	3.65798e-07	3.89333e-06	6.09498
RPL35A	0.854322	8.86432	5.45901	3.73595e-07	3.95555e-06	5.65053
RRP8	2.93516	3.29754	5.45883	3.73883e-07	3.95555e-06	6.24932
MPHOSPH6	3.36305	2.65379	5.45501	3.80066e-07	4.01615e-06	6.24558
SDC4	1.06879	8.45921	5.44793	3.91798e-07	4.12532e-06	5.67626
YRDC	2.35354	4.53168	5.44646	3.94279e-07	4.1465e-06	6.15227
PDE12	1.96659	4.16935	5.44581	3.95385e-07	4.15319e-06	6.16747
PFDN2	1.2022	6.61655	5.43949	4.06248e-07	4.25035e-06	5.92613
FGF23	1.24596	5.63192	5.42193	4.38005e-07	4.56289e-06	5.96839
DGUOK	2.03764	6.57947	5.41167	4.57675e-07	4.76219e-06	5.81562
EIF3E	1.43889	8.31109	5.40602	4.68853e-07	4.86704e-06	5.52686
ZNF550	3.34753	1.0275	5.40328	4.74387e-07	4.91871e-06	6.05574
SNX16	3.50244	2.07438	5.39878	4.83606e-07	5.00255e-06	6.02343
KIAA1429	2.06907	5.35342	5.39782	4.85595e-07	5.01724e-06	5.89453
SDAD1	2.93479	5.06715	5.39026	5.01534e-07	5.16544e-06	5.88648
TOMM34	2.97699	4.26895	5.38563	5.11534e-07	5.2489e-06	5.91604
RPS16	1.01943	8.43477	5.38561	5.1158e-07	5.2489e-06	5.42065
LYAR	3.64124	2.63042	5.38522	5.12433e-07	5.25155e-06	5.96078
RNF114	2.27273	5.44669	5.36831	5.50759e-07	5.60531e-06	5.765
CALM2	0.805601	10.7259	5.36254	5.64469e-07	5.7154e-06	4.86104
SERP1	1.35449	7.81527	5.35965	5.71481e-07	5.77562e-06	5.41656
ARPC2	1.1565	7.55801	5.35619	5.79949e-07	5.84849e-06	5.44317
MFAP1	2.79985	4.41935	5.35106	5.92762e-07	5.95729e-06	5.76719
LPXN	3.3917	1.54486	5.34076	6.19311e-07	6.20998e-06	5.7951
PIM2	2.70681	2.6007	5.33935	6.23042e-07	6.24031e-06	5.77484
TAF1A	3.4631	1.51578	5.33099	6.45555e-07	6.44388e-06	5.75603
C18ORF25	2.86322	4.2473	5.31741	6.83889e-07	6.81113e-06	5.63888
CXCL6	2.81308	7.03492	5.30798	7.11787e-07	7.05716e-06	5.32387
CD40	3.03575	2.73711	5.28888	7.7174e-07	7.58186e-06	5.56861
GMPPB	2.67096	2.2195	5.28867	7.72433e-07	7.58186e-06	5.57536
GPX8	3.27665	1.78222	5.28747	7.76358e-07	7.59507e-06	5.57662
ZNF761	2.54776	3.9487	5.28413	7.87428e-07	7.68634e-06	5.51711
NBPF20	1.87239	6.50233	5.24338	9.35252e-07	8.93191e-06	5.13446
MT1X	3.00936	3.00775	5.23002	9.89376e-07	9.4256e-06	5.3267
SGK1	3.16554	4.18538	5.22808	9.97496e-07	9.48533e-06	5.28055
EIF5	1.60471	7.52522	5.22391	1.01513e-06	9.63591e-06	4.90497
TNFRSF10D	3.28575	2.37799	5.21042	1.07437e-06	1.01508e-05	5.25898
NIP7	2.83046	4.71702	5.20908	1.08041e-06	1.0197e-05	5.17412
PPP2R1A	1.97191	4.83757	5.20078	1.11871e-06	1.05135e-05	5.13259
RPS9	1.82171	3.94123	5.19	1.17046e-06	1.09649e-05	5.13851
MCAM	2.56893	3.64532	5.18696	1.18547e-06	1.10601e-05	5.13731
PAPD5	1.85718	6.88816	5.17036	1.27084e-06	1.1768e-05	4.78408
SLC22A3	3.17936	0.746103	5.15591	1.35e-06	1.24487e-05	5.06589
VGLL3	2.13121	5.78571	5.15307	1.36609e-06	1.25447e-05	4.85645
EIF4A2	1.15515	9.16735	5.15003	1.38354e-06	1.26786e-05	4.31846
GADD45A	1.53361	6.91507	5.13848	1.45188e-06	1.32362e-05	4.65137
BRIX1	2.4996	4.5692	5.13816	1.45384e-06	1.32405e-05	4.89912
KARS	2.17319	6.29965	5.12182	1.55632e-06	1.41155e-05	4.66945
RPS25	0.866178	9.2771	5.10896	1.64189e-06	1.47854e-05	4.1307
NBPF26	2.01812	5.74574	5.10841	1.64563e-06	1.4804e-05	4.68164
AGTRAP	3.02226	3.79511	5.09047	1.77301e-06	1.5837e-05	4.74784
RPL9P9	1.49014	9.35159	5.08516	1.81249e-06	1.61407e-05	4.01996
ZNF583	2.54699	2.03144	5.08365	1.8239e-06	1.62259e-05	4.76072
MRPS17	1.9422	5.22201	5.08282	1.83021e-06	1.62657e-05	4.63044
AMOTL2	3.25298	4.09125	5.08153	1.84002e-06	1.63364e-05	4.69981
HNRNPU	1.13502	8.58293	5.07776	1.86896e-06	1.65767e-05	4.13477
RBSN	2.6274	2.88212	5.06943	1.93462e-06	1.70734e-05	4.69063
TNIP2	2.78227	0.961188	5.06767	1.94883e-06	1.71645e-05	4.71492
HNRNPC	1.03524	8.28408	5.06398	1.97882e-06	1.7394e-05	4.13205
MME	2.42343	6.40345	5.06357	1.9822e-06	1.74063e-05	4.42255
IL32	1.32944	7.51341	5.06221	1.99334e-06	1.74695e-05	4.25304
RSRC2	1.81585	7.10093	5.0556	2.04865e-06	1.78832e-05	4.29077
SLC3A2	2.12449	5.33207	5.03525	2.22836e-06	1.93183e-05	4.43177
AC141586.5	2.80689	1.55431	5.034	2.23996e-06	1.93998e-05	4.57329
NUAK1	2.6592	4.04508	5.02657	2.30969e-06	1.98674e-05	4.48498
MBD1	2.46132	4.66229	5.01966	2.37637e-06	2.03814e-05	4.42302
CKS2	2.11489	6.193	5.01056	2.46716e-06	2.11396e-05	4.23918
TSN	2.20649	6.41436	5.00939	2.47905e-06	2.12209e-05	4.20548
MRPL44	2.77335	2.03612	5.00869	2.4863e-06	2.12418e-05	4.46639
UTP3	2.92895	3.54343	5.00569	2.51712e-06	2.14636e-05	4.42276
POP4	2.60725	4.02386	5.00275	2.54775e-06	2.16829e-05	4.39238
ZNF410	3.57992	2.62454	4.99817	2.59623e-06	2.2053e-05	4.41585
API5	2.53217	5.47524	4.98805	2.70651e-06	2.29236e-05	4.23162
CLK1	2.38266	5.88656	4.98567	2.73315e-06	2.31049e-05	4.17804
S100A13	1.27698	7.68215	4.98222	2.77211e-06	2.34119e-05	3.90667
RNF181	1.72053	6.00022	4.97593	2.84463e-06	2.39785e-05	4.12615
USP39	2.72812	3.10217	4.97256	2.88422e-06	2.42659e-05	4.30582
EIF3I	1.5044	8.3404	4.96845	2.93327e-06	2.46317e-05	3.74066
RPL30	0.888674	9.1975	4.96205	3.01117e-06	2.52139e-05	3.55711
SF3B1	1.80428	6.60983	4.94624	3.21258e-06	2.67735e-05	3.92869
NOB1	2.82588	2.35325	4.94427	3.23846e-06	2.69638e-05	4.21046
YTHDF2	1.40606	6.86576	4.94091	3.28326e-06	2.73111e-05	3.87063
E2F4	2.74791	1.65072	4.92605	3.48875e-06	2.89658e-05	4.15145
RPS11	0.830766	9.45479	4.90427	3.81265e-06	3.13895e-05	3.27727
RBM39	1.00604	8.34322	4.90289	3.83418e-06	3.15374e-05	3.48079
PRKD2	2.39602	2.43381	4.8992	3.89212e-06	3.19248e-05	4.03465
SBDSP1	3.18562	3.10033	4.89799	3.91135e-06	3.20528e-05	4.01632
CCT8	2.11775	7.51662	4.8938	3.97864e-06	3.25137e-05	3.58425
RGS2	2.89748	6.54123	4.88215	4.17162e-06	3.38403e-05	3.68679
IGFBP6	2.75548	1.89156	4.88005	4.20738e-06	3.40366e-05	3.96977
USB1	2.92265	2.22773	4.87593	4.27823e-06	3.45465e-05	3.94833
SLPI	1.39209	10.9472	4.87348	4.32107e-06	3.47668e-05	2.8252
SRP14	0.781664	9.31232	4.8467	4.81631e-06	3.84348e-05	3.07914
ZPR1	1.91219	4.91099	4.84534	4.84289e-06	3.85772e-05	3.72449
SLC43A3	2.77024	3.0455	4.83941	4.96042e-06	3.93007e-05	3.79204
ZP3	2.47257	1.37042	4.83774	4.99403e-06	3.95316e-05	3.81681
GORAB	3.22869	3.39367	4.83254	5.10021e-06	4.02998e-05	3.7559
SCNM1	2.21338	4.94225	4.83051	5.14215e-06	4.05949e-05	3.66473
SPHK1	2.71593	2.08717	4.82447	5.26905e-06	4.13749e-05	3.75322
TNFAIP6	2.64986	5.1846	4.81778	5.41326e-06	4.23192e-05	3.59509
RPL28	1.38366	6.53166	4.80161	5.77757e-06	4.49288e-05	3.37484
PRRG3	1.34927	4.62436	4.79806	5.86091e-06	4.54967e-05	3.56348
NOP58	2.02152	6.16406	4.79752	5.87348e-06	4.55543e-05	3.40904
PUF60	2.58058	4.07384	4.79675	5.89168e-06	4.56153e-05	3.59129
NOCT	2.18231	3.19593	4.79087	6.0328e-06	4.66262e-05	3.60231
RPL9	1.36245	7.23301	4.78521	6.17172e-06	4.76059e-05	3.20595
ARL8B	1.7401	6.77865	4.78501	6.17664e-06	4.76059e-05	3.2748
UBE2D3	1.13898	8.7445	4.78297	6.22736e-06	4.78369e-05	2.93906
RPS3A	1.04822	9.88565	4.78091	6.27928e-06	4.8152e-05	2.70432
EIF1B	2.09393	5.87538	4.7787	6.33522e-06	4.85389e-05	3.37244
MRFAP1	1.78369	6.70273	4.77605	6.40302e-06	4.90158e-05	3.25136
PTRF	1.2603	6.14505	4.77244	6.49622e-06	4.96404e-05	3.31479
AZIN1	1.62725	7.1298	4.77224	6.50147e-06	4.96404e-05	3.172
TAF13	1.58395	5.60467	4.76258	6.75839e-06	5.14523e-05	3.34125
EBNA1BP2	1.5123	6.07659	4.76223	6.76796e-06	5.14523e-05	3.28428
COASY	2.6667	1.94438	4.76201	6.77372e-06	5.14523e-05	3.51783
OGFOD1	2.38523	4.36902	4.76009	6.82623e-06	5.18066e-05	3.43474
DCAF13	2.68863	4.58974	4.75322	7.01658e-06	5.30235e-05	3.39431
RNF4	2.18618	5.26123	4.75	7.10762e-06	5.36656e-05	3.32776
PFN1	1.23258	6.36797	4.74337	7.29865e-06	5.49612e-05	3.17318
GTF2H3	2.4372	3.13521	4.73096	7.66965e-06	5.75159e-05	3.37628
DYRK3	2.93175	1.03326	4.72455	7.86856e-06	5.89075e-05	3.39321
COTL1	1.49439	6.34419	4.72125	7.97274e-06	5.95864e-05	3.09166
CCT6P3	2.54482	2.75261	4.72002	8.01189e-06	5.97973e-05	3.34419
NOP56	1.65079	6.15006	4.71592	8.14413e-06	6.0611e-05	3.0973
RGPD8	3.08629	2.27022	4.71106	8.30323e-06	6.16392e-05	3.31946
IFITM3	0.969526	8.28435	4.70617	8.46674e-06	6.28004e-05	2.72543
EIF3M	1.3519	7.74814	4.70376	8.54843e-06	6.3353e-05	2.80825
NAA50	1.64134	6.86979	4.69308	8.91926e-06	6.58802e-05	2.9078
NAV3	2.41178	5.0111	4.69014	9.02423e-06	6.649e-05	3.12222
SETD7	2.2515	4.50362	4.69013	9.02439e-06	6.649e-05	3.16046
GFPT1	1.35166	7.5448	4.68451	9.22831e-06	6.77663e-05	2.7682
RCAN1	2.90775	3.8168	4.68144	9.3416e-06	6.85206e-05	3.16536
THUMPD3	2.02638	4.59696	4.6813	9.34654e-06	6.85206e-05	3.12073
RSAD2	2.75363	1.3392	4.67374	9.6312e-06	7.04321e-05	3.1966
RBM7	2.32372	4.42285	4.64918	1.06155e-05	7.70561e-05	3.01126
TMEM208	2.2973	5.50554	4.6415	1.09424e-05	7.92598e-05	2.89115
UPP1	1.96147	4.91099	4.64142	1.0946e-05	7.92598e-05	2.94654
TSPYL1	2.23547	7.02952	4.63829	1.10821e-05	8.00483e-05	2.67461
ZNF141	2.35532	1.55715	4.63685	1.11454e-05	8.04401e-05	3.05438
SNRPD1	1.4669	6.11198	4.63308	1.13125e-05	8.13799e-05	2.78744
CTSB	1.33931	7.17853	4.63052	1.14274e-05	8.21396e-05	2.6217
HEATR1	2.37616	4.75375	4.62521	1.16695e-05	8.36755e-05	2.89801
NDUFAF3	2.35387	4.3511	4.61412	1.21909e-05	8.71316e-05	2.88428
WDR3	2.17797	5.16654	4.60296	1.2738e-05	9.03109e-05	2.77982
GPAM	3.00672	2.38701	4.59264	1.32652e-05	9.3673e-05	2.87434
NOLC1	1.45257	7.33757	4.58398	1.37244e-05	9.65295e-05	2.42017
TMSB10	0.669613	11.1162	4.58232	1.38137e-05	9.70804e-05	1.6572
PRPF31	2.67285	1.54523	4.57883	1.40043e-05	9.82634e-05	2.83914
FAM208B	1.76166	6.18671	4.56579	1.47383e-05	0.000102842	2.52433
IFI16	2.22384	5.28117	4.55838	1.51719e-05	0.000105784	2.60226
ZDHHC6	2.92232	3.96152	4.55701	1.52532e-05	0.000106114	2.69346
TSPAN1	2.77038	3.60992	4.54864	1.57608e-05	0.000109458	2.67816
SERPINA1	3.03391	4.03753	4.5446	1.60114e-05	0.000111024	2.64358
GFM1	2.22626	4.9484	4.5337	1.67069e-05	0.000115574	2.54092
TBL1XR1	0.970197	9.81235	4.53335	1.67301e-05	0.000115644	1.77232
STIP1	2.42616	4.43884	4.53285	1.67626e-05	0.000115779	2.57621
ERCC4	2.00607	3.33836	4.52716	1.71386e-05	0.000118099	2.60871
NPRL2	3.11591	1.21519	4.51957	1.76526e-05	0.000121195	2.62775
SMIM4	2.15583	3.22935	4.51951	1.76566e-05	0.000121195	2.58406
CEBPZ	1.91311	5.67792	4.51001	1.83212e-05	0.000125494	2.38014
EIF2AK2	1.4245	6.38499	4.50995	1.83255e-05	0.000125494	2.28854
NRAS	1.78675	6.09461	4.49758	1.92278e-05	0.000131064	2.28241
RP9	2.67135	2.17743	4.49577	1.93633e-05	0.000131886	2.52115
RAB11FIP5	1.88028	4.43039	4.49541	1.93904e-05	0.000131968	2.43859
FOXN2	2.39352	4.63315	4.4945	1.9459e-05	0.000132333	2.421
RPL5	0.72489	10.2051	4.49218	1.96347e-05	0.000133323	1.53234
SNRPE	0.984974	6.96758	4.48591	2.01186e-05	0.000136294	2.11207
POLR2B	2.24985	5.6102	4.48073	2.05261e-05	0.000138736	2.27953
ARRDC3	2.37459	7.80628	4.48046	2.05478e-05	0.000138776	1.95454
LRIF1	1.97017	6.43742	4.47445	2.10309e-05	0.000141931	2.14935
CCT6P1	2.54027	0.697142	4.46915	2.14672e-05	0.000144544	2.45325
EIF3H	1.36722	7.75796	4.46893	2.14856e-05	0.000144557	1.9199
PHF8	2.56831	1.18733	4.46723	2.16269e-05	0.000145287	2.43716
NME6	2.29054	2.82257	4.46679	2.16636e-05	0.000145423	2.40205
SPCS1	0.950149	7.79292	4.46583	2.17445e-05	0.000145659	1.90245
FTH1	0.999381	9.6841	4.46142	2.21185e-05	0.000148027	1.53014
DNAJB1	1.56704	7.7297	4.45137	2.29935e-05	0.00015307	1.85957
GOT2	2.09606	4.43172	4.44928	2.31793e-05	0.000154093	2.26926
BST2	1.75903	5.4448	4.44368	2.36857e-05	0.000156969	2.16133
ORC5	2.62684	4.12008	4.43238	2.47388e-05	0.000163213	2.22693
SNIP1	2.25511	4.11586	4.41636	2.6311e-05	0.000172683	2.16885
DNTTIP1	2.75979	2.71218	4.41617	2.63306e-05	0.000172683	2.22061
PALB2	2.72936	1.41119	4.41406	2.65446e-05	0.000173958	2.23961
DCP1A	2.40453	3.68547	4.39425	2.864e-05	0.000185352	2.11018
AMD1	1.89166	5.62708	4.39015	2.90929e-05	0.000188008	1.94543
EXOSC4	2.46499	1.50855	4.38847	2.92799e-05	0.00018894	2.14524
SRRM1	0.87482	7.99834	4.38456	2.97216e-05	0.00019151	1.56713
PSME1	1.17	7.43917	4.38216	2.99955e-05	0.000192994	1.65334
TSTA3	2.91224	1.31649	4.38139	3.00846e-05	0.000193073	2.12397
NT5DC2	2.05562	4.91179	4.3811	3.01172e-05	0.000193073	1.98429
MAK16	3.02296	1.20618	4.37015	3.14036e-05	0.000200448	2.08605
MAPRE1	1.70331	7.01185	4.36919	3.15195e-05	0.000201042	1.67528
CCDC174	2.08573	3.68084	4.36846	3.16073e-05	0.000201457	2.01728
ZYX	1.79878	5.18558	4.3657	3.19423e-05	0.000203152	1.90344
TBCEL	2.7281	1.66334	4.36155	3.24516e-05	0.000206243	2.04517
GTF2B	2.31426	5.15805	4.3598	3.26684e-05	0.000207322	1.88476
FOSL1	2.09897	4.28975	4.3542	3.33739e-05	0.000211192	1.93342
GTF3C4	2.78345	1.81747	4.34125	3.50598e-05	0.000220754	1.96921
AIMP1	1.46573	6.2676	4.33995	3.52337e-05	0.000221691	1.68082
MT-CO2	2.0051	11.4415	4.33963	3.52758e-05	0.000221798	0.669562
MRPL18	2.0855	5.36505	4.33575	3.58009e-05	0.000224461	1.77703
GPATCH1	2.38565	2.42651	4.33401	3.60386e-05	0.000225471	1.93108
RPL24	0.771224	8.66619	4.33333	3.61316e-05	0.000225893	1.25932
FSD1L	2.46832	2.8677	4.33091	3.64648e-05	0.000227815	1.91002
KLF7	2.6129	2.09916	4.32826	3.68337e-05	0.000229643	1.91704
PHLDA1	1.93255	6.65963	4.32369	3.74779e-05	0.000232991	1.56454
ZNF600	3.09738	2.47085	4.31786	3.83153e-05	0.000237528	1.87253
EIF5B	0.964706	7.79623	4.30843	3.97099e-05	0.000245313	1.32441
LCORL	2.59346	1.50037	4.30793	3.97843e-05	0.000245601	1.85732
FSD2	2.56711	2.34483	4.30594	4.00858e-05	0.000246944	1.8326
VAMP8	1.82625	6.0868	4.30004	4.09895e-05	0.00025216	1.56159
CWF19L1	2.2493	2.64047	4.29816	4.12829e-05	0.000253259	1.7987
RNASEH1	2.6248	3.56175	4.29746	4.13926e-05	0.000253756	1.76785
EIF3F	1.38654	6.50351	4.29652	4.15385e-05	0.000254474	1.48981
SNAPC1	2.03102	3.792	4.29433	4.18843e-05	0.000256414	1.74654
VIMP	0.958642	7.79829	4.29304	4.20886e-05	0.000257486	1.26836
PDE4DIP	0.961103	7.28116	4.29067	4.24669e-05	0.000259262	1.34674
RMND1	2.52154	1.44983	4.28989	4.25921e-05	0.000259847	1.79444
HSPA5	1.07943	8.71628	4.28419	4.35195e-05	0.000265139	1.07145
MROH1	2.22728	2.40904	4.28397	4.35545e-05	0.000265169	1.75327
PRDX1	0.603092	9.75199	4.28201	4.38793e-05	0.000266779	0.856786
MRM2	2.33854	3.72646	4.28143	4.39745e-05	0.000267174	1.70368
PRPF38A	2.23885	4.69479	4.27773	4.45928e-05	0.000270222	1.63039
GPATCH4	1.99635	5.44074	4.27696	4.47219e-05	0.000270598	1.55772
TOMM6	1.70166	5.39364	4.266	4.6607e-05	0.00028097	1.52365
PGM2	3.00552	2.57411	4.26589	4.66269e-05	0.00028097	1.68571
BAZ1A	1.92788	4.74972	4.25907	4.78381e-05	0.000287484	1.55953
PSMC6	1.64249	6.37431	4.25175	4.91729e-05	0.000294904	1.34801
BTF3	0.816214	8.53457	4.25102	4.93064e-05	0.000295303	0.985665
CDC37	1.28035	4.12056	4.24915	4.96553e-05	0.000297192	1.56848
FRG1	1.95231	4.72592	4.2457	5.03017e-05	0.000300653	1.51397
C11ORF58	1.09796	7.67774	4.24021	5.1349e-05	0.000306084	1.09877
NLE1	2.43498	1.50148	4.23898	5.15868e-05	0.000307294	1.61349
CWC25	1.82503	5.23581	4.23455	5.24493e-05	0.000311801	1.42815
RNF113A	2.87183	1.9801	4.22662	5.40307e-05	0.000319911	1.55953
FTSJ1	2.27712	3.77845	4.22561	5.42348e-05	0.000320905	1.50361
DUSP11	2.5925	4.28807	4.22357	5.46505e-05	0.000322932	1.46762
ZNF3	2.16777	4.30497	4.22163	5.50488e-05	0.000325067	1.45966
MDH2	1.43899	7.17702	4.21377	5.66913e-05	0.000333429	1.08793
SBDS	0.974897	7.73761	4.20913	5.76817e-05	0.000338578	0.977384
NXT1	2.3775	1.87117	4.20038	5.95949e-05	0.00034865	1.4699
RPS6	0.863801	9.5829	4.19026	6.18857e-05	0.000359906	0.562427
SMUG1	2.42023	2.47006	4.18815	6.23749e-05	0.000362275	1.41463
INHBB	2.61774	1.24518	4.18564	6.29604e-05	0.000364624	1.43271
ZNF654	2.3627	4.8866	4.17701	6.50125e-05	0.000374678	1.25796
TXNL4B	2.72835	3.32411	4.17698	6.50194e-05	0.000374678	1.3519
TXN	0.760124	8.12638	4.1735	6.58663e-05	0.000378817	0.782615
FLOT1	2.3879	2.53411	4.17146	6.63676e-05	0.000381149	1.35502
GHITM	1.1282	7.99285	4.17132	6.64012e-05	0.000381149	0.798523
SF3B5	2.11167	4.55333	4.16906	6.69618e-05	0.00038337	1.25726
HSPA14	2.79584	2.01348	4.16882	6.70208e-05	0.00038346	1.35674
DR1	1.5242	6.35305	4.16575	6.77885e-05	0.000387601	1.0457
DSE	2.77055	2.9736	4.16307	6.84668e-05	0.000390973	1.3147
PPP2CA	1.16507	7.21955	4.15829	6.96907e-05	0.000397192	0.884095
GCH1	2.60331	1.08179	4.14677	7.27267e-05	0.000412641	1.30142
RABGEF1	1.33562	6.52599	4.14542	7.30915e-05	0.00041417	0.948481
ETS1	1.28999	6.73089	4.13735	7.5306e-05	0.000425626	0.888706
TCEB2	0.859014	6.92955	4.13038	7.72698e-05	0.000436256	0.832866
MTF1	1.62489	5.02656	4.12647	7.83928e-05	0.000442224	1.06844
RPL27	0.690032	8.93487	4.09941	8.66047e-05	0.000484833	0.370954
NDUFA4	0.776952	8.77599	4.09887	8.67751e-05	0.000485479	0.3996
COG3	2.52947	3.04232	4.09641	8.75641e-05	0.000489583	1.0818
MORC3	2.39104	3.83208	4.09428	8.82519e-05	0.000492964	1.0429
TGDS	3.01736	2.83107	4.08843	9.0166e-05	0.000502858	1.06043
HBS1L	1.94252	5.12567	4.08747	9.0486e-05	0.000504324	0.923432
ACVR2A	2.2855	3.66542	4.08698	9.06475e-05	0.000504906	1.02583
TCEAL9	1.01772	7.45762	4.08681	9.07054e-05	0.00050491	0.59329
PLRG1	2.82756	3.84909	4.08602	9.09678e-05	0.000506052	1.01355
PCGF6	2.58716	1.68947	4.07643	9.42219e-05	0.000521134	1.04497
RAF1	1.89569	4.17093	4.07399	9.50659e-05	0.000525211	0.953685
SIRT1	2.2225	3.82436	4.06932	9.67044e-05	0.000532759	0.95738
ZNF398	2.68029	2.06906	4.06874	9.69092e-05	0.000533393	1.01017
NBPF9	1.04827	7.22653	4.06354	9.87695e-05	0.000542618	0.550925
CFAP20	2.55337	3.45187	4.06224	9.92412e-05	0.000544685	0.94999
SHQ1	2.2411	3.24902	4.06216	9.9269e-05	0.000544685	0.957355
MAP3K9	2.16119	2.12103	4.06068	9.98074e-05	0.00054696	0.981487
CDC26	2.32763	3.76892	4.05764	0.000100924	0.000552392	0.920072
CDK11A	2.11918	2.26159	4.05747	0.000100987	0.000552394	0.967507
ASCC3	2.11947	3.93344	4.05658	0.000101312	0.00055383	0.907887
TOP1	1.21674	5.67503	4.05468	0.000102019	0.00055735	0.749447
UBL5	0.817147	7.64528	4.0533	0.000102535	0.000559134	0.444584
PLPP5	2.09703	2.54869	4.05246	0.000102848	0.000560328	0.944164
RPS15	0.77744	7.70618	4.04861	0.000104304	0.000567379	0.417806
CSGALNACT2	1.99759	4.4899	4.04754	0.000104711	0.000569239	0.840817
C3ORF38	2.6931	3.9528	4.04697	0.00010493	0.00057008	0.873865
RAET1K	2.03909	0.630175	4.03959	0.000107789	0.000584177	0.943108
TWISTNB	1.94818	5.63121	4.03679	0.000108892	0.000589429	0.693145
KPNA4	1.37977	7.67448	4.03296	0.000110422	0.000596253	0.369024
TMEM33	1.38314	7.59391	4.03071	0.000111327	0.000600407	0.375106
LCMT2	1.74873	2.07759	4.02593	0.00011328	0.000609447	0.864012
RBBP6	1.7133	6.16528	4.02237	0.000114753	0.000616249	0.573376
GBP1	2.62933	4.71253	4.02089	0.000115374	0.000619096	0.731969
RPL19	0.682012	9.81212	4.0206	0.000115494	0.000619096	-0.0830336
CYCS	0.773001	9.64842	4.00991	0.000120061	0.000641634	-0.0852406
AAR2	2.21371	3.58377	4.00653	0.000121542	0.000647587	0.754382
NKRF	2.76948	1.85568	4.00103	0.000123989	0.000658638	0.784567
ST3GAL1	1.86517	4.78042	3.99486	0.000126784	0.000672273	0.637481
ZSWIM1	1.60566	1.87752	3.99302	0.000127632	0.000676363	0.757024
NUP205	2.49143	2.26176	3.99039	0.000128851	0.000681599	0.73967
ZNF432	2.38004	2.29856	3.98949	0.00012927	0.000682995	0.735842
TGFB2	2.42871	4.1917	3.98847	0.000129749	0.00068512	0.660172
RPS4X	0.816785	8.90609	3.98754	0.000130184	0.000687003	-0.012452
HARS2	2.73539	2.59792	3.98677	0.000130549	0.000688521	0.719924
NRIP1	1.7202	5.93228	3.98579	0.00013101	0.00069054	0.480135
CCDC137	2.2124	1.9795	3.98069	0.000133445	0.000700472	0.713121
DAD1	0.77747	7.42832	3.97971	0.000133919	0.00070197	0.227712
FCF1	1.37208	3.38899	3.97827	0.000134615	0.000704915	0.666816
MT-ND5	2.00363	9.36331	3.97723	0.000135121	0.000707058	-0.138853
TTC14	2.29521	3.85908	3.97483	0.000136295	0.000712444	0.633628
KCTD6	2.17685	2.07945	3.96776	0.000139812	0.000729964	0.667382
CBWD5	1.6436	5.27889	3.96352	0.000141963	0.000739887	0.482986
WDR43	1.03464	7.43719	3.95698	0.000145344	0.000756165	0.148465
HIST1H4I	2.15038	1.05004	3.94947	0.000149316	0.000775462	0.630626
ELK3	2.05094	4.16839	3.94866	0.00014975	0.000777255	0.527199
RPS10	0.807247	8.27991	3.94551	0.000151453	0.000785175	-0.0388799
CFL2	2.38311	3.12612	3.94506	0.000151702	0.00078543	0.564567
FSTL3	2.12626	1.27459	3.94501	0.000151728	0.00078543	0.610328
DCAF7	1.84999	5.1781	3.93362	0.00015805	0.000816022	0.392512
COPZ1	1.70762	5.9325	3.9301	0.000160056	0.000825061	0.290995
SART3	2.19325	3.50284	3.92604	0.000162401	0.000833615	0.486583
POLR2K	1.33244	6.86195	3.92532	0.000162815	0.000835254	0.136163
MEST	2.87855	2.95788	3.9133	0.000169965	0.0008669	0.463733
IRF3	1.82704	1.22224	3.91179	0.000170886	0.000871094	0.500894
CNBP	0.956048	8.48441	3.90932	0.000172397	0.000878291	-0.199702
MRPS12	1.86852	3.90272	3.90701	0.000173823	0.000883516	0.403477
CBWD3	1.39751	4.95164	3.89814	0.000179405	0.000907713	0.295704
TCEB1	0.716275	7.7719	3.89645	0.000180489	0.000912671	-0.114786
CLIC2	2.37507	1.52498	3.8943	0.000181877	0.000918639	0.435226
TRPM4	1.73689	2.08833	3.88865	0.000185566	0.000936735	0.403123
GOLGA4	1.01325	7.81687	3.88412	0.000188579	0.000950318	-0.164269
USP10	2.0098	4.30041	3.88178	0.000190158	0.000957181	0.294475
LAMA1	2.30034	1.49563	3.87944	0.000191745	0.000964075	0.386778
RPL41	0.599072	10.8394	3.86889	0.000199055	0.000997986	-0.837125
ADAR	1.40996	6.20609	3.86759	0.000199976	0.00100204	0.0426406
SH3RF1	1.99817	5.72089	3.86385	0.000202646	0.00101312	0.0962315
SON	0.90364	7.89276	3.86322	0.000203094	0.00101363	-0.247971
ABT1	2.55702	1.60643	3.86183	0.000204095	0.00101806	0.325911
NSA2	1.35529	5.86076	3.8568	0.000207767	0.0010352	0.0546145
KRR1	1.44696	6.49194	3.85198	0.000211338	0.00105121	-0.0522234
NUDT21	2.02062	4.74167	3.84219	0.00021877	0.00108452	0.128592
USP31	1.47278	5.81816	3.84174	0.000219121	0.00108565	0.0101245
NCOA4	1.66583	6.78806	3.83765	0.000222305	0.00109896	-0.146511
PCDH9	1.06411	3.9573	3.83499	0.000224399	0.00110684	0.161561
DHRS1	1.96832	2.73107	3.83137	0.00022728	0.00111979	0.199195
RAB34	2.4967	3.05358	3.82623	0.000231436	0.00113836	0.172725
CASP1	2.85722	1.44854	3.82099	0.000235737	0.0011563	0.1959
SF3A3	1.86069	5.51242	3.81423	0.00024141	0.00118216	-0.0427858
FOXO3	1.77459	5.17607	3.81396	0.000241641	0.0011824	-0.00613331
CLIC1	1.14227	7.25246	3.81385	0.000241728	0.0011824	-0.302191
NCL	0.933559	7.00554	3.8135	0.000242032	0.00118324	-0.262195
SEPHS2	2.1072	3.8658	3.80775	0.000246963	0.00120575	0.0772704
KLK11	2.14623	2.38762	3.80766	0.000247046	0.00120575	0.129961
RBM42	1.98059	1.30695	3.80215	0.000251862	0.00122587	0.13811
CCAR1	1.2986	5.87683	3.80145	0.000252483	0.00122778	-0.130969
ATRAID	1.13173	6.598	3.79649	0.000256909	0.00124699	-0.252898
RPL12	0.838225	8.08673	3.79596	0.000257387	0.00124863	-0.507106
NOL10	2.36927	3.68111	3.78972	0.000263069	0.001272	0.0279635
ZNF808	1.93354	1.47626	3.78771	0.000264931	0.0012786	0.0867361
EIF1AX	0.988924	7.57807	3.78762	0.000265012	0.0012786	-0.444846
ZNF585A	1.80506	4.24852	3.78727	0.00026534	0.00127948	-0.0135193
YKT6	1.74833	3.99704	3.78701	0.00026558	0.00127994	0.00187881
ZNF593	1.66794	3.68758	3.78368	0.000268692	0.00129142	0.0079233
STX18	2.31533	1.26442	3.78021	0.000271961	0.00130429	0.0679455
DNAJC24	1.87056	3.58062	3.77763	0.000274431	0.00131328	-0.00666305
LSM3	1.2731	6.03678	3.77712	0.000274913	0.00131379	-0.23295
DNAJC3	1.27338	7.5632	3.77705	0.000274982	0.00131379	-0.477183
EPM2AIP1	2.45415	4.05236	3.77111	0.000280742	0.00133769	-0.0533111
PKP2	1.57274	1.33376	3.76769	0.000284113	0.00135003	0.0255794
EIF2S2	0.867663	7.2415	3.76253	0.000289266	0.00137018	-0.469948
RPL17	0.645616	8.91275	3.76135	0.00029046	0.00137435	-0.77644
SAP18	0.864815	7.38955	3.75637	0.000295536	0.00139464	-0.515379
SHC1	1.27379	5.19324	3.75497	0.000296975	0.00139919	-0.201217
AKAP2	1.19761	7.3168	3.75425	0.000297724	0.00140197	-0.509928
GNPNAT1	2.17346	4.27704	3.7452	0.000307236	0.00144215	-0.15238
SRSF6	1.46184	8.30398	3.74356	0.000308991	0.00144962	-0.719636
MRTO4	1.75763	3.98412	3.74311	0.000309471	0.0014511	-0.140005
ZNF717	2.40776	1.80287	3.7403	0.000312512	0.00146302	-0.074851
ZNF778	1.78964	1.95169	3.73804	0.000314972	0.00147376	-0.0857455
NAA16	2.37631	1.8172	3.73563	0.000317613	0.00148455	-0.0902288
BZW1P2	2.50473	0.632098	3.73423	0.000319154	0.00149096	-0.0657068
WDR45	1.98026	4.38333	3.73304	0.00032047	0.00149632	-0.199474
TRAPPC2B	2.33438	1.6881	3.73034	0.000323485	0.001508	-0.103995
GFM2	2.15758	2.84654	3.729	0.000324988	0.00151375	-0.13674
STAM	1.93119	5.04849	3.71808	0.000337508	0.00156594	-0.306007
ZNF557	1.25013	4.64916	3.71423	0.000342023	0.00158605	-0.281445
CHST3	1.77962	4.25626	3.71322	0.000343217	0.00158992	-0.254209
PLK2	2.06139	6.11108	3.71248	0.000344095	0.00159217	-0.454438
HELQ	2.50156	1.2814	3.71236	0.000344244	0.00159217	-0.151007
NBPF8	2.14771	3.62358	3.71187	0.000344824	0.00159402	-0.221295
RRN3P1	1.85941	1.64179	3.71078	0.000346125	0.0015992	-0.165534
INHBA	2.34937	4.42572	3.70931	0.000347888	0.00160651	-0.279268
NKIRAS2	1.80309	4.33814	3.7078	0.000349704	0.00161405	-0.277553
POMP	0.711443	7.89351	3.70762	0.000349917	0.00161418	-0.76287
ARL2BP	1.88654	6.25538	3.70741	0.000350176	0.00161454	-0.492004
AC012314.5	1.79518	1.33154	3.70225	0.000356455	0.00163495	-0.184623
AC012314.1	1.79518	1.33154	3.70225	0.000356455	0.00163495	-0.184623
AC012314.2	1.79518	1.33154	3.70225	0.000356455	0.00163495	-0.184623
AC012314.3	1.79518	1.33154	3.70225	0.000356455	0.00163495	-0.184623
AC012314.4	1.79518	1.33154	3.70225	0.000356455	0.00163495	-0.184623
AC012314.6	1.79518	1.33154	3.70225	0.000356455	0.00163495	-0.184623
ID3	2.14806	1.01622	3.70026	0.000358908	0.00164364	-0.182909
TFB2M	2.18762	4.35443	3.69745	0.000362404	0.0016588	-0.31201
RLF	1.76784	5.49389	3.69577	0.000364511	0.00166626	-0.42702
TRIM28	1.8059	1.58517	3.6957	0.000364601	0.00166626	-0.212256
TFIP11	1.81881	4.23045	3.69493	0.000365558	0.00166977	-0.311175
INTS12	2.47645	3.07942	3.69031	0.000371421	0.00169326	-0.268203
SH3BGRL3	0.667883	10.0316	3.68863	0.000373571	0.00170109	-1.2476
CSTF1	2.08499	4.25476	3.68581	0.000377218	0.00171682	-0.342127
CATSPER2P1	1.87554	1.4553	3.68185	0.000382387	0.00173766	-0.252946
MCFD2	0.898922	7.3327	3.67923	0.000385843	0.00175235	-0.757131
MX1	1.81784	2.40417	3.6791	0.000386017	0.00175235	-0.284963
CLTA	1.46388	5.15648	3.67807	0.000387377	0.00175762	-0.445961
NUBP2	1.6685	1.49361	3.6717	0.000395942	0.00179005	-0.286212
PRPF39	1.50795	4.65721	3.66884	0.000399831	0.00180578	-0.427832

## Sheet: GSE781
ID	adj.P.Val	P.Value	t	B	logFC	Gene.symbol	Gene.title	Gene.ID
203438_at	3.98e-08	8.54e-12	15.3676	16.8906	3.46327	STC2	stanniocalcin 2	8614
205199_at	7.97e-08	3.22e-11	14.1934	15.7018	4.31226	CA9	carbonic anhydrase 9	768
218484_at	2.4e-07	1.51e-10	12.9241	14.29	6.59448	NDUFA4L2	NDUFA4, mitochondrial complex associated like 2	56901
210095_s_at	3.64e-07	2.51e-10	12.5254	13.8166	3.71977	IGFBP3	insulin like growth factor binding protein 3	3486
221870_at	9.2e-07	9.52e-10	11.5308	12.568	4.60127	EHD2	EH domain containing 2	30846
204279_at	9.84e-07	1.15e-09	11.3959	12.3907	2.09769	PSMB9	proteasome subunit beta 9	5698
202803_s_at	1.04e-06	1.31e-09	11.3024	12.2667	2.18419	ITGB2	integrin subunit beta 2	3689
45297_at	1.3e-06	1.78e-09	11.0839	11.9731	2.51721	EHD2	EH domain containing 2	30846
221009_s_at	1.78e-06	2.64e-09	10.8123	11.601	4.39298	ANGPTL4	angiopoietin like 4	51129
218084_x_at	1.93e-06	3.38e-09	10.6423	11.3637	2.01004	FXYD5	FXYD domain containing ion transport regulator 5	53827
206025_s_at	2.95e-06	6.35e-09	10.2211	10.7614	4.69637	TNFAIP6	TNF alpha induced protein 6	7130
202953_at	3.26e-06	7.47e-09	10.1143	10.6053	2.87169	C1QB	complement C1q B chain	713
213915_at	3.63e-06	8.96e-09	9.99508	10.4294	4.39559	NKG7	natural killer cell granule protein 7	4818
204924_at	3.66e-06	9.35e-09	9.9677	10.3888	1.97603	TLR2	toll like receptor 2	7097
221566_s_at	4.44e-06	1.2e-08	9.80874	10.151	4.25373	NOL3	nucleolar protein 3	8996
204416_x_at	4.7e-06	1.31e-08	9.75154	10.0647	4.53548	APOC1	apolipoprotein C1	341
219232_s_at	5.56e-06	1.64e-08	9.60886	9.84753	3.1016	EGLN3	egl-9 family hypoxia inducible factor 3	112399
201720_s_at	5.56e-06	1.65e-08	9.60507	9.84171	2.37588	LAPTM5	lysosomal protein transmembrane 5	7805
219593_at	6.85e-06	2.07e-08	9.46157	9.62064	3.32295	SLC15A3	solute carrier family 15 member 3	51296
218839_at	7.73e-06	2.47e-08	9.35157	9.44937	3.51254	HEY1	hes related family bHLH transcription factor with YRPW motif 1	23462
217984_at	7.73e-06	2.5e-08	9.34509	9.43922	3.36333	RNASET2	ribonuclease T2	8635
218232_at	7.76e-06	2.54e-08	9.33425	9.42226	1.89071	C1QA	complement C1q A chain	712
204232_at	9.94e-06	3.5e-08	9.13755	9.11162	1.67641	FCER1G	Fc fragment of IgE receptor Ig	2207
203470_s_at	9.94e-06	3.5e-08	9.1373	9.11122	2.32518	PLEK	pleckstrin	5341
209071_s_at	9.94e-06	3.52e-08	9.13331	9.10486	3.12339	RGS5	regulator of G-protein signaling 5	8490
218507_at	1.03e-05	3.78e-08	9.09022	9.0361	3.09713	HILPDA	hypoxia inducible lipid droplet associated	29923
211991_s_at	1.03e-05	3.83e-08	9.08275	9.02416	2.13476	HLA-DPA1	major histocompatibility complex, class II, DP alpha 1	3113
217983_s_at	1.03e-05	3.83e-08	9.08266	9.02402	3.47091	RNASET2	ribonuclease T2	8635
206508_at	1.03e-05	3.86e-08	9.07724	9.01535	3.23658	CD70	CD70 molecule	970
221567_at	1.29e-05	5.08e-08	8.91186	8.74887	2.65675	NOL3	nucleolar protein 3	8996
212143_s_at	1.35e-05	5.77e-08	8.83608	8.62556	3.35462	IGFBP3	insulin like growth factor binding protein 3	3486
201313_at	1.35e-05	5.79e-08	8.83347	8.62129	4.47642	ENO2	enolase 2	2026
203932_at	1.52e-05	6.8e-08	8.73789	8.46461	1.93727	HLA-DMB	major histocompatibility complex, class II, DM beta	3109
202998_s_at	1.57e-05	7.13e-08	8.70978	8.41828	2.53494	LOXL2	lysyl oxidase like 2	4017
210869_s_at	1.69e-05	7.82e-08	8.65549	8.32852	2.55401	MIR6756///MCAM	microRNA 6756///melanoma cell adhesion molecule	102465453///4162
218888_s_at	1.88e-05	9.21e-08	8.55913	8.16819	4.08127	NETO2	neuropilin and tolloid like 2	81831
206026_s_at	1.89e-05	9.32e-08	8.55258	8.15724	3.68672	TNFAIP6	TNF alpha induced protein 6	7130
204122_at	1.97e-05	9.82e-08	8.52182	8.10578	2.45446	TYROBP	TYRO protein tyrosine kinase binding protein	7305
203416_at	2.04e-05	1.04e-07	8.48818	8.04932	1.82572	CD53	CD53 molecule	963
202856_s_at	2.04e-05	1.05e-07	8.48506	8.04409	2.681	MIR6787///SLC16A3	microRNA 6787///solute carrier family 16 member 3	102465472///9123
209473_at	2.22e-05	1.16e-07	8.42298	7.93949	1.79819	ENTPD1	ectonucleoside triphosphate diphosphohydrolase 1	953
205859_at	2.41e-05	1.34e-07	8.34157	7.80151	2.02422	LY86	lymphocyte antigen 86	9450
221530_s_at	2.48e-05	1.4e-07	8.31601	7.75799	3.31635	BHLHE41	basic helix-loop-helix family member e41	79365
215446_s_at	2.59e-05	1.51e-07	8.27276	7.68415	3.42287	LOX	lysyl oxidase	4015
218804_at	3.6e-05	2.37e-07	8.01669	7.24162	1.8473	ANO1	anoctamin 1	55107
221840_at	3.73e-05	2.49e-07	7.98991	7.19478	1.82117	PTPRE	protein tyrosine phosphatase, receptor type E	5791
210512_s_at	3.73e-05	2.49e-07	7.98862	7.19254	1.80851	VEGFA	vascular endothelial growth factor A	7422
205258_at	3.84e-05	2.66e-07	7.95268	7.12953	2.8771	INHBB	inhibin beta B subunit	3625
212097_at	3.84e-05	2.68e-07	7.94885	7.12281	2.92782	CAV1	caveolin 1	857
200916_at	3.92e-05	2.82e-07	7.92054	7.07304	1.97964	TAGLN2	transgelin 2	8407
209040_s_at	3.92e-05	2.82e-07	7.91926	7.0708	2.96736	PSMB8	proteasome subunit beta 8	5696
213349_at	3.92e-05	2.84e-07	7.91505	7.06339	2.43254	TMCC1	transmembrane and coiled-coil domain family 1	23023
212484_at	3.92e-05	2.87e-07	7.90989	7.05429	2.40015	FAM89B	family with sequence similarity 89 member B	23625
212311_at	3.92e-05	2.91e-07	7.90265	7.04153	1.53847	SEL1L3	SEL1L family member 3	23231
201818_at	3.98e-05	3.02e-07	7.88249	7.00597	3.25092	LPCAT1	lysophosphatidylcholine acyltransferase 1	79888
214438_at	3.98e-05	3.02e-07	7.88138	7.00402	1.76399	HLX	H2.0 like homeobox	3142
202238_s_at	4.08e-05	3.11e-07	7.86537	6.97573	4.00242	LOC101928916///NNMT	uncharacterized LOC101928916///nicotinamide N-methyltransferase	101928916///4837
218149_s_at	4.12e-05	3.19e-07	7.85101	6.95033	1.97456	ZNF395	zinc finger protein 395	55893
217478_s_at	4.12e-05	3.22e-07	7.84607	6.94157	1.55051	HLA-DMA	major histocompatibility complex, class II, DM alpha	3108
219888_at	4.47e-05	3.53e-07	7.79549	6.85184	3.04721	SPAG4	sperm associated antigen 4	6676
216834_at	4.49e-05	3.58e-07	7.78664	6.8361	4.65291	RGS1	regulator of G-protein signaling 1	5996
214617_at	4.9e-05	4.02e-07	7.72351	6.72349	2.08972	PRF1	perforin 1	5551
203104_at	4.9e-05	4.02e-07	7.72341	6.72333	1.96765	CSF1R	colony stimulating factor 1 receptor	1436
209087_x_at	5.19e-05	4.43e-07	7.67046	6.62843	2.56089	MCAM	melanoma cell adhesion molecule	4162
218237_s_at	5.23e-05	4.48e-07	7.66354	6.61599	1.89659	SLC38A1	solute carrier family 38 member 1	81539
59625_at	5.34e-05	4.63e-07	7.64637	6.58514	1.99547	NOL3	nucleolar protein 3	8996
207414_s_at	5.34e-05	4.67e-07	7.64065	6.57484	3.26281	LOC100507472///PCSK6	uncharacterized LOC100507472///proprotein convertase subtilisin/kexin type 6	100507472///5046
201798_s_at	5.54e-05	5.07e-07	7.59608	6.49446	1.67399	MYOF	myoferlin	26509
209070_s_at	5.64e-05	5.31e-07	7.57081	6.44878	3.24691	RGS5	regulator of G-protein signaling 5	8490
208096_s_at	5.99e-05	5.75e-07	7.52779	6.37077	3.07991	COL21A1	collagen type XXI alpha 1 chain	81578
213010_at	5.99e-05	5.82e-07	7.52138	6.35912	1.7853	PRKCDBP	protein kinase C delta binding protein	112464
201105_at	6.36e-05	6.4e-07	7.47022	6.26596	2.65093	LGALS1	galectin 1	3956
202828_s_at	6.67e-05	6.79e-07	7.4377	6.20656	1.98466	MMP14	matrix metallopeptidase 14	4323
208790_s_at	6.89e-05	7.05e-07	7.418	6.17048	1.60606	PTRF	polymerase I and transcript release factor	284119
202497_x_at	6.9e-05	7.11e-07	7.41284	6.16104	3.20804	SLC2A3	solute carrier family 2 member 3	6515
210139_s_at	7.44e-05	7.91e-07	7.35564	6.05595	1.97952	PMP22	peripheral myelin protein 22	5376
204882_at	7.44e-05	7.97e-07	7.35185	6.04898	3.27129	ARHGAP25	Rho GTPase activating protein 25	9938
206584_at	7.44e-05	8e-07	7.34965	6.04492	2.06721	LY96	lymphocyte antigen 96	23643
209182_s_at	7.59e-05	8.2e-07	7.33626	6.02025	2.64542	C10orf10	chromosome 10 open reading frame 10	11067
214770_at	7.72e-05	8.46e-07	7.32019	5.9906	2.11545	MSR1	macrophage scavenger receptor 1	4481
204806_x_at	7.73e-05	8.5e-07	7.31729	5.98525	1.58903	HLA-F	major histocompatibility complex, class I, F	3134
203236_s_at	7.86e-05	8.71e-07	7.30421	5.96108	2.01475	LGALS9	galectin 9	3965
202237_at	7.87e-05	8.75e-07	7.30168	5.9564	3.93713	LOC101928916///NNMT	uncharacterized LOC101928916///nicotinamide N-methyltransferase	101928916///4837
202345_s_at	7.99e-05	8.93e-07	7.29103	5.9367	2.68152	FABP5	fatty acid binding protein 5	2171
201288_at	8.11e-05	9.13e-07	7.27897	5.91438	2.32521	ARHGDIB	Rho GDP dissociation inhibitor beta	397
204820_s_at	8.21e-05	9.28e-07	7.27029	5.89829	2.19851	BTN3A2///BTN3A3	butyrophilin subfamily 3 member A2///butyrophilin subfamily 3 member A3	11118///10384
202934_at	8.78e-05	1.02e-06	7.22232	5.80922	3.67361	HK2	hexokinase 2	3099
216950_s_at	9.35e-05	1.12e-06	7.17262	5.71659	1.85426	FCGR1CP///FCGR1B///FCGR1A	Fc fragment of IgG receptor Ic, pseudogene///Fc fragment of IgG receptor Ib///Fc fragment of IgG receptor Ia	100132417///2210///2209
213075_at	9.35e-05	1.12e-06	7.17187	5.71519	2.05678	OLFML2A	olfactomedin like 2A	169611
213553_x_at	9.35e-05	1.12e-06	7.17103	5.71362	2.56124	APOC1	apolipoprotein C1	341
208018_s_at	9.35e-05	1.12e-06	7.17067	5.71294	2.07386	HCK	HCK proto-oncogene, Src family tyrosine kinase	3055
219666_at	9.99e-05	1.24e-06	7.11885	5.61595	2.14005	MS4A6A	membrane spanning 4-domains A6A	64231
202748_at	0.000105	1.32e-06	7.08348	5.54953	2.0925	GBP2	guanylate binding protein 2	2634
201251_at	0.000105	1.32e-06	7.08322	5.54906	1.74274	PKM	pyruvate kinase, muscle	5315
202112_at	0.000107	1.35e-06	7.07312	5.53006	3.27321	VWF	von Willebrand factor	7450
205483_s_at	0.000107	1.37e-06	7.06434	5.51353	1.6629	ISG15	ISG15 ubiquitin-like modifier	9636
201819_at	0.000107	1.38e-06	7.061	5.50723	2.44675	SCARB1	scavenger receptor class B member 1	949
201037_at	0.00011	1.43e-06	7.04162	5.4707	2.51888	PFKP	phosphofructokinase, platelet	5214
202686_s_at	0.00011	1.43e-06	7.04075	5.46906	2.02929	AXL	AXL receptor tyrosine kinase	558
218353_at	0.000111	1.46e-06	7.03241	5.45332	2.35673	RGS5	regulator of G-protein signaling 5	8490
219594_at	0.000113	1.49e-06	7.02027	5.43039	2.73131	NINJ2	ninjurin 2	4815
200785_s_at	0.000115	1.52e-06	7.00951	5.41005	1.57247	LRP1	LDL receptor related protein 1	4035
203065_s_at	0.000116	1.55e-06	7.001	5.39396	2.89159	CAV1	caveolin 1	857
200872_at	0.00012	1.64e-06	6.96972	5.33471	1.6944	S100A10	S100 calcium binding protein A10	6281
200832_s_at	0.000122	1.67e-06	6.9611	5.31835	2.23277	SCD	stearoyl-CoA desaturase	6319
201721_s_at	0.000123	1.7e-06	6.95287	5.30271	2.15322	LAPTM5	lysosomal protein transmembrane 5	7805
203915_at	0.000124	1.72e-06	6.94621	5.29007	1.63733	CXCL9	C-X-C motif chemokine ligand 9	4283
203185_at	0.000126	1.78e-06	6.92678	5.25313	1.73089	RASSF2	Ras association domain family member 2	9770
210298_x_at	0.000127	1.8e-06	6.9229	5.24575	3.09997	FHL1	four and a half LIM domains 1	2273
203323_at	0.000127	1.8e-06	6.92093	5.24198	1.86187	CAV2	caveolin 2	858
201136_at	0.000132	1.9e-06	6.89469	5.192	2.24773	PLP2	proteolipid protein 2	5355
212992_at	0.000137	1.98e-06	6.87212	5.1489	3.40626	AHNAK2	AHNAK nucleoprotein 2	113146
217028_at	0.000137	1.99e-06	6.87022	5.14528	3.20815	CXCR4	C-X-C motif chemokine receptor 4	7852
210218_s_at	0.000137	2e-06	6.86623	5.13765	2.11207	SP100	SP100 nuclear antigen	6672
205898_at	0.000138	2.03e-06	6.85965	5.12506	1.90543	CX3CR1	C-X3-C motif chemokine receptor 1	1524
201847_at	0.00014	2.08e-06	6.84735	5.10154	1.65867	LIPA	lipase A, lysosomal acid type	3988
213100_at	0.00014	2.08e-06	6.84711	5.10108	2.52377	UNC5B	unc-5 netrin receptor B	219699
208965_s_at	0.00014	2.1e-06	6.84163	5.09059	1.81725	IFI16	interferon gamma inducible protein 16	3428
203645_s_at	0.000145	2.19e-06	6.81989	5.04891	2.13555	CD163	CD163 molecule	9332
204220_at	0.000146	2.24e-06	6.8086	5.02725	2.11763	GMFG	glia maturation factor gamma	9535
213566_at	0.000153	2.36e-06	6.78178	4.9757	2.0805	RNASE6	ribonuclease A family member k6	6039
209474_s_at	0.000159	2.49e-06	6.75461	4.9234	3.03193	ENTPD1	ectonucleoside triphosphate diphosphohydrolase 1	953
213351_s_at	0.00016	2.51e-06	6.75007	4.91465	2.44373	TMCC1	transmembrane and coiled-coil domain family 1	23023
201564_s_at	0.000161	2.55e-06	6.74309	4.90118	2.88743	FSCN1	fascin actin-bundling protein 1	6624
215002_at	0.000164	2.65e-06	6.7228	4.86202	2.56854	NPIPA5///NPIPB5///NPIPB11///NPIPB8///LOC613037///NPIPB4///NPIPB3	nuclear pore complex interacting protein family member A5///nuclear pore complex interacting protein family member B5///nuclear pore complex interacting protein family member B11///nuclear pore complex interacting protein family member B8///nuclear pore complex interacting protein member///nuclear pore complex interacting protein family member B4///nuclear pore complex interacting protein family …	100288332///100132247///728888///728734///613037///440345///23117
202957_at	0.000171	2.8e-06	6.69482	4.8079	1.78005	HCLS1	hematopoietic cell-specific Lyn substrate 1	3059
210495_x_at	0.000174	2.86e-06	6.684	4.78696	2.54764	FN1	fibronectin 1	2335
220362_at	0.000176	2.92e-06	6.67275	4.76514	1.80206	PSORS1C1	psoriasis susceptibility 1 candidate 1	170679
219719_at	0.000182	3.07e-06	6.64782	4.71676	2.50707	HIGD1B	HIG1 hypoxia inducible domain family member 1B	51751
213479_at	0.000188	3.19e-06	6.62871	4.67961	4.97161	NPTX2	neuronal pentraxin 2	4885
215049_x_at	0.000197	3.38e-06	6.59805	4.6199	2.13364	CD163	CD163 molecule	9332
216268_s_at	0.000202	3.51e-06	6.57982	4.58434	1.63711	JAG1	jagged 1	182
213537_at	0.000204	3.56e-06	6.57163	4.56836	1.78089	HLA-DPA1	major histocompatibility complex, class II, DP alpha 1	3113
209546_s_at	0.000205	3.6e-06	6.56721	4.55972	2.31611	APOL1	apolipoprotein L1	8542
202990_at	0.000209	3.68e-06	6.55546	4.53674	1.63215	PYGL	phosphorylase, glycogen, liver	5836
204900_x_at	0.000216	3.92e-06	6.52348	4.47414	2.02295	SAP30	Sin3A associated protein 30	8819
35820_at	0.000222	4.1e-06	6.50094	4.42993	2.10897	GM2A	GM2 ganglioside activator	2760
211148_s_at	0.000222	4.1e-06	6.50068	4.42942	4.26268	ANGPT2	angiopoietin 2	285
209846_s_at	0.000229	4.28e-06	6.4795	4.3878	2.0129	BTN3A2	butyrophilin subfamily 3 member A2	11118
205285_s_at	0.000236	4.46e-06	6.45812	4.34573	2.32885	FYB	FYN binding protein	2533
202887_s_at	0.000242	4.62e-06	6.44101	4.31203	2.28885	DDIT4	DNA damage inducible transcript 4	54541
205269_at	0.000243	4.67e-06	6.43492	4.30001	1.67621	LCP2	lymphocyte cytosolic protein 2	3937
201137_s_at	0.000248	4.8e-06	6.42122	4.27298	1.80208	HLA-DPB1	major histocompatibility complex, class II, DP beta 1	3115
221269_s_at	0.000249	4.83e-06	6.41836	4.26732	1.58204	SH3BGRL3	SH3 domain binding glutamate rich protein like 3	83442
201667_at	0.000249	4.84e-06	6.41724	4.26512	2.13014	GJA1	gap junction protein alpha 1	2697
205345_at	0.00025	4.86e-06	6.41517	4.26103	3.28228	BARD1	BRCA1 associated RING domain 1	580
202202_s_at	0.00025	4.89e-06	6.41261	4.25598	2.30719	LAMA4	laminin subunit alpha 4	3910
201939_at	0.000254	4.99e-06	6.40198	4.23497	2.08067	PLK2	polo like kinase 2	10769

## Sheet: GSE15641
ID	adj.P.Val	P.Value	t	B	logFC	Gene.symbol	Gene.title
32209_at	4.88e-51	2.19e-55	65.6551	115.318	3.22	FAM89B	family with sequence similarity 89 member B
160020_at	4.05e-50	3.63e-54	62.4537	112.689	3.58	MMP14	matrix metallopeptidase 14
65588_at	9.08e-48	1.22e-51	56.2985	107.183	3.37	SNHG17	small nucleolar RNA host gene 17
37424_at	6.98e-47	1.25e-50	54.0051	104.961	3.13	CCHCR1	coiled-coil alpha-helical rod protein 1
215895_x_at	1.29e-46	2.9e-50	53.1992	104.155	6.07	PLIN2	perilipin 2
52741_at	6.28e-45	1.69e-48	49.4596	100.24	2.9	TRMT61A	tRNA methyltransferase 61A
222052_at	1.03e-42	3.23e-46	44.9997	95.143	2.58	C19orf54	chromosome 19 open reading frame 54
210287_s_at	1.51e-41	5.41e-45	42.766	92.3908	4.02	FLT1	fms related tyrosine kinase 1
215383_x_at	6.17e-41	2.49e-44	41.5993	90.8946	4.01	SPG21	spastic paraplegia 21 (autosomal recessive, Mast syndrome)
214048_at	6.8e-41	3.07e-44	41.4424	90.6902	6.4	MBD4	methyl-CpG binding domain 4, DNA glycosylase
214745_at	6.8e-41	3.35e-44	41.3763	90.6038	3.3	PLCH1	phospholipase C eta 1
218720_x_at	1.31e-40	7.06e-44	40.8217	89.8738	2.92	SEZ6L2	seizure related 6 homolog like 2
222089_s_at	2.06e-40	1.2e-43	40.4284	89.35	2.41	C16orf71	chromosome 16 open reading frame 71
39891_at	4.9e-40	3.08e-43	39.7453	88.4281	1.84	ZNF710	zinc finger protein 710
210081_at	5.92e-40	4.1e-43	39.5391	88.1466	3.54	AGER	advanced glycosylation end-product specific receptor
213830_at	1.11e-39	8.94e-43	38.9814	87.3782	3.24	YME1L1	YME1 like 1 ATPase
40020_at	2.12e-39	1.81e-42	38.485	86.685	2.67	CELSR3	cadherin EGF LAG seven-pass G-type receptor 3
210786_s_at	7.19e-39	6.45e-42	37.6023	85.4304	3.1	FLI1	Fli-1 proto-oncogene, ETS transcription factor
217567_at	1.71e-38	1.64e-41	36.9663	84.5084	2.75	TGM4	transglutaminase 4
211463_at	1.71e-38	1.69e-41	36.9483	84.482	2.46	ZIC4	Zic family member 4
206409_at	1.84e-38	1.9e-41	36.8672	84.3634	2.9	TIAM1	T-cell lymphoma invasion and metastasis 1
222379_at	2.64e-38	2.84e-41	36.5977	83.9669	3.91	KCNE4	potassium voltage-gated channel subfamily E regulatory subunit 4
207548_at	3.65e-38	4.26e-41	36.3275	83.5666	3.58	LOC100996542///GRM7	uncharacterized LOC100996542///glutamate metabotropic receptor 7
217677_at	6.17e-38	7.47e-41	35.9562	83.0118	3.31	PLEKHA2	pleckstrin homology domain containing A2
212405_s_at	6.21e-38	7.83e-41	35.9255	82.9656	2.25	METTL13	methyltransferase like 13
214467_at	6.21e-38	8.08e-41	35.9045	82.934	3.04	GPR65	G protein-coupled receptor 65
209103_s_at	6.64e-38	8.94e-41	35.838	82.8339	2.64	UFD1L	ubiquitin fusion degradation 1 like (yeast)
218871_x_at	1.36e-37	1.89e-40	35.3511	82.0956	4.12	CSGALNACT2	chondroitin sulfate N-acetylgalactosaminyltransferase 2
211496_s_at	1.67e-37	2.4e-40	35.1947	81.8563	3.18	PDC	phosducin
213697_at	4.13e-37	6.11e-40	34.5964	80.9314	2.51	HIPK3	homeodomain interacting protein kinase 3
220459_at	4.7e-37	7.17e-40	34.4953	80.7737	2.63	MCM3AP-AS1	MCM3AP antisense RNA 1
217247_at	4.95e-37	7.77e-40	34.4443	80.6939	3.45
217078_s_at	1.15e-36	1.94e-39	33.869	79.7861	2.79	CD300A	CD300a molecule
213879_at	1.15e-36	1.97e-39	33.8611	79.7736	3.32
44783_s_at	2.94e-36	5.15e-39	33.2661	78.819	2.74	HEY1	hes related family bHLH transcription factor with YRPW motif 1
52837_at	2.98e-36	5.35e-39	33.2419	78.7799	2.21	KIAA1644	KIAA1644
210339_s_at	4.52e-36	8.51e-39	32.9587	78.3194	2.39	KLK2	kallikrein related peptidase 2
222335_at	4.59e-36	8.87e-39	32.9339	78.2789	3.34
206099_at	7.1e-36	1.43e-38	32.6431	77.802	2.62	PRKCH	protein kinase C eta
205100_at	7.74e-36	1.63e-38	32.565	77.6732	2.57	GFPT2	glutamine-fructose-6-phosphate transaminase 2
64064_at	1.1e-35	2.37e-38	32.3418	77.3035	1.96	GIMAP1-GIMAP5///GIMAP5	GIMAP1-GIMAP5 readthrough///GTPase, IMAP family member 5
217344_at	1.11e-35	2.43e-38	32.3258	77.2769	2.54
221852_at	1.12e-35	2.5e-38	32.308	77.2474	1.78
216368_s_at	1.14e-35	2.62e-38	32.2814	77.2031	2.17	COL4A3	collagen type IV alpha 3 chain
215158_s_at	1.51e-35	3.53e-38	32.1032	76.9057	2.38	DEDD	death effector domain containing
209628_at	2.89e-35	6.87e-38	31.7103	76.2447	2.47	NXT2	nuclear transport factor 2 like export factor 2
211768_at	4.62e-35	1.14e-37	31.4131	75.7394	1.96	LAT2	linker for activation of T-cells family member 2
214537_at	5.08e-35	1.28e-37	31.3484	75.6287	2.44	HIST1H1D	histone cluster 1, H1d
208414_s_at	6.06e-35	1.55e-37	31.235	75.4345	2.26	HOXB3	homeobox B3
216025_x_at	6.39e-35	1.66e-37	31.1948	75.3654	2.04	CYP2C9	cytochrome P450 family 2 subfamily C member 9
207044_at	6.61e-35	1.75e-37	31.1652	75.3146	1.51	THRB	thyroid hormone receptor beta
202691_at	7.41e-35	2.04e-37	31.0773	75.1632	2.2	SNRPD1	small nuclear ribonucleoprotein D1 polypeptide
212685_s_at	7.41e-35	2.06e-37	31.0699	75.1504	2.84	TBL2	transducin (beta)-like 2
219380_x_at	8.35e-35	2.36e-37	30.9923	75.0164	3.82	POLH	DNA polymerase eta
204211_x_at	1.44e-34	4.35e-37	30.6421	74.4078	2.26	EIF2AK2	eukaryotic translation initiation factor 2 alpha kinase 2
215740_at	1.44e-34	4.4e-37	30.6358	74.3966	2.94	LOC100130741	uncharacterized LOC100130741
220792_at	1.62e-34	5.02e-37	30.5606	74.2651	2.26	PRDM5	PR/SET domain 5
214861_at	2.05e-34	6.54e-37	30.4106	74.0019	2.35	KDM4C	lysine demethylase 4C
216882_s_at	2.43e-34	7.96e-37	30.2998	73.8065	2.14	NEBL	nebulette
211910_at	2.76e-34	9.18e-37	30.2191	73.6638	2.55
210675_s_at	3.33e-34	1.12e-36	30.1072	73.4654	3.03	PTPRR	protein tyrosine phosphatase, receptor type R
207724_s_at	5.32e-34	1.85e-36	29.8264	72.9647	3.03	SPAST	spastin
212059_s_at	5.32e-34	1.86e-36	29.8234	72.9594	1.9	TRPC4AP	transient receptor potential cation channel subfamily C member 4 associated protein
207338_s_at	6.17e-34	2.19e-36	29.734	72.799	2.04	ZNF200	zinc finger protein 200
207198_s_at	6.37e-34	2.29e-36	29.7077	72.7517	2.5	LIMS4///LIMS1	LIM zinc finger domain containing 4///LIM zinc finger domain containing 1
213415_at	6.37e-34	2.32e-36	29.702	72.7415	2.35	CLIC2	chloride intracellular channel 2
215293_s_at	1.21e-33	4.57e-36	29.3273	72.0638	1.69	PGAP2	post-GPI attachment to proteins 2
204943_at	1.51e-33	5.86e-36	29.191	71.8154	2	ADAM12	ADAM metallopeptidase domain 12
210140_at	1.51e-33	5.89e-36	29.1888	71.8113	2.97	CST7	cystatin F
221634_at	1.93e-33	7.62e-36	29.0481	71.5537	2.71	RPL23AP7///CENPBD1P1	ribosomal protein L23a pseudogene 7///CENPB DNA-binding domains containing 1 pseudogene 1
209315_at	2.14e-33	8.55e-36	28.986	71.4398	3.08	HBS1L	HBS1 like translational GTPase
44563_at	2.75e-33	1.11e-35	28.8448	71.1796	1.62	WRAP53	WD repeat containing antisense to TP53
215301_at	3.29e-33	1.38e-35	28.7261	70.9599	2.89	SYCE1L	synaptonemal complex central element protein 1 like
220725_x_at	3.29e-33	1.39e-35	28.7237	70.9554	3.2	DNAH3	dynein axonemal heavy chain 3
217469_at	3.87e-33	1.65e-35	28.6306	70.7826	1.75	IGH	immunoglobulin heavy locus
204911_s_at	4.29e-33	1.9e-35	28.5543	70.6406	2.39	TRIM3	tripartite motif containing 3
202638_s_at	4.42e-33	1.98e-35	28.532	70.5991	2.59	ICAM1	intercellular adhesion molecule 1
209244_s_at	4.5e-33	2.04e-35	28.5177	70.5724	1.99	KIF1C	kinesin family member 1C
216205_s_at	5.22e-33	2.44e-35	28.4225	70.3945	2.81	MFN2	mitofusin 2
207973_x_at	5.27e-33	2.5e-35	28.4082	70.3678	1.82	ACRV1	acrosomal vesicle protein 1
201252_at	5.85e-33	2.81e-35	28.347	70.253	2.32	PSMC4	proteasome 26S subunit, ATPase 4
203362_s_at	5.91e-33	2.87e-35	28.3359	70.2322	3.54	MAD2L1	MAD2 mitotic arrest deficient-like 1 (yeast)
207991_x_at	5.99e-33	2.93e-35	28.3243	70.2105	1.75	ACRV1	acrosomal vesicle protein 1
206150_at	6.3e-33	3.11e-35	28.2923	70.1503	2.51	CD27	CD27 molecule
211413_s_at	1.05e-32	5.4e-35	28.0005	69.5995	2.67	PADI4	peptidyl arginine deiminase 4
54037_at	1.25e-32	6.56e-35	27.8985	69.4056	2.46	HPS4	HPS4, biogenesis of lysosomal organelles complex 3 subunit 2
214263_x_at	1.26e-32	6.66e-35	27.8906	69.3907	2.09	POLR2C	RNA polymerase II subunit C
219056_at	1.36e-32	7.24e-35	27.8467	69.307	2.49	RNASEH2B	ribonuclease H2 subunit B
208585_at	1.42e-32	7.62e-35	27.8197	69.2555	2.36	BTN2A3P	butyrophilin subfamily 2 member A3, pseudogene
201819_at	2.09e-32	1.16e-34	27.5991	68.8332	3.66	SCARB1	scavenger receptor class B member 1
219266_at	2.19e-32	1.23e-34	27.5701	68.7774	2	ZNF350	zinc finger protein 350
209851_at	2.39e-32	1.37e-34	27.5122	68.666	1.85	ZC3H13	zinc finger CCCH-type containing 13
214592_s_at	2.66e-32	1.54e-34	27.4529	68.5516	2.31	SNAPC5	small nuclear RNA activating complex polypeptide 5
207085_x_at	2.7e-32	1.58e-34	27.4412	68.529	2.63	CSF2RA	colony stimulating factor 2 receptor alpha subunit
218637_at	2.83e-32	1.66e-34	27.4139	68.4762	2.97	IMPACT	impact RWD domain protein
203111_s_at	4.42e-32	2.68e-34	27.1682	67.9995	1.97	PTK2B	protein tyrosine kinase 2 beta
213755_s_at	4.74e-32	2.89e-34	27.1293	67.9236	1.95	SKI	SKI proto-oncogene
211579_at	5.14e-32	3.16e-34	27.0837	67.8345	2.17	ITGB3	integrin subunit beta 3
208496_x_at	5.43e-32	3.41e-34	27.044	67.757	2.06	HIST1H3G	histone cluster 1, H3g
206740_x_at	5.98e-32	3.78e-34	26.9917	67.6545	2.24	SYCP1	synaptonemal complex protein 1
211993_at	6.08e-32	3.87e-34	26.9798	67.6312	2.12	WNK1	WNK lysine deficient protein kinase 1
206873_at	9.19e-32	5.98e-34	26.759	67.1967	2.46	CA6	carbonic anhydrase 6
34726_at	1.55e-31	1.04e-33	26.481	66.6452	2.35	CACNB3	calcium voltage-gated channel auxiliary subunit beta 3
204786_s_at	1.9e-31	1.3e-33	26.3699	66.4234	2.89	IFNAR2	interferon alpha and beta receptor subunit 2
210164_at	2.18e-31	1.5e-33	26.2977	66.2788	2.77	GZMB	granzyme B
207694_at	2.32e-31	1.6e-33	26.2634	66.2099	2.16	POU3F4	POU class 3 homeobox 4
206032_at	2.58e-31	1.8e-33	26.2049	66.0925	2.79	DSC3	desmocollin 3
211515_s_at	2.69e-31	1.89e-33	26.1805	66.0432	2.37	DSTYK	dual serine/threonine and tyrosine protein kinase
210821_x_at	3.64e-31	2.58e-33	26.0271	65.7337	1.65	CENPA	centromere protein A
206111_at	3.99e-31	2.87e-33	25.975	65.6283	2.44	RNASE2	ribonuclease A family member 2
205159_at	4.25e-31	3.07e-33	25.9411	65.5595	2.24	CSF2RB	colony stimulating factor 2 receptor beta common subunit
221530_s_at	5.36e-31	3.9e-33	25.8237	65.3208	4.73	BHLHE41	basic helix-loop-helix family member e41
222152_at	5.52e-31	4.06e-33	25.8042	65.281	2.28	PDCD6	programmed cell death 6
208802_at	6.22e-31	4.6e-33	25.7423	65.1546	2.13	SRP72	signal recognition particle 72
217733_s_at	6.22e-31	4.63e-33	25.7393	65.1485	2.22	TMSB10	thymosin beta 10
220086_at	7.76e-31	5.89e-33	25.6221	64.9087	2.1	IKZF5	IKAROS family zinc finger 5
220601_at	9.66e-31	7.37e-33	25.5126	64.6836	2.21	C16orf70	chromosome 16 open reading frame 70
221640_s_at	1.49e-30	1.16e-32	25.2927	64.2291	2.09	PIDD1	p53-induced death domain protein 1
217953_at	1.76e-30	1.39e-32	25.2061	64.0493	2.96	PHF3	PHD finger protein 3
222077_s_at	1.97e-30	1.56e-32	25.149	63.9304	3.76	RACGAP1	Rac GTPase activating protein 1
204110_at	2.58e-30	2.09e-32	25.0104	63.6407	2	HNMT	histamine N-methyltransferase
208307_at	2.85e-30	2.32e-32	24.9606	63.5364	1.76	RBMY1J///RBMY1E///RBMY1D///RBMY1B///RBMY1F///RBMY1A1	RNA binding motif protein, Y-linked, family 1, member J///RNA binding motif protein, Y-linked, family 1, member E///RNA binding motif protein, Y-linked, family 1, member D///RNA binding motif protein, Y-linked, family 1, member B///RNA binding motif protein, Y-linked, family 1, member F///RNA binding motif protein, Y-linked, family 1, member A1
221890_at	2.88e-30	2.35e-32	24.9535	63.5213	1.64	ZNF335	zinc finger protein 335
219489_s_at	2.97e-30	2.44e-32	24.9357	63.4841	2.32	NXN	nucleoredoxin
210144_at	3.48e-30	2.87e-32	24.8585	63.3216	2.13	TBC1D22A	TBC1 domain family member 22A
207682_s_at	3.91e-30	3.25e-32	24.8003	63.199	2.34	KIF25	kinesin family member 25
217582_at	5.32e-30	4.49e-32	25.4245	62.9143	5.44
220420_at	5.39e-30	4.57e-32	24.6379	62.8555	2.16	LMAN1L	lectin, mannose binding 1 like
211484_s_at	5.43e-30	4.63e-32	24.6318	62.8426	2.3	DSCAM	DS cell adhesion molecule
214961_at	6.11e-30	5.29e-32	24.5692	62.7096	2.53	MTUS2	microtubule associated tumor suppressor candidate 2
216547_at	6.15e-30	5.36e-32	24.5632	62.6967	1.52
45633_at	8.79e-30	7.81e-32	24.3862	62.3191	2.47	GINS3	GINS complex subunit 3
202585_s_at	9.49e-30	8.56e-32	24.3433	62.2272	2.38	NFX1	nuclear transcription factor, X-box binding 1
216417_x_at	9.56e-30	8.66e-32	24.3376	62.215	2.21	HOXB9	homeobox B9
206918_s_at	9.96e-30	9.07e-32	24.316	62.1688	2.3	CPNE1	copine 1
1431_at	1.12e-29	1.03e-31	24.2569	62.0418	2.73	CYP2E1	cytochrome P450 family 2 subfamily E member 1
211224_s_at	1.22e-29	1.12e-31	24.2162	61.9541	1.93	ABCB11	ATP binding cassette subfamily B member 11
AFFX-ThrX-5_at	1.36e-29	1.26e-31	24.1628	61.8391	1.56
220716_at	1.52e-29	1.42e-31	24.1068	61.7183	2.41	ERCC8	ERCC excision repair 8, CSA ubiquitin ligase complex subunit
205909_at	1.55e-29	1.46e-31	24.0958	61.6945	1.58	POLE2	DNA polymerase epsilon 2, accessory subunit
217984_at	1.79e-29	1.69e-31	24.0261	61.5435	3.54	RNASET2	ribonuclease T2
218227_at	1.82e-29	1.73e-31	24.016	61.5217	1.98	NUBP2	nucleotide binding protein 2
213358_at	1.87e-29	1.8e-31	23.9977	61.4819	2.3	MTCL1	microtubule crosslinking factor 1
218244_at	1.97e-29	1.92e-31	23.9682	61.4179	1.93	NOL8	nucleolar protein 8
204146_at	1.97e-29	1.92e-31	23.968	61.4175	2.43	RAD51AP1	RAD51 associated protein 1
222075_s_at	1.99e-29	1.94e-31	23.9624	61.4055	1.95	OAZ3	ornithine decarboxylase antizyme 3
207365_x_at	2.3e-29	2.28e-31	23.8884	61.2443	2.6	USP34	ubiquitin specific peptidase 34
216161_at	2.42e-29	2.43e-31	23.8592	61.1808	1.97	SBNO1	strawberry notch homolog 1
219583_s_at	2.46e-29	2.49e-31	23.8487	61.1579	2.65	SPATA7	spermatogenesis associated 7
201288_at	2.74e-29	2.79e-31	23.7954	61.0416	1.99	ARHGDIB	Rho GDP dissociation inhibitor beta
214282_at	2.75e-29	2.81e-31	23.7927	61.0356	5.53
215758_x_at	3.58e-29	3.73e-31	23.6629	60.7514	1.94	ZNF93	zinc finger protein 93
217215_s_at	3.97e-29	4.17e-31	23.6123	60.6401	1.99
219301_s_at	3.97e-29	4.17e-31	23.6118	60.6391	1.75	CNTNAP2	contactin associated protein-like 2
206881_s_at	4.33e-29	4.6e-31	23.5669	60.5402	1.77	LILRA3	leukocyte immunoglobulin like receptor A3
215536_at	4.59e-29	4.91e-31	23.5379	60.4763	2.15	HLA-DQB2	major histocompatibility complex, class II, DQ beta 2
215324_at	4.71e-29	5.06e-31	23.5243	60.4462	2.14	SEMA3D	semaphorin 3D
206375_s_at	5.48e-29	5.91e-31	23.4538	60.2907	1.9	HSPB3	heat shock protein family B (small) member 3
208030_s_at	6.24e-29	6.83e-31	23.3877	60.1442	2.33	ADD1	adducin 1
205023_at	7.47e-29	8.32e-31	23.2989	59.947	2.03	RAD51	RAD51 recombinase
204971_at	8.8e-29	9.85e-31	23.2227	59.7773	3.12	CSTA	cystatin A
218985_at	1.09e-28	1.23e-30	23.1243	59.5576	2.04	SLC2A8	solute carrier family 2 member 8
208874_x_at	1.15e-28	1.31e-30	23.0942	59.49	2.34	PTPA	protein phosphatase 2 phosphatase activator
215870_s_at	1.25e-28	1.45e-30	23.0496	59.3901	1.95	PLA2G5	phospholipase A2 group V
217393_x_at	1.67e-28	1.94e-30	22.919	59.0965	1.73	UBE2NL	ubiquitin conjugating enzyme E2 N like (gene/pseudogene)
215490_at	1.99e-28	2.34e-30	22.8367	58.9107	2.19	IBA57	IBA57 homolog, iron-sulfur cluster assembly
216378_at	2.03e-28	2.39e-30	22.8266	58.8877	2.81
203713_s_at	2.09e-28	2.47e-30	22.812	58.8546	2.21	LLGL2	LLGL2, scribble cell polarity complex component
212097_at	2.22e-28	2.64e-30	22.7827	58.7884	3.71	CAV1	caveolin 1
201020_at	2.23e-28	2.67e-30	22.7784	58.7786	2.5	YWHAH	tyrosine 3-monooxygenase/tryptophan 5-monooxygenase activation protein eta
213965_s_at	2.84e-28	3.43e-30	22.667	58.5257	1.56	CHD5	chromodomain helicase DNA binding protein 5
210617_at	2.87e-28	3.48e-30	22.6611	58.5124	1.91	PHEX	phosphate regulating endopeptidase homolog, X-linked
222241_at	3.21e-28	3.92e-30	22.6085	58.3926	2.09	MVB12B	multivesicular body subunit 12B
208037_s_at	3.67e-28	4.49e-30	22.5482	58.2548	1.53	MADCAM1	mucosal vascular addressin cell adhesion molecule 1
220017_x_at	3.84e-28	4.74e-30	22.5241	58.1998	1.67	CYP2C9	cytochrome P450 family 2 subfamily C member 9
208443_x_at	4.13e-28	5.13e-30	22.4898	58.1213	2.5	SHOX2	short stature homeobox 2
202676_x_at	4.72e-28	5.98e-30	22.423	57.9681	2.28	FASTK	Fas activated serine/threonine kinase
206222_at	5.73e-28	7.33e-30	22.3338	57.763	1.59	TNFRSF10C	TNF receptor superfamily member 10c
207240_s_at	6.72e-28	8.72e-30	22.2585	57.5894	2.52	LHCGR	luteinizing hormone/choriogonadotropin receptor
213513_x_at	7.35e-28	9.56e-30	22.2183	57.4964	1.61	ARPC2	actin related protein 2/3 complex subunit 2
219262_at	7.48e-28	9.77e-30	22.209	57.4749	1.9	SUV39H2	suppressor of variegation 3-9 homolog 2
204024_at	7.67e-28	1.01e-29	22.1964	57.4459	1.78	OSGIN2	oxidative stress induced growth inhibitor family member 2
210210_at	8e-28	1.05e-29	22.1768	57.4005	2.62	MPZL1	myelin protein zero like 1
208004_at	1.16e-27	1.55e-29	22.0095	57.0118	1.79	OPRPN	opiorphin prepropeptide
208253_at	1.25e-27	1.67e-29	21.9781	56.9387	1.88	SIGLEC8	sialic acid binding Ig like lectin 8
208366_at	1.71e-27	2.31e-29	21.8379	56.6107	2.66	PCDH11X	protocadherin 11 X-linked
205144_at	1.77e-27	2.4e-29	21.8211	56.5712	1.75	MFSD7	major facilitator superfamily domain containing 7
221583_s_at	2.66e-27	3.7e-29	21.6366	56.1369	2.09	KCNMA1	potassium calcium-activated channel subfamily M alpha 1
221240_s_at	2.96e-27	4.14e-29	21.5893	56.0249	1.6	B3GNT4	UDP-GlcNAc:betaGal beta-1,3-N-acetylglucosaminyltransferase 4
206072_at	3.09e-27	4.37e-29	21.5665	55.9709	1.83	UCN	urocortin
222189_at	3.17e-27	4.49e-29	21.5544	55.9422	1.69	AMBRA1	autophagy and beclin 1 regulator 1
214687_x_at	3.83e-27	5.49e-29	21.4698	55.7414	1.55	ALDOA	aldolase, fructose-bisphosphate A
44673_at	4e-27	5.75e-29	21.45	55.6945	1.66	SIGLEC1	sialic acid binding Ig like lectin 1
220885_s_at	4.23e-27	6.09e-29	21.4257	55.6366	1.82	CENPJ	centromere protein J
211252_x_at	4.87e-27	7.03e-29	21.3651	55.4922	1.81	PTCRA	pre T-cell antigen receptor alpha
202237_at	5.03e-27	7.29e-29	21.3503	55.4566	4.35	LOC101928916///NNMT	uncharacterized LOC101928916///nicotinamide N-methyltransferase
205742_at	5.25e-27	7.65e-29	21.3298	55.4077	1.59	TNNI3	troponin I3, cardiac type
201923_at	5.37e-27	7.86e-29	21.3186	55.3809	2.6	PRDX4	peroxiredoxin 4
214161_at	5.56e-27	8.16e-29	21.3027	55.343	1.92	OSGIN2	oxidative stress induced growth inhibitor family member 2
210599_at	6.06e-27	8.95e-29	21.2641	55.2505	1.88	ZNF614	zinc finger protein 614
206761_at	6.55e-27	9.82e-29	21.225	55.1567	2.05	CD96	CD96 molecule
213117_at	6.62e-27	9.95e-29	21.2196	55.1439	2.16	KLHL9	kelch like family member 9
217426_at	7.21e-27	1.09e-28	21.1803	55.0494	1.99
203889_at	7.65e-27	1.16e-28	21.1542	54.9866	2.4	SCG5	secretogranin V
210095_s_at	7.68e-27	1.17e-28	21.151	54.9789	3.15	IGFBP3	insulin like growth factor binding protein 3
203130_s_at	8.05e-27	1.25e-28	21.1253	54.9171	2.1	KIF5C	kinesin family member 5C
211184_s_at	9.61e-27	1.5e-28	21.0493	54.734	2.5	USH1C	USH1 protein network component harmonin
213437_at	1.1e-26	1.72e-28	20.9915	54.5943	2.04	RUFY3	RUN and FYVE domain containing 3
222016_s_at	1.16e-26	1.83e-28	20.9667	54.534	1.88	ZSCAN31	zinc finger and SCAN domain containing 31
215190_at	1.22e-26	1.93e-28	20.9436	54.4781	1.9	EIF3M	eukaryotic translation initiation factor 3 subunit M
216867_s_at	1.26e-26	2.01e-28	20.9276	54.4392	1.72	PDGFA	platelet derived growth factor subunit A
209909_s_at	1.38e-26	2.21e-28	20.8869	54.3405	2.34	TGFB2	transforming growth factor beta 2
222196_at	1.45e-26	2.34e-28	20.8647	54.2864	3.41	LOC389906	zinc finger protein 839 pseudogene
205966_at	1.61e-26	2.61e-28	20.8185	54.1739	2.74	TAF13	TATA-box binding protein associated factor 13
210061_at	2.21e-26	3.64e-28	20.6818	53.8403	1.99	ZNF589	zinc finger protein 589
220632_s_at	2.8e-26	4.7e-28	20.5774	53.5841	2.44	POMT2	protein O-mannosyltransferase 2
216721_at	2.83e-26	4.76e-28	20.5718	53.5703	1.61	SLC25A30	solute carrier family 25 member 30
206008_at	3.05e-26	5.17e-28	20.538	53.487	1.64	TGM1	transglutaminase 1
212984_at	3.52e-26	6.01e-28	20.4769	53.3364	2.81	ATF2	activating transcription factor 2
219230_at	3.89e-26	6.66e-28	20.4354	53.2339	2.55	TMEM100	transmembrane protein 100
219120_at	3.91e-26	6.7e-28	20.4327	53.2272	1.73	WDCP	WD repeat and coiled coil containing
208258_s_at	4.98e-26	8.63e-28	20.3301	52.9731	2.01	GAS2L1	growth arrest specific 2 like 1
201029_s_at	5.08e-26	8.83e-28	20.3207	52.9498	2.01	CD99	CD99 molecule
221933_at	5.09e-26	8.86e-28	20.3192	52.9462	2.72	NLGN4X	neuroligin 4, X-linked
203324_s_at	5.24e-26	9.15e-28	20.3063	52.9141	2.98	CAV2	caveolin 2
200966_x_at	5.4e-26	9.46e-28	20.2928	52.8804	1.58	ALDOA	aldolase, fructose-bisphosphate A
202803_s_at	5.72e-26	1.01e-27	20.2677	52.8181	2.58	ITGB2	integrin subunit beta 2
215275_at	5.95e-26	1.06e-27	20.2474	52.7677	2.13	TRAF3IP3	TRAF3 interacting protein 3
218164_at	6.45e-26	1.15e-27	20.213	52.682	2.53	SPATA20	spermatogenesis associated 20
202238_s_at	6.61e-26	1.19e-27	20.201	52.6521	4.26	LOC101928916///NNMT	uncharacterized LOC101928916///nicotinamide N-methyltransferase
213923_at	9.54e-26	1.76e-27	20.0439	52.259	2.02	RAP2B	RAP2B, member of RAS oncogene family
200788_s_at	9.99e-26	1.84e-27	20.0244	52.2101	1.53	PEA15	phosphoprotein enriched in astrocytes 15
217937_s_at	1.12e-25	2.07e-27	19.9774	52.092	1.89	HDAC7	histone deacetylase 7
217028_at	1.13e-25	2.09e-27	19.9738	52.0829	3.48	CXCR4	C-X-C motif chemokine receptor 4
219596_at	1.37e-25	2.54e-27	19.8957	51.8861	1.59	THAP10	THAP domain containing 10
203233_at	1.39e-25	2.59e-27	19.888	51.8667	2.34	IL4R	interleukin 4 receptor
217522_at	1.49e-25	2.82e-27	19.8551	51.7836	1.96	KCNV2	potassium voltage-gated channel modifier subfamily V member 2
202953_at	1.53e-25	2.9e-27	19.8439	51.7554	3.79	C1QB	complement C1q B chain
209632_at	1.55e-25	2.94e-27	19.8386	51.742	3.34	PPP2R3A	protein phosphatase 2 regulatory subunit B''alpha
200665_s_at	1.68e-25	3.22e-27	19.8018	51.6488	2.23	SPARC	secreted protein acidic and cysteine rich
219563_at	1.74e-25	3.35e-27	19.7866	51.6104	1.63	SYNE3///LINC00341	spectrin repeat containing nuclear envelope family member 3///long intergenic non-protein coding RNA 341
213166_x_at	2.08e-25	4.03e-27	19.7124	51.422	1.8	MIR4784///MZT2A///MZT2B	microRNA 4784///mitotic spindle organizing protein 2A///mitotic spindle organizing protein 2B
219074_at	2.24e-25	4.38e-27	19.68	51.3395	1.78	TMEM184C	transmembrane protein 184C
211072_x_at	2.33e-25	4.58e-27	19.6626	51.2954	1.71	TUBA1B	tubulin alpha 1b
200822_x_at	2.81e-25	5.62e-27	19.5818	51.0892	1.57	TPI1	triosephosphate isomerase 1
202052_s_at	2.85e-25	5.71e-27	19.5754	51.073	2.03	RAI14	retinoic acid induced 14
214595_at	3.08e-25	6.21e-27	19.5421	50.9879	1.9	KCNG1	potassium voltage-gated channel modifier subfamily G member 1
219519_s_at	3.13e-25	6.35e-27	19.5335	50.9657	1.57	SIGLEC1	sialic acid binding Ig like lectin 1
206792_x_at	3.3e-25	6.74e-27	19.51	50.9056	2.18	LOC729966///PDE4C	uncharacterized LOC729966///phosphodiesterase 4C
213208_at	3.34e-25	6.86e-27	19.5033	50.8885	2.07	GLTSCR1L	GLTSCR1 like
203484_at	4.79e-25	9.98e-27	19.3563	50.5109	2.12	SEC61G	Sec61 translocon gamma subunit
204963_at	5.48e-25	1.15e-26	19.3002	50.3662	2.51	SSPN	sarcospan
41469_at	5.71e-25	1.21e-26	19.2817	50.3184	2.49	PI3	peptidase inhibitor 3
222263_at	5.99e-25	1.27e-26	19.2611	50.2651	1.88	SLC35E1	solute carrier family 35 member E1
212976_at	5.99e-25	1.28e-26	19.2605	50.2635	1.79	LRRC8B	leucine rich repeat containing 8 family member B
211623_s_at	6.33e-25	1.36e-26	19.2368	50.2022	1.76	FBL	fibrillarin
211424_x_at	6.33e-25	1.36e-26	19.2354	50.1986	3.59	METTL7A	methyltransferase like 7A
206585_at	6.7e-25	1.45e-26	19.2117	50.1373	1.69	MKRN3	makorin ring finger protein 3
211926_s_at	7.37e-25	1.59e-26	19.1741	50.0398	2.67	MYH9	myosin, heavy chain 9, non-muscle
210604_at	7.52e-25	1.64e-26	19.1632	50.0114	1.89	GNAT2	G protein subunit alpha transducin 2
221739_at	8.6e-25	1.89e-26	19.109	49.8708	1.73	MYDGF	myeloid derived growth factor
213769_at	1.05e-24	2.34e-26	19.0262	49.655	1.72	KSR1	kinase suppressor of ras 1
211058_x_at	1.09e-24	2.43e-26	19.0118	49.6172	1.73	TUBA1B	tubulin alpha 1b
202957_at	1.11e-24	2.48e-26	19.0036	49.5959	2.34	HCLS1	hematopoietic cell-specific Lyn substrate 1
204314_s_at	1.19e-24	2.67e-26	18.9746	49.52	2.37	CREB1	cAMP responsive element binding protein 1
211092_s_at	1.22e-24	2.75e-26	18.9643	49.4932	1.61	NF2	neurofibromin 2
213181_s_at	1.3e-24	2.94e-26	18.9378	49.4238	2.34	MOCS1	molybdenum cofactor synthesis 1
210150_s_at	1.45e-24	3.31e-26	18.8925	49.305	2.59	LAMA5	laminin subunit alpha 5
35820_at	1.65e-24	3.8e-26	18.8401	49.1674	1.55	GM2A	GM2 ganglioside activator
204885_s_at	1.65e-24	3.81e-26	18.8387	49.1637	2.89	MSLN	mesothelin
202823_at	1.83e-24	4.24e-26	18.7975	49.0554	2.46	TCEB1	transcription elongation factor B subunit 1
219597_s_at	1.88e-24	4.38e-26	18.7853	49.0233	1.92	DUOX1	dual oxidase 1
206332_s_at	1.89e-24	4.42e-26	18.7815	49.0132	2.52	IFI16	interferon gamma inducible protein 16
220913_at	1.95e-24	4.57e-26	18.7693	48.981	1.57
210435_at	2.15e-24	5.09e-26	18.7281	48.8723	1.96	ARL17B///ARL17A	ADP ribosylation factor like GTPase 17B///ADP ribosylation factor like GTPase 17A
202519_at	2.21e-24	5.25e-26	18.716	48.8404	2.09	MLXIP	MLX interacting protein
221344_at	2.21e-24	5.26e-26	18.7156	48.8394	1.58	OR12D2	olfactory receptor family 12 subfamily D member 2 (gene/pseudogene)
208966_x_at	2.83e-24	6.76e-26	18.6201	48.5867	2.45	IFI16	interferon gamma inducible protein 16
206605_at	3.04e-24	7.29e-26	18.5913	48.5101	2.03	ENDOU	endonuclease, poly(U) specific
208130_s_at	3.06e-24	7.36e-26	18.588	48.5015	1.92	TBXAS1	thromboxane A synthase 1
213248_at	3.28e-24	7.93e-26	18.5595	48.4256	1.89	LOC730101	uncharacterized LOC730101
214372_x_at	3.83e-24	9.36e-26	18.497	48.2595	1.63	ERN2	endoplasmic reticulum to nucleus signaling 2
201818_at	3.9e-24	9.54e-26	18.4897	48.24	3.05	LPCAT1	lysophosphatidylcholine acyltransferase 1
207090_x_at	4e-24	9.81e-26	18.4793	48.2122	1.68	ZFP30	ZFP30 zinc finger protein
207988_s_at	4.14e-24	1.02e-25	18.4655	48.1753	1.61	ARPC2	actin related protein 2/3 complex subunit 2
201090_x_at	4.42e-24	1.09e-25	18.4391	48.1051	1.82	TUBA1B	tubulin alpha 1b
214858_at	4.96e-24	1.24e-25	18.3917	47.9782	1.94	PP14571	uncharacterized LOC100130449
211325_x_at	5.04e-24	1.26e-25	18.384	47.9577	2.99	DSTNP2	destrin, actin depolymerizing factor pseudogene 2
218554_s_at	5.36e-24	1.35e-25	18.3599	47.8931	1.67	ASH1L	ASH1 like histone lysine methyltransferase
203768_s_at	5.37e-24	1.35e-25	18.3583	47.8888	1.8	STS	steroid sulfatase (microsomal), isozyme S
214564_s_at	5.55e-24	1.41e-25	18.3429	47.8476	2.08	PCDHGC3	protocadherin gamma subfamily C, 3
217452_s_at	5.61e-24	1.43e-25	18.3367	47.8309	2.38	B3GALT2	beta-1,3-galactosyltransferase 2
201642_at	6.92e-24	1.8e-25	18.2516	47.6023	1.55	IFNGR2	interferon gamma receptor 2 (interferon gamma transducer 1)
208072_s_at	7.25e-24	1.89e-25	18.233	47.5523	1.79	DGKD	diacylglycerol kinase delta
221566_s_at	8.56e-24	2.24e-25	18.1694	47.3807	2.53	NOL3	nucleolar protein 3
202117_at	9.23e-24	2.43e-25	18.1387	47.2979	1.52	ARHGAP1	Rho GTPase activating protein 1
214476_at	1.07e-23	2.86e-25	18.0789	47.136	1.99	TFF2	trefoil factor 2
201623_s_at	1.09e-23	2.91e-25	18.0725	47.1189	1.51	DARS	aspartyl-tRNA synthetase
203535_at	1.25e-23	3.34e-25	18.0213	46.9799	2.84	S100A9	S100 calcium binding protein A9
212251_at	1.26e-23	3.4e-25	18.0149	46.9624	1.78	MTDH	metadherin
208812_x_at	1.39e-23	3.75e-25	17.978	46.8621	1.53	HLA-C	major histocompatibility complex, class I, C
210033_s_at	1.45e-23	3.93e-25	17.9605	46.8148	1.66	SPAG6	sperm associated antigen 6
215894_at	1.51e-23	4.1e-25	17.9446	46.7714	1.71	PTGDR	prostaglandin D2 receptor
212737_at	1.64e-23	4.45e-25	17.9151	46.6908	1.88	GM2A	GM2 ganglioside activator
215991_s_at	1.67e-23	4.54e-25	17.9075	46.6702	1.78	EMC1	ER membrane protein complex subunit 1
216383_at	1.69e-23	4.62e-25	17.9012	46.6531	1.76
205951_at	1.91e-23	5.26e-25	17.8533	46.5223	2.53	MYH1	myosin heavy chain 1
219813_at	1.96e-23	5.42e-25	17.8418	46.4909	1.81	LATS1	large tumor suppressor kinase 1
221111_at	1.96e-23	5.43e-25	17.8417	46.4904	2.51	IL26	interleukin 26
214096_s_at	2.07e-23	5.76e-25	17.8197	46.4305	1.9	SHMT2	serine hydroxymethyltransferase 2
218051_s_at	2.09e-23	5.84e-25	17.8149	46.4173	1.85	NT5DC2	5'-nucleotidase domain containing 2
204658_at	2.23e-23	6.26e-25	17.7893	46.3471	1.7	TRA2A	transformer 2 alpha homolog
217211_at	2.24e-23	6.3e-25	17.787	46.3407	2.29	ACTBP9	actin, beta pseudogene 9
205812_s_at	2.38e-23	6.72e-25	17.763	46.2749	1.81	TMED9	transmembrane p24 trafficking protein 9
201037_at	2.61e-23	7.42e-25	17.7267	46.1752	3	PFKP	phosphofructokinase, platelet
201091_s_at	2.72e-23	7.77e-25	17.7098	46.1289	1.9	CBX3	chromobox 3
200886_s_at	2.93e-23	8.39e-25	17.6819	46.0521	1.56	PGAM1	phosphoglycerate mutase 1
212995_x_at	3.09e-23	8.86e-25	17.662	45.9974	1.57	MZT2A///MZT2B///PHGDH	mitotic spindle organizing protein 2A///mitotic spindle organizing protein 2B///phosphoglycerate dehydrogenase
202620_s_at	3.21e-23	9.25e-25	17.6459	45.9532	3.13	PLOD2	procollagen-lysine,2-oxoglutarate 5-dioxygenase 2
213646_x_at	3.34e-23	9.65e-25	17.6305	45.9107	1.75	TUBA1B	tubulin alpha 1b
207543_s_at	4.17e-23	1.21e-24	17.547	45.6799	2.02	P4HA1	prolyl 4-hydroxylase subunit alpha 1
200832_s_at	4.43e-23	1.29e-24	17.5237	45.6155	3.54	SCD	stearoyl-CoA desaturase
221749_at	4.49e-23	1.32e-24	17.5176	45.5984	1.58	YTHDF3	YTH N6-methyladenosine RNA binding protein 3
216073_at	4.65e-23	1.37e-24	17.5041	45.5611	2.05	ANKRD34C	ankyrin repeat domain 34C
202202_s_at	4.87e-23	1.45e-24	17.4829	45.5024	3.17	LAMA4	laminin subunit alpha 4
215237_at	5.1e-23	1.52e-24	17.4659	45.4552	1.7	DOCK9	dedicator of cytokinesis 9
217881_s_at	5.71e-23	1.71e-24	17.422	45.3331	1.73	CDC27	cell division cycle 27
205376_at	5.72e-23	1.72e-24	17.4207	45.3295	2.86	INPP4B	inositol polyphosphate-4-phosphatase type II B
216323_x_at	6.04e-23	1.82e-24	17.3995	45.2705	1.92	TUBA3D///TUBA3C	tubulin alpha 3d///tubulin alpha 3c
213503_x_at	7.84e-23	2.42e-24	17.2972	44.9852	1.77	ANXA2	annexin A2
202897_at	8.6e-23	2.67e-24	17.2619	44.8865	2.04	SIRPA	signal regulatory protein alpha
204528_s_at	9e-23	2.81e-24	17.2436	44.8355	1.87	NAP1L1	nucleosome assembly protein 1 like 1
204279_at	9.81e-23	3.08e-24	17.2108	44.7434	2.86	PSMB9	proteasome subunit beta 9
215829_at	1.01e-22	3.17e-24	17.1997	44.7123	1.55	SHANK2	SH3 and multiple ankyrin repeat domains 2
214378_at	1.01e-22	3.2e-24	17.1973	44.7055	1.89	TFPI	tissue factor pathway inhibitor
208690_s_at	1.08e-22	3.44e-24	17.1713	44.6326	1.78	PDLIM1	PDZ and LIM domain 1
201105_at	1.23e-22	3.91e-24	17.1253	44.5032	2.93	LGALS1	galectin 1
203707_at	1.32e-22	4.21e-24	17.0987	44.4284	1.67	LINC00921///ZNF263	long intergenic non-protein coding RNA 921///zinc finger protein 263
210527_x_at	1.34e-22	4.31e-24	17.0903	44.4048	1.97	TUBA3D///TUBA3C	tubulin alpha 3d///tubulin alpha 3c
204122_at	1.47e-22	4.72e-24	17.0578	44.3131	2.89	TYROBP	TYRO protein tyrosine kinase binding protein
207989_at	1.47e-22	4.75e-24	17.0557	44.3073	1.83	OPRM1	opioid receptor mu 1
209183_s_at	1.5e-22	4.83e-24	17.0492	44.2888	2.83	C10orf10	chromosome 10 open reading frame 10
216860_s_at	1.53e-22	4.93e-24	17.042	44.2684	1.56	GDF11	growth differentiation factor 11
201666_at	1.62e-22	5.23e-24	17.0209	44.209	2.83	TIMP1	TIMP metallopeptidase inhibitor 1
205289_at	1.66e-22	5.39e-24	17.01	44.1782	2.11	BMP2	bone morphogenetic protein 2
217767_at	1.73e-22	5.63e-24	16.9948	44.135	3.73	C3	complement component 3
201548_s_at	1.81e-22	5.89e-24	16.9786	44.0893	1.66	KDM5B	lysine demethylase 5B
214982_at	1.85e-22	6.05e-24	16.9692	44.0627	2.09	LOC101929240///SNRNP200	U5 small nuclear ribonucleoprotein 200 kDa helicase pseudogene///small nuclear ribonucleoprotein U5 subunit 200
206771_at	1.86e-22	6.1e-24	16.9665	44.055	1.67	UPK3A	uroplakin 3A
218213_s_at	1.95e-22	6.41e-24	16.9489	44.005	1.51	TMEM258	transmembrane protein 258
208641_s_at	2.04e-22	6.73e-24	16.9313	43.9551	1.54	RAC1	ras-related C3 botulinum toxin substrate 1 (rho family, small GTP binding protein Rac1)
205744_at	2.63e-22	8.83e-24	16.8353	43.6824	1.63	DOC2A	double C2 domain alpha
211990_at	2.7e-22	9.08e-24	16.8251	43.6536	2.05	HLA-DPA1	major histocompatibility complex, class II, DP alpha 1
215046_at	3.17e-22	1.08e-23	16.7656	43.4838	1.69	KANSL1L	KAT8 regulatory NSL complex subunit 1 like
208752_x_at	3.22e-22	1.1e-23	16.7583	43.4629	1.53	NAP1L1	nucleosome assembly protein 1 like 1
214853_s_at	3.22e-22	1.1e-23	16.7577	43.4612	1.98	SHC1	SHC adaptor protein 1
203409_at	3.31e-22	1.13e-23	16.7467	43.4298	1.79	DDB2	damage specific DNA binding protein 2
221441_at	3.59e-22	1.23e-23	16.717	43.3449	1.75	GSC2	goosecoid homeobox 2
209900_s_at	3.63e-22	1.25e-23	16.7115	43.3291	3.44	SLC16A1	solute carrier family 16 member 1
212078_s_at	3.65e-22	1.26e-23	16.7096	43.3237	1.53	KMT2A	lysine methyltransferase 2A
215091_s_at	3.85e-22	1.33e-23	16.6894	43.266	1.7	GTF3A	general transcription factor IIIA
205628_at	4.4e-22	1.55e-23	16.6365	43.1141	1.83	PRIM2	primase (DNA) subunit 2
209191_at	4.88e-22	1.73e-23	16.5986	43.0053	2.06	TUBB6	tubulin beta 6 class V
215452_x_at	5.13e-22	1.83e-23	16.579	42.949	1.68	SUMO4	small ubiquitin-like modifier 4
212382_at	5.15e-22	1.84e-23	16.5771	42.9436	2.28	TCF4	transcription factor 4
203415_at	5.37e-22	1.93e-23	16.5609	42.8971	2.24	PDCD6	programmed cell death 6
31845_at	6.57e-22	2.39e-23	16.486	42.6809	1.54	ELF4	E74 like ETS transcription factor 4
217678_at	6.61e-22	2.41e-23	16.483	42.6723	2.12	SLC7A11	solute carrier family 7 member 11
209166_s_at	7.27e-22	2.68e-23	16.4459	42.565	1.75	MAN2B1	mannosidase alpha class 2B member 1
202705_at	7.32e-22	2.7e-23	16.4429	42.5565	1.73	CCNB2	cyclin B2
201954_at	7.53e-22	2.79e-23	16.4319	42.5248	1.7	ARPC1B	actin related protein 2/3 complex subunit 1B
210427_x_at	7.53e-22	2.79e-23	16.4316	42.5237	1.74	ANXA2	annexin A2
218153_at	8.46e-22	3.15e-23	16.3889	42.4	1.61	CARS2	cysteinyl-tRNA synthetase 2, mitochondrial (putative)
213010_at	8.98e-22	3.36e-23	16.3669	42.3362	1.79	PRKCDBP	protein kinase C delta binding protein
213386_at	9.26e-22	3.47e-23	16.3554	42.303	1.74	TMEM246	transmembrane protein 246
214177_s_at	9.37e-22	3.52e-23	16.3507	42.2894	1.61	PBXIP1	PBX homeobox interacting protein 1
218130_at	1.01e-21	3.8e-23	16.3244	42.2129	1.59	C17orf62	chromosome 17 open reading frame 62
203423_at	1.1e-21	4.17e-23	16.2921	42.1189	1.63	RBP1	retinol binding protein 1
207583_at	1.14e-21	4.34e-23	16.2786	42.0797	1.82	ABCD2	ATP binding cassette subfamily D member 2
218627_at	1.27e-21	4.87e-23	16.2385	41.9629	1.53	DRAM1	DNA damage regulated autophagy modulator 1
201590_x_at	1.39e-21	5.35e-23	16.2062	41.8687	1.76	ANXA2	annexin A2
210465_s_at	1.5e-21	5.81e-23	16.1777	41.7854	2.42	SNAPC3	small nuclear RNA activating complex polypeptide 3
220336_s_at	1.57e-21	6.11e-23	16.1603	41.7344	1.85	GP6	glycoprotein VI platelet
200644_at	1.63e-21	6.34e-23	16.1473	41.6964	1.74	MARCKSL1	MARCKS like 1
221567_at	2.31e-21	9.19e-23	16.02	41.323	2.49	NOL3	nucleolar protein 3
215309_at	2.72e-21	1.09e-22	15.9606	41.148	3.52	ZNF674	zinc finger protein 674
203890_s_at	2.72e-21	1.1e-22	15.96	41.146	2.34	MIR637///DAPK3	microRNA 637///death associated protein kinase 3
204319_s_at	2.73e-21	1.1e-22	15.9584	41.1415	1.91	RGS10	regulator of G-protein signaling 10
217995_at	2.77e-21	1.12e-22	15.9537	41.1275	1.53	SQRDL	sulfide quinone reductase-like (yeast)
203505_at	2.82e-21	1.14e-22	15.9474	41.109	1.52	ABCA1	ATP binding cassette subfamily A member 1
201313_at	3.04e-21	1.23e-22	15.9199	41.0278	3.14	ENO2	enolase 2
208142_at	3.04e-21	1.23e-22	15.9192	41.0257	1.51	EDDM3A	epididymal protein 3A
200632_s_at	3.37e-21	1.38e-22	15.882	40.9158	1.72	NDRG1	N-myc downstream regulated 1
204751_x_at	3.37e-21	1.38e-22	15.8814	40.914	1.97	DSC2	desmocollin 2
202510_s_at	3.68e-21	1.52e-22	15.8493	40.8189	1.6	TNFAIP2	TNF alpha induced protein 2
210439_at	3.8e-21	1.57e-22	15.838	40.7855	1.72	ICOS	inducible T-cell costimulator
201160_s_at	4.18e-21	1.73e-22	15.8053	40.6883	1.73	YBX3	Y-box binding protein 3
213749_at	4.65e-21	1.93e-22	15.7665	40.5733	1.79	MASP1	mannan binding lectin serine peptidase 1
208636_at	4.93e-21	2.06e-22	15.7448	40.5086	2.07	ACTN1	actinin alpha 1
216442_x_at	5.05e-21	2.12e-22	15.7356	40.4814	2.66	FN1	fibronectin 1
216740_at	5.1e-21	2.15e-22	15.7314	40.4689	2.05
202619_s_at	5.25e-21	2.21e-22	15.7208	40.4374	3.16	PLOD2	procollagen-lysine,2-oxoglutarate 5-dioxygenase 2
213011_s_at	5.31e-21	2.24e-22	15.7168	40.4254	1.53	TPI1	triosephosphate isomerase 1
215019_x_at	5.55e-21	2.35e-22	15.7002	40.376	1.66	ZNF528	zinc finger protein 528
211476_at	5.67e-21	2.41e-22	16.0029	40.4077	4.56	MYOZ2	myozenin 2
217983_s_at	6.19e-21	2.63e-22	15.6622	40.2625	3.69	RNASET2	ribonuclease T2
219325_s_at	6.9e-21	2.97e-22	15.6214	40.1406	1.72	ELAC1	elaC ribonuclease Z 1
204900_x_at	7.06e-21	3.05e-22	15.6132	40.1161	2.61	SAP30	Sin3A associated protein 30
207196_s_at	7.37e-21	3.19e-22	15.598	40.0707	1.71	TNIP1	TNFAIP3 interacting protein 1
213458_at	7.5e-21	3.25e-22	15.5918	40.0521	1.65	FAM149B1	family with sequence similarity 149 member B1
212464_s_at	7.5e-21	3.25e-22	15.5915	40.0511	2.7	FN1	fibronectin 1
202625_at	8e-21	3.49e-22	15.5671	39.9781	1.92	LYN	LYN proto-oncogene, Src family tyrosine kinase
212314_at	8e-21	3.5e-22	15.5661	39.9753	2.24	SEL1L3	SEL1L family member 3
202185_at	8.16e-21	3.58e-22	15.5589	39.9536	1.6	PLOD3	procollagen-lysine,2-oxoglutarate 5-dioxygenase 3
200762_at	8.34e-21	3.66e-22	15.5512	39.9305	1.61	DPYSL2	dihydropyrimidinase like 2
210953_at	8.49e-21	3.73e-22	15.5449	39.9115	1.87	TSC22D2	TSC22 domain family member 2
212658_at	8.98e-21	3.98e-22	15.5237	39.848	2.11	LHFPL2	lipoma HMGIC fusion partner-like 2
207750_at	9.27e-21	4.11e-22	15.5129	39.8155	3.17
204115_at	1.08e-20	4.84e-22	15.4577	39.6496	1.73	GNG11	G protein subunit gamma 11
210495_x_at	1.17e-20	5.29e-22	15.4278	39.5596	2.64	FN1	fibronectin 1
201649_at	1.19e-20	5.4e-22	15.4211	39.5394	1.8	UBE2L6	ubiquitin conjugating enzyme E2 L6
221009_s_at	1.19e-20	5.4e-22	15.4211	39.5393	3.68	ANGPTL4	angiopoietin like 4
217764_s_at	1.22e-20	5.53e-22	15.4133	39.5159	1.71	RAB31	RAB31, member RAS oncogene family
202153_s_at	1.23e-20	5.57e-22	15.4108	39.5084	1.53	NUP62	nucleoporin 62
211459_at	1.32e-20	6.03e-22	15.3841	39.4276	1.82
211340_s_at	1.55e-20	7.09e-22	15.3302	39.265	2.35	MIR6756///MCAM	microRNA 6756///melanoma cell adhesion molecule
45297_at	1.61e-20	7.39e-22	15.3167	39.224	1.96	EHD2	EH domain containing 2
201746_at	1.68e-20	7.74e-22	15.3012	39.177	1.69	TP53	tumor protein p53
211719_x_at	1.74e-20	8.02e-22	15.2892	39.1408	2.68	FN1	fibronectin 1
221098_x_at	1.76e-20	8.16e-22	15.2837	39.1242	4.18	UTP14A	UTP14A small subunit processome component
200872_at	1.92e-20	8.92e-22	15.254	39.0339	1.63	S100A10	S100 calcium binding protein A10
215313_x_at	1.99e-20	9.32e-22	15.2394	38.9896	1.57	HLA-A	major histocompatibility complex, class I, A
218149_s_at	2.6e-20	1.22e-21	15.1495	38.7164	2.57	ZNF395	zinc finger protein 395
207775_at	2.68e-20	1.26e-21	15.1393	38.6851	2.15	MGC4859	uncharacterized LOC79150
214452_at	2.87e-20	1.36e-21	15.1141	38.6083	1.83	BCAT1	branched chain amino acid transaminase 1
217206_at	3.22e-20	1.53e-21	15.0749	38.4884	1.96
204416_x_at	3.23e-20	1.54e-21	15.0731	38.4831	2.86	APOC1	apolipoprotein C1
202307_s_at	3.55e-20	1.7e-21	15.0401	38.3822	2.47	TAP1	transporter 1, ATP binding cassette subfamily B member
201140_s_at	3.67e-20	1.77e-21	15.0281	38.3452	2.06	RAB5C	RAB5C, member RAS oncogene family
205469_s_at	3.8e-20	1.83e-21	15.017	38.3114	1.52	IRF5	interferon regulatory factor 5
201389_at	4.05e-20	1.95e-21	14.9953	38.2449	1.56	ITGA5	integrin subunit alpha 5
202345_s_at	4.1e-20	1.98e-21	14.9901	38.229	3.02	FABP5	fatty acid binding protein 5
219332_at	4.31e-20	2.1e-21	14.9718	38.1726	2.04	MICALL2	MICAL like 2
201250_s_at	4.68e-20	2.29e-21	14.9428	38.0837	1.94	SLC2A1	solute carrier family 2 member 1
211714_x_at	4.69e-20	2.3e-21	14.9414	38.0793	1.74	TUBB	tubulin beta class I
209115_at	4.7e-20	2.31e-21	14.9402	38.0757	1.69	UBA3	ubiquitin like modifier activating enzyme 3
217632_at	4.89e-20	2.4e-21	14.9271	38.0354	1.71	GNL3L	G protein nucleolar 3 like
203530_s_at	5.46e-20	2.7e-21	14.8885	37.9167	1.67	STX4	syntaxin 4
221676_s_at	5.47e-20	2.71e-21	14.8877	37.9141	1.66	CORO1C	coronin 1C
213857_s_at	5.51e-20	2.74e-21	14.8843	37.9038	1.74	CD47	CD47 molecule
221253_s_at	5.55e-20	2.76e-21	14.8822	37.8971	1.52	BLOC1S5-TXNDC5///TXNDC5	BLOC1S5-TXNDC5 readthrough (NMD candidate)///thioredoxin domain containing 5
219888_at	5.71e-20	2.85e-21	14.8716	37.8647	2.04	SPAG4	sperm associated antigen 4
209251_x_at	5.84e-20	2.92e-21	14.8637	37.8402	1.68	TUBA1C	tubulin alpha 1c
207369_at	5.96e-20	2.98e-21	14.8564	37.8176	1.6	BRS3	bombesin receptor subtype 3
221827_at	8.82e-20	4.5e-21	14.7224	37.4034	2.2	RBCK1	RANBP2-type and C3HC4-type zinc finger containing 1
221870_at	9.52e-20	4.9e-21	14.695	37.3185	1.74	EHD2	EH domain containing 2
213733_at	9.96e-20	5.15e-21	14.6785	37.2671	1.58	MYO1F	myosin IF
200900_s_at	1.02e-19	5.3e-21	14.6695	37.2392	2.01	M6PR	mannose-6-phosphate receptor, cation dependent
213786_at	1.04e-19	5.43e-21	14.6617	37.215	2.26	TAX1BP1	Tax1 binding protein 1
211063_s_at	1.08e-19	5.6e-21	14.6513	37.1826	1.51	NCK1	NCK adaptor protein 1
203756_at	1.09e-19	5.68e-21	14.6467	37.1683	1.61	ARHGEF17	Rho guanine nucleotide exchange factor 17
206425_s_at	1.11e-19	5.82e-21	14.6391	37.1448	1.67	TRPC3	transient receptor potential cation channel subfamily C member 3
209439_s_at	1.15e-19	6.03e-21	14.6275	37.1087	1.55	PHKA2	phosphorylase kinase regulatory subunit alpha 2
202887_s_at	1.23e-19	6.47e-21	14.605	37.0384	2.77	DDIT4	DNA damage inducible transcript 4
209118_s_at	1.26e-19	6.63e-21	14.5971	37.014	2.21	TUBA1A	tubulin alpha 1a
219890_at	1.26e-19	6.65e-21	14.5962	37.011	1.85	CLEC5A	C-type lectin domain family 5 member A
219520_s_at	1.33e-19	7.03e-21	14.5781	36.9546	1.8	WWC3	WWC family member 3
216237_s_at	1.45e-19	7.76e-21	14.5463	36.8554	1.55	MCM5	minichromosome maintenance complex component 5
209250_at	1.46e-19	7.78e-21	14.5455	36.8529	2.14	DEGS1	delta 4-desaturase, sphingolipid 1
218542_at	1.53e-19	8.18e-21	14.5293	36.8024	1.84	CEP55	centrosomal protein 55
204422_s_at	1.57e-19	8.41e-21	14.5202	36.7741	1.87	FGF2	fibroblast growth factor 2
218232_at	1.68e-19	9.07e-21	14.4959	36.698	2.58	C1QA	complement C1q A chain
202157_s_at	1.87e-19	1.01e-20	14.4597	36.5845	1.86	CELF2	CUGBP, Elav-like family member 2
201338_x_at	1.87e-19	1.02e-20	14.459	36.5825	1.58	GTF3A	general transcription factor IIIA
209496_at	2e-19	1.09e-20	14.4356	36.5089	1.86	RARRES2	retinoic acid receptor responder 2
215081_at	2.09e-19	1.14e-20	14.421	36.4631	2.06	KIAA1024	KIAA1024
203132_at	2.09e-19	1.15e-20	14.4202	36.4607	2.18	RB1	RB transcriptional corepressor 1
221923_s_at	2.14e-19	1.18e-20	14.4126	36.4368	1.6	NPM1	nucleophosmin
215529_x_at	2.25e-19	1.24e-20	14.3962	36.3855	2.23	DIP2A	disco interacting protein 2 homolog A
204735_at	2.58e-19	1.43e-20	14.3493	36.238	1.53	PDE4A	phosphodiesterase 4A
206939_at	2.69e-19	1.49e-20	14.3355	36.1945	1.62	DCC	DCC netrin 1 receptor
212971_at	2.88e-19	1.61e-20	14.3123	36.1215	1.68	CARS	cysteinyl-tRNA synthetase
218507_at	2.89e-19	1.62e-20	14.3104	36.1155	3.49	HILPDA	hypoxia inducible lipid droplet associated
204820_s_at	2.9e-19	1.62e-20	14.3091	36.1113	2.17	BTN3A2///BTN3A3	butyrophilin subfamily 3 member A2///butyrophilin subfamily 3 member A3
221667_s_at	3.02e-19	1.7e-20	14.2949	36.0665	2.14	HSPB8	heat shock protein family B (small) member 8
211750_x_at	3.05e-19	1.72e-20	14.2905	36.0525	1.65	TUBA1C	tubulin alpha 1c
203104_at	3.41e-19	1.93e-20	14.2538	35.9368	1.74	CSF1R	colony stimulating factor 1 receptor
219762_s_at	4.03e-19	2.32e-20	14.1954	35.7522	2.01	RPL36	ribosomal protein L36
217762_s_at	4.04e-19	2.33e-20	14.1942	35.7482	2.03	RAB31	RAB31, member RAS oncogene family
201128_s_at	4.67e-19	2.72e-20	14.1446	35.5911	1.72	ACLY	ATP citrate lyase
211026_s_at	4.81e-19	2.81e-20	14.1342	35.5581	1.61	MGLL	monoglyceride lipase
221203_s_at	4.84e-19	2.83e-20	14.1319	35.5509	1.69	YEATS2	YEATS domain containing 2
221123_x_at	5.42e-19	3.19e-20	14.0943	35.4312	2.84	FBXO16///ZNF395	F-box protein 16///zinc finger protein 395
200650_s_at	5.68e-19	3.38e-20	14.0763	35.3739	2.13	LDHA	lactate dehydrogenase A
210538_s_at	5.72e-19	3.4e-20	14.0737	35.3659	3.17	BIRC3	baculoviral IAP repeat containing 3
217992_s_at	6.53e-19	3.93e-20	14.0282	35.2209	1.57	EFHD2	EF-hand domain family member D2
203940_s_at	6.73e-19	4.06e-20	14.0182	35.1891	1.81	VASH1	vasohibin 1
201743_at	6.74e-19	4.06e-20	14.0175	35.1868	2.27	CD14	CD14 molecule
213572_s_at	7.15e-19	4.33e-20	13.9979	35.1241	1.52	SERPINB1	serpin family B member 1
213349_at	7.26e-19	4.4e-20	13.9922	35.106	1.93	TMCC1	transmembrane and coiled-coil domain family 1
205255_x_at	7.65e-19	4.65e-20	13.9748	35.0503	1.87	TCF7	transcription factor 7 (T-cell specific, HMG-box)
203066_at	7.69e-19	4.68e-20	13.973	35.0447	1.97	CHST15	carbohydrate (N-acetylgalactosamine 4-sulfate 6-O) sulfotransferase 15
200652_at	8.83e-19	5.44e-20	13.9258	34.8937	1.53	SSR2	signal sequence receptor subunit 2
204175_at	9.53e-19	5.88e-20	13.9011	34.8146	1.97	ZNF593	zinc finger protein 593
213351_s_at	9.88e-19	6.12e-20	13.8886	34.7746	2.16	TMCC1	transmembrane and coiled-coil domain family 1
208091_s_at	1.02e-18	6.34e-20	13.8776	34.7394	1.59	VOPP1	vesicular, overexpressed in cancer, prosurvival protein 1
202659_at	1.08e-18	6.74e-20	13.8585	34.678	1.89	PSMB10	proteasome subunit beta 10
208829_at	1.08e-18	6.75e-20	13.8581	34.6767	2.13	TAPBP	TAP binding protein (tapasin)
201849_at	1.1e-18	6.86e-20	13.8528	34.6598	1.96	BNIP3	BCL2 interacting protein 3
209277_at	1.1e-18	6.87e-20	13.8525	34.6586	4.05	TFPI2	tissue factor pathway inhibitor 2
201004_at	1.37e-18	8.71e-20	13.7778	34.4188	1.68	SSR4	signal sequence receptor subunit 4
202015_x_at	1.67e-18	1.08e-19	13.7098	34.1993	3.29	METAP2	methionyl aminopeptidase 2
219232_s_at	1.91e-18	1.25e-19	13.6649	34.0542	2.77	EGLN3	egl-9 family hypoxia inducible factor 3
204220_at	1.93e-18	1.26e-19	13.6621	34.0454	1.74	GMFG	glia maturation factor gamma
205485_at	1.93e-18	1.27e-19	13.6609	34.0412	1.71	RYR1	ryanodine receptor 1
217949_s_at	1.99e-18	1.31e-19	13.6506	34.0081	1.76	VKORC1	vitamin K epoxide reductase complex subunit 1
208789_at	2.09e-18	1.38e-19	13.6349	33.9573	1.6	PTRF	polymerase I and transcript release factor
217691_x_at	2.18e-18	1.45e-19	13.6196	33.9077	2.15	MIR6787///SLC16A3	microRNA 6787///solute carrier family 16 member 3
201137_s_at	2.18e-18	1.45e-19	13.619	33.9059	2.17	HLA-DPB1	major histocompatibility complex, class II, DP beta 1
200697_at	2.24e-18	1.49e-19	13.61	33.8767	1.61	HK1	hexokinase 1
217292_at	2.42e-18	1.62e-19	13.5843	33.7931	2.21	MTMR7	myotubularin related protein 7
209087_x_at	2.46e-18	1.65e-19	13.5797	33.7784	1.91	MCAM	melanoma cell adhesion molecule
215001_s_at	2.59e-18	1.74e-19	13.5623	33.7217	1.61	GLUL	glutamate-ammonia ligase
221401_at	2.68e-18	1.8e-19	13.5513	33.686	1.6	CACNG5	calcium voltage-gated channel auxiliary subunit gamma 5
219619_at	2.75e-18	1.85e-19	13.5429	33.6587	3.78	DIRAS2	DIRAS family GTPase 2
202649_x_at	2.89e-18	1.95e-19	13.5267	33.6062	1.99	RPS19	ribosomal protein S19
217908_s_at	2.97e-18	2.01e-19	13.5173	33.5757	1.76	DCAF6	DDB1 and CUL4 associated factor 6
215411_s_at	3.54e-18	2.44e-19	13.4577	33.3815	1.54	TRAF3IP2	TRAF3 interacting protein 2
220647_s_at	3.54e-18	2.44e-19	13.4573	33.3801	1.73	COA4	cytochrome c oxidase assembly factor 4 homolog
214078_at	4.45e-18	3.13e-19	13.3806	33.1298	2.36	PAK3	p21 (RAC1) activated kinase 3
212579_at	4.65e-18	3.29e-19	13.3655	33.0803	1.75	SMCHD1	structural maintenance of chromosomes flexible hinge domain containing 1
221729_at	5.68e-18	4.04e-19	13.3022	32.873	2.08	COL5A2	collagen type V alpha 2 chain
209448_at	6.38e-18	4.57e-19	13.2647	32.7497	2	HTATIP2	HIV-1 Tat interactive protein 2
214718_at	6.45e-18	4.63e-19	13.261	32.7375	1.57	GATAD1	GATA zinc finger domain containing 1
207571_x_at	6.98e-18	5.02e-19	13.2356	32.6542	1.68	THEMIS2	thymocyte selection associated family member 2
212998_x_at	7.93e-18	5.75e-19	13.1944	32.5185	2.88	LOC101060835///HLA-DQB1	HLA class II histocompatibility antigen, DQ beta 1 chain-like///major histocompatibility complex, class II, DQ beta 1
203065_s_at	9.31e-18	6.83e-19	13.1417	32.3447	2.32	CAV1	caveolin 1
207943_x_at	9.45e-18	6.95e-19	13.1366	32.3278	2.02	PLAGL1	PLAG1 like zinc finger 1
209732_at	9.97e-18	7.37e-19	13.1187	32.2688	1.98	CLEC2B	C-type lectin domain family 2 member B
205483_s_at	1.05e-17	7.78e-19	13.1021	32.2137	2.36	ISG15	ISG15 ubiquitin-like modifier
209122_at	1.12e-17	8.36e-19	13.0802	32.1413	2.51	PLIN2	perilipin 2
201720_s_at	1.15e-17	8.6e-19	13.0715	32.1127	2.19	LAPTM5	lysosomal protein transmembrane 5
201939_at	1.15e-17	8.63e-19	13.0706	32.1096	2.41	PLK2	polo like kinase 2
214456_x_at	1.18e-17	8.92e-19	13.0605	32.0762	2.87	SAA2///SAA1	serum amyloid A2///serum amyloid A1
217840_at	1.19e-17	8.99e-19	13.0581	32.0682	1.74	DDX41	DEAD-box helicase 41
203510_at	1.22e-17	9.23e-19	13.05	32.0415	2.05	MET	MET proto-oncogene, receptor tyrosine kinase
222270_at	1.25e-17	9.49e-19	13.0417	32.0141	2.61	PPP4R3B	protein phosphatase 4 regulatory subunit 3B
209683_at	1.33e-17	1.01e-18	13.0222	31.9493	1.73	FAM49A	family with sequence similarity 49 member A
207953_at	1.36e-17	1.04e-18	13.0145	31.9236	1.62
218145_at	1.54e-17	1.19e-18	12.972	31.7827	2.51	TRIB3	tribbles pseudokinase 3
201506_at	1.57e-17	1.21e-18	12.9674	31.7674	3.44	TGFBI	transforming growth factor beta induced
210330_at	1.58e-17	1.23e-18	12.9636	31.7548	3.02	SGCD	sarcoglycan delta
221698_s_at	1.66e-17	1.29e-18	12.9486	31.7048	1.74	CLEC7A	C-type lectin domain family 7 member A
202332_at	1.7e-17	1.32e-18	12.9411	31.6797	1.61	LOC400927-CSNK1E///CSNK1E	LOC400927-CSNK1E readthrough///casein kinase 1 epsilon
204767_s_at	1.73e-17	1.35e-18	12.9349	31.6592	1.57	FEN1	flap structure-specific endonuclease 1
208296_x_at	1.81e-17	1.42e-18	12.9201	31.6101	1.75	TNFAIP8	TNF alpha induced protein 8
204007_at	1.94e-17	1.53e-18	12.8972	31.5337	2.04	FCGR3B	Fc fragment of IgG receptor IIIb
213414_s_at	2.01e-17	1.59e-18	12.8849	31.4927	2.01	RPS19	ribosomal protein S19
202644_s_at	2.04e-17	1.62e-18	12.8795	31.4745	1.8	TNFAIP3	TNF alpha induced protein 3
221539_at	2.07e-17	1.64e-18	12.8753	31.4607	1.85	EIF4EBP1	eukaryotic translation initiation factor 4E binding protein 1
219117_s_at	2.09e-17	1.67e-18	12.8709	31.446	2.11	FKBP11	FK506 binding protein 11
217763_s_at	2.1e-17	1.68e-18	12.8695	31.4413	1.87	RAB31	RAB31, member RAS oncogene family
211787_s_at	2.18e-17	1.74e-18	12.8576	31.4018	1.75	LOC101928634///SENP3-EIF4A1///SNORD10///SNORA48///SNORA67///EIF4A1	uncharacterized LOC101928634///SENP3-EIF4A1 readthrough (NMD candidate)///small nucleolar RNA, C/D box 10///small nucleolar RNA, H/ACA box 48///small nucleolar RNA, H/ACA box 67///eukaryotic translation initiation factor 4A1
214770_at	2.24e-17	1.81e-18	12.847	31.3662	2.13	MSR1	macrophage scavenger receptor 1
202934_at	2.28e-17	1.84e-18	12.841	31.3463	2.75	HK2	hexokinase 2
212639_x_at	2.31e-17	1.87e-18	12.8366	31.3314	1.88	TUBA1B	tubulin alpha 1b
215671_at	2.36e-17	1.91e-18	12.83	31.3094	1.78	PDE4B	phosphodiesterase 4B
208960_s_at	2.37e-17	1.92e-18	12.8291	31.3065	2.35	KLF6	Kruppel like factor 6
213603_s_at	2.46e-17	1.99e-18	12.8173	31.2669	1.6	RAC2	ras-related C3 botulinum toxin substrate 2 (rho family, small GTP binding protein Rac2)
211284_s_at	2.56e-17	2.09e-18	12.8032	31.2199	1.51	GRN	granulin
202686_s_at	2.7e-17	2.22e-18	12.7853	31.16	1.52	AXL	AXL receptor tyrosine kinase
208981_at	2.93e-17	2.41e-18	12.76	31.0753	1.58	PECAM1	platelet and endothelial cell adhesion molecule 1
219959_at	2.95e-17	2.43e-18	12.7573	31.0662	1.67	MOCOS	molybdenum cofactor sulfurase
205649_s_at	3.57e-17	2.97e-18	12.6972	30.8645	3.16	FGA	fibrinogen alpha chain
211964_at	3.85e-17	3.23e-18	12.6722	30.7806	1.9	COL4A2	collagen type IV alpha 2 chain
208436_s_at	4.25e-17	3.59e-18	12.6404	30.6737	2.08	IRF7	interferon regulatory factor 7
218999_at	4.51e-17	3.84e-18	12.6205	30.6065	1.67	TMEM140	transmembrane protein 140
215223_s_at	4.63e-17	3.95e-18	12.6121	30.5785	2.5	LOC100129518///SOD2	uncharacterized LOC100129518///superoxide dismutase 2, mitochondrial
208659_at	4.76e-17	4.06e-18	12.604	30.5511	1.66	CLIC1	chloride intracellular channel 1
201426_s_at	5.25e-17	4.51e-18	12.5722	30.444	2.53	VIM	vimentin
200651_at	5.54e-17	4.78e-18	12.5551	30.3862	1.54	SNORD96A///SNORD95///RACK1	small nucleolar RNA, C/D box 96A///small nucleolar RNA, C/D box 95///receptor for activated C kinase 1
204396_s_at	5.62e-17	4.85e-18	12.5504	30.3701	1.65	GRK5	G protein-coupled receptor kinase 5
210073_at	5.66e-17	4.89e-18	12.5484	30.3635	1.72	ST8SIA1	ST8 alpha-N-acetyl-neuraminide alpha-2,8-sialyltransferase 1
209008_x_at	5.71e-17	4.94e-18	12.5454	30.3532	2.09	KRT8	keratin 8
210260_s_at	6.02e-17	5.24e-18	12.5273	30.2922	1.98	TNFAIP8	TNF alpha induced protein 8
202690_s_at	6.28e-17	5.51e-18	12.5129	30.2434	1.53	SNRPD1	small nuclear ribonucleoprotein D1 polypeptide
214797_s_at	6.71e-17	5.91e-18	12.4919	30.1725	2.32	CDK18	cyclin dependent kinase 18
221058_s_at	6.83e-17	6.04e-18	12.4855	30.1508	1.54	CKLF	chemokine like factor
209702_at	7.2e-17	6.38e-18	12.4692	30.0957	1.64	FTO	fat mass and obesity associated
212977_at	8.05e-17	7.16e-18	12.4347	29.9786	2.62	ACKR3	atypical chemokine receptor 3
202796_at	8.19e-17	7.3e-18	12.4292	29.9599	1.73	SYNPO	synaptopodin
210512_s_at	8.47e-17	7.56e-18	12.4187	29.9245	1.99	VEGFA	vascular endothelial growth factor A
201302_at	8.63e-17	7.71e-18	12.413	29.9049	1.94	ANXA4	annexin A4
202651_at	1.08e-16	9.79e-18	12.342	29.6635	1.56	LPGAT1	lysophosphatidylglycerol acyltransferase 1
209215_at	1.12e-16	1.02e-17	12.3294	29.6208	1.54	MFSD10	major facilitator superfamily domain containing 10
212992_at	1.32e-16	1.21e-17	12.279	29.4489	2.33	AHNAK2	AHNAK nucleoprotein 2
214459_x_at	1.38e-16	1.27e-17	12.2661	29.4049	1.57	HLA-C	major histocompatibility complex, class I, C
208711_s_at	1.47e-16	1.36e-17	12.2446	29.3316	2.31	CCND1	cyclin D1
212552_at	1.49e-16	1.38e-17	12.2408	29.3187	1.88	HPCAL1	hippocalcin like 1
201422_at	1.55e-16	1.45e-17	12.226	29.268	1.95	IFI30///PIK3R2	IFI30, lysosomal thiol reductase///phosphoinositide-3-kinase regulatory subunit 2
213566_at	1.65e-16	1.54e-17	12.2086	29.2084	1.76	RNASE6	ribonuclease A family member k6
203236_s_at	1.66e-16	1.55e-17	12.2066	29.2015	1.53	LGALS9	galectin 9
209040_s_at	1.67e-16	1.56e-17	12.2037	29.1918	2.19	PSMB8	proteasome subunit beta 8
217967_s_at	1.69e-16	1.59e-17	12.1985	29.1738	1.8	FAM129A	family with sequence similarity 129 member A
213125_at	1.73e-16	1.62e-17	12.1928	29.1543	1.93	OLFML2B	olfactomedin like 2B
201530_x_at	1.73e-16	1.63e-17	12.1926	29.1537	1.7	LOC101928634///SENP3-EIF4A1///SNORD10///SNORA48///SNORA67///EIF4A1	uncharacterized LOC101928634///SENP3-EIF4A1 readthrough (NMD candidate)///small nucleolar RNA, C/D box 10///small nucleolar RNA, H/ACA box 48///small nucleolar RNA, H/ACA box 67///eukaryotic translation initiation factor 4A1
208982_at	1.79e-16	1.7e-17	12.1798	29.1099	2.15	PECAM1	platelet and endothelial cell adhesion molecule 1
202878_s_at	1.98e-16	1.89e-17	12.1479	29.0008	1.87	CD93	CD93 molecule
218404_at	2.01e-16	1.92e-17	12.1432	28.9847	1.85	SNX10	sorting nexin 10
204912_at	2.03e-16	1.93e-17	12.1414	28.9784	1.67	IL10RA	interleukin 10 receptor subunit alpha
213062_at	2.11e-16	2.02e-17	12.1286	28.9344	1.51	NTAN1	N-terminal asparagine amidase
200905_x_at	2.17e-16	2.08e-17	12.1195	28.9031	1.86	HLA-E	major histocompatibility complex, class I, E
202411_at	2.44e-16	2.37e-17	12.0812	28.7717	2.38	IFI27	interferon alpha inducible protein 27
218223_s_at	2.46e-16	2.4e-17	12.0786	28.7627	1.71	PLEKHO1	pleckstrin homology domain containing O1
202998_s_at	2.51e-16	2.46e-17	12.0715	28.7383	2.76	LOXL2	lysyl oxidase like 2
212268_at	2.51e-16	2.46e-17	12.0714	28.7381	1.55	SERPINB1	serpin family B member 1
200771_at	2.68e-16	2.64e-17	12.0507	28.6667	1.54	LAMC1	laminin subunit gamma 1
219402_s_at	3.1e-16	3.08e-17	12.0053	28.5103	1.64	DERL1	derlin 1
222329_x_at	3.17e-16	3.16e-17	11.998	28.4854	1.93
204446_s_at	3.18e-16	3.17e-17	11.997	28.4818	2.81	ALOX5	arachidonate 5-lipoxygenase
202589_at	3.41e-16	3.41e-17	11.9754	28.4075	1.99	TYMS	thymidylate synthetase
216834_at	3.45e-16	3.46e-17	11.9712	28.393	3.23	RGS1	regulator of G-protein signaling 1
209026_x_at	3.51e-16	3.52e-17	11.9663	28.3758	1.79	TUBB	tubulin beta class I
214181_x_at	3.64e-16	3.65e-17	11.9554	28.3383	1.52	LST1	leukocyte specific transcript 1
212110_at	3.8e-16	3.84e-17	11.9411	28.289	2.09	SLC39A14	solute carrier family 39 member 14
202912_at	3.99e-16	4.03e-17	11.9266	28.2389	2.29	ADM	adrenomedullin
213553_x_at	4.15e-16	4.21e-17	11.9141	28.1957	2.1	APOC1	apolipoprotein C1
216841_s_at	4.21e-16	4.27e-17	11.9097	28.1803	2.58	LOC100129518///SOD2	uncharacterized LOC100129518///superoxide dismutase 2, mitochondrial
203753_at	4.26e-16	4.34e-17	11.9055	28.1658	1.6	TCF4	transcription factor 4
201859_at	4.7e-16	4.82e-17	11.8747	28.0593	1.53	SRGN	serglycin
202112_at	4.86e-16	5e-17	11.8642	28.0229	2.38	VWF	von Willebrand factor
200738_s_at	5.1e-16	5.25e-17	11.8498	27.9731	1.61	PGK1	phosphoglycerate kinase 1
213891_s_at	5.22e-16	5.38e-17	11.8426	27.948	1.82	TCF4	transcription factor 4
205656_at	5.4e-16	5.58e-17	11.8321	27.9117	1.62	PCDH17	protocadherin 17
216524_x_at	5.55e-16	5.77e-17	11.8227	27.879	1.71
219947_at	5.87e-16	6.11e-17	11.8057	27.8202	1.79	CLEC4A	C-type lectin domain family 4 member A
216974_at	6.16e-16	6.44e-17	11.7907	27.7679	1.75	KITLG	KIT ligand
206584_at	6.26e-16	6.56e-17	11.7853	27.7493	2.55	LY96	lymphocyte antigen 96
204619_s_at	6.35e-16	6.65e-17	11.7812	27.7351	2.58	VCAN	versican
218411_s_at	6.38e-16	6.69e-17	11.7794	27.7289	1.92	MBIP	MAP3K12 binding inhibitory protein 1
222342_at	6.38e-16	6.7e-17	11.7792	27.728	1.75
218634_at	6.65e-16	7.02e-17	11.7657	27.6812	1.58	PHLDA3	pleckstrin homology like domain family A member 3
211656_x_at	7.08e-16	7.51e-17	11.746	27.6125	2.41	LOC101060835///HLA-DQB1	HLA class II histocompatibility antigen, DQ beta 1 chain-like///major histocompatibility complex, class II, DQ beta 1
201063_at	7.19e-16	7.64e-17	11.7413	27.5962	1.97	RCN1	reticulocalbin 1
204158_s_at	7.28e-16	7.74e-17	11.7372	27.582	1.62	TCIRG1	T-cell immune regulator 1, ATPase H+ transporting V0 subunit a3
221120_at	7.37e-16	7.85e-17	11.7334	27.5688	1.53
201587_s_at	7.71e-16	8.23e-17	11.7196	27.5206	1.57	IRAK1	interleukin 1 receptor associated kinase 1
59625_at	8.55e-16	9.19e-17	11.6878	27.41	1.56	NOL3	nucleolar protein 3
211980_at	9.19e-16	9.93e-17	11.6655	27.3321	1.9	COL4A1	collagen type IV alpha 1 chain
208998_at	9.59e-16	1.04e-16	11.6512	27.2824	1.72	UCP2	uncoupling protein 2
217456_x_at	1.03e-15	1.12e-16	11.6308	27.2109	1.91	HLA-E	major histocompatibility complex, class I, E
211530_x_at	1.05e-15	1.15e-16	11.6237	27.1861	2.05	HLA-G	major histocompatibility complex, class I, G
220146_at	1.05e-15	1.15e-16	11.6227	27.1827	2.09	TLR7	toll like receptor 7
214438_at	1.08e-15	1.18e-16	11.6148	27.1551	1.53	HLX	H2.0 like homeobox
202404_s_at	1.09e-15	1.2e-16	11.6114	27.1433	2.98	COL1A2	collagen type I alpha 2 chain
212918_at	1.13e-15	1.25e-16	11.5989	27.0994	1.54	RECQL	RecQ like helicase
40687_at	1.2e-15	1.33e-16	11.5807	27.0359	1.91	GJA4	gap junction protein alpha 4
212387_at	1.34e-15	1.5e-16	11.5472	26.9184	1.99	TCF4	transcription factor 4
201042_at	1.42e-15	1.59e-16	11.5304	26.8595	2.33	TGM2	transglutaminase 2
219134_at	1.53e-15	1.71e-16	11.5083	26.7822	1.86	ADGRL4	adhesion G protein-coupled receptor L4
221296_at	1.53e-15	1.72e-16	11.508	26.7813	1.55	TECTA	tectorin alpha
221875_x_at	1.59e-15	1.79e-16	11.4962	26.7399	1.98	HLA-F	major histocompatibility complex, class I, F
212613_at	1.59e-15	1.8e-16	11.4944	26.7335	1.72	BTN3A2	butyrophilin subfamily 3 member A2
203675_at	1.68e-15	1.9e-16	11.479	26.6793	1.79	NUCB2	nucleobindin 2
205462_s_at	1.79e-15	2.04e-16	11.4583	26.6064	1.92	HPCAL1	hippocalcin like 1
208949_s_at	1.99e-15	2.29e-16	11.4257	26.4921	1.77	LGALS3	lectin, galactoside binding soluble 3
221935_s_at	2.14e-15	2.48e-16	11.403	26.4122	1.87	EOGT	EGF domain specific O-linked N-acetylglucosamine transferase
217739_s_at	2.55e-15	2.98e-16	11.3497	26.2243	1.6	NAMPT	nicotinamide phosphoribosyltransferase
204821_at	2.56e-15	3e-16	11.3484	26.2195	1.64	BTN3A3	butyrophilin subfamily 3 member A3
212667_at	2.56e-15	3e-16	11.3482	26.2187	1.52	SPARC	secreted protein acidic and cysteine rich
201847_at	2.72e-15	3.19e-16	11.3305	26.1564	1.84	LIPA	lipase A, lysosomal acid type
207414_s_at	2.75e-15	3.23e-16	11.3271	26.1443	2.42	LOC100507472///PCSK6	uncharacterized LOC100507472///proprotein convertase subtilisin/kexin type 6
209230_s_at	2.78e-15	3.27e-16	11.3233	26.131	2.31	NUPR1	nuclear protein 1, transcriptional regulator
205258_at	2.84e-15	3.36e-16	11.3161	26.1054	2.86	INHBB	inhibin beta B subunit
204198_s_at	3.14e-15	3.74e-16	11.2853	25.9966	1.75	RUNX3	runt related transcription factor 3
214578_s_at	3.16e-15	3.76e-16	11.284	25.9922	1.53	ROCK1	Rho associated coiled-coil containing protein kinase 1
201667_at	3.25e-15	3.87e-16	11.2755	25.9619	2.23	GJA1	gap junction protein alpha 1
216041_x_at	3.3e-15	3.95e-16	11.27	25.9427	1.55	GRN	granulin
218181_s_at	3.34e-15	3.99e-16	11.2669	25.9318	1.71	MAP4K4	mitogen-activated protein kinase kinase kinase kinase 4
AFFX-HUMISGF3A/M97935_5_at	3.39e-15	4.06e-16	11.2618	25.9136	1.62	STAT1	signal transducer and activator of transcription 1
209140_x_at	3.51e-15	4.22e-16	11.2513	25.8766	1.78	HLA-B	major histocompatibility complex, class I, B
204806_x_at	3.64e-15	4.39e-16	11.2396	25.8352	2	HLA-F	major histocompatibility complex, class I, F
221258_s_at	3.86e-15	4.68e-16	11.2219	25.7725	1.54	KIF18A	kinesin family member 18A
212501_at	4.43e-15	5.45e-16	11.1786	25.6186	1.96	CEBPB	CCAAT/enhancer binding protein beta
213424_at	4.53e-15	5.58e-16	11.172	25.5954	1.75	KIAA0895	KIAA0895
219815_at	4.73e-15	5.84e-16	11.1588	25.5486	1.54	GAL3ST4	galactose-3-O-sulfotransferase 4
201189_s_at	4.74e-15	5.86e-16	11.1579	25.5455	1.71	ITPR3	inositol 1,4,5-trisphosphate receptor type 3
219386_s_at	5.06e-15	6.3e-16	11.1373	25.472	2.2	SLAMF8	SLAM family member 8
211654_x_at	5.61e-15	7.04e-16	11.1059	25.3604	2.45	HLA-DQB1	major histocompatibility complex, class II, DQ beta 1
214511_x_at	5.63e-15	7.06e-16	11.1051	25.3577	1.61	FCGR1B	Fc fragment of IgG receptor Ib
201601_x_at	5.69e-15	7.15e-16	11.1016	25.3453	1.56	IFITM2///IFITM1	interferon induced transmembrane protein 2///interferon induced transmembrane protein 1
217478_s_at	6.83e-15	8.7e-16	11.0461	25.1475	2.11	HLA-DMA	major histocompatibility complex, class II, DM alpha
201669_s_at	6.91e-15	8.81e-16	11.0426	25.1352	1.85	MARCKS	myristoylated alanine rich protein kinase C substrate
204205_at	7.2e-15	9.22e-16	11.03	25.0902	1.52	APOBEC3G	apolipoprotein B mRNA editing enzyme catalytic subunit 3G
200764_s_at	7.55e-15	9.69e-16	11.0159	25.04	2.21	CTNNA1	catenin alpha 1
217436_x_at	7.89e-15	1.02e-15	11.0023	24.9912	1.94	HLA-J	major histocompatibility complex, class I, J (pseudogene)
201721_s_at	8.53e-15	1.11e-15	10.9784	24.9059	2.53	LAPTM5	lysosomal protein transmembrane 5
211671_s_at	9.13e-15	1.19e-15	10.9583	24.8341	1.69	NR3C1	nuclear receptor subfamily 3 group C member 1
212386_at	9.26e-15	1.21e-15	10.9543	24.8197	2.08	TCF4	transcription factor 4
212646_at	9.34e-15	1.22e-15	10.9516	24.8103	1.61	RFTN1	raftlin, lipid raft linker 1
203140_at	9.86e-15	1.29e-15	10.9347	24.7499	1.69	BCL6	B-cell CLL/lymphoma 6
218888_s_at	1.06e-14	1.4e-15	10.9123	24.6694	2.31	NETO2	neuropilin and tolloid like 2
212637_s_at	1.07e-14	1.41e-15	10.9093	24.6589	1.89	WWP1	WW domain containing E3 ubiquitin protein ligase 1
205016_at	1.16e-14	1.54e-15	10.8861	24.5757	1.85	TGFA	transforming growth factor alpha
221478_at	1.29e-14	1.73e-15	10.8523	24.4547	1.58	BNIP3L	BCL2 interacting protein 3 like
201670_s_at	1.32e-14	1.78e-15	10.8455	24.4303	2	MARCKS	myristoylated alanine rich protein kinase C substrate
202856_s_at	1.38e-14	1.86e-15	10.8328	24.3847	3.1	MIR6787///SLC16A3	microRNA 6787///solute carrier family 16 member 3
202375_at	1.38e-14	1.86e-15	10.8324	24.3833	1.81	SEC24D	SEC24 homolog D, COPII coat complex component
202503_s_at	1.39e-14	1.87e-15	10.8306	24.3768	1.62	KIAA0101	KIAA0101
200999_s_at	1.42e-14	1.93e-15	10.8224	24.3471	1.84	CKAP4	cytoskeleton associated protein 4
204774_at	1.45e-14	1.97e-15	10.8162	24.3249	1.92	EVI2A	ecotropic viral integration site 2A
201714_at	1.6e-14	2.19e-15	10.7872	24.2209	1.51	TUBG1	tubulin gamma 1
218084_x_at	1.84e-14	2.54e-15	10.7459	24.0722	1.51	FXYD5	FXYD domain containing ion transport regulator 5
200634_at	2.03e-14	2.83e-15	10.7151	23.9613	1.57	PFN1	profilin 1
221731_x_at	2.07e-14	2.89e-15	10.7094	23.9408	3.14	VCAN	versican
200921_s_at	2.13e-14	2.97e-15	10.7016	23.9127	1.52	BTG1	BTG anti-proliferation factor 1
205670_at	2.17e-14	3.04e-15	10.695	23.889	2.01	GAL3ST1	galactose-3-O-sulfotransferase 1
207714_s_at	2.77e-14	3.95e-15	10.6225	23.627	1.77	SERPINH1	serpin family H member 1
218723_s_at	2.86e-14	4.08e-15	10.6133	23.594	1.88	RGCC	regulator of cell cycle
210212_x_at	3.16e-14	4.53e-15	10.5839	23.4877	1.65	CMC4	C-X9-C motif containing 4
204670_x_at	3.25e-14	4.68e-15	10.5751	23.4558	1.96	LOC100996809///HLA-DRB4///HLA-DRB1	HLA class II histocompatibility antigen, DRB1-10 beta chain-like///major histocompatibility complex, class II, DR beta 4///major histocompatibility complex, class II, DR beta 1
200003_s_at	3.26e-14	4.7e-15	10.574	23.4518	1.65	MIR6805///RPL28	microRNA 6805///ribosomal protein L28
203741_s_at	3.44e-14	4.97e-15	10.5584	23.3952	1.85	ADCY7	adenylate cyclase 7
221479_s_at	3.69e-14	5.36e-15	10.5375	23.3196	1.58	BNIP3L	BCL2 interacting protein 3 like
217838_s_at	3.76e-14	5.47e-15	10.5319	23.2992	1.67	EVL	Enah/Vasp-like
202310_s_at	3.87e-14	5.64e-15	10.5231	23.2675	2.74	COL1A1	collagen type I alpha 1 chain
211991_s_at	4.95e-14	7.35e-15	10.45	23.0022	2.24	HLA-DPA1	major histocompatibility complex, class II, DP alpha 1
221267_s_at	5.48e-14	8.2e-15	10.4198	22.8923	1.55	ABHD17A	abhydrolase domain containing 17A
216862_s_at	5.54e-14	8.3e-15	10.4165	22.8805	1.6	CMC4	C-X9-C motif containing 4
204620_s_at	5.63e-14	8.46e-15	10.4112	22.8611	2.97	VCAN	versican
210926_at	6.37e-14	9.64e-15	10.3749	22.729	2.15	POTEKP	POTE ankyrin domain family member K, pseudogene
202531_at	6.59e-14	1e-14	10.365	22.6931	1.73	IRF1	interferon regulatory factor 1
210869_s_at	6.89e-14	1.05e-14	10.352	22.6456	2.19	MIR6756///MCAM	microRNA 6756///melanoma cell adhesion molecule
200920_s_at	6.92e-14	1.05e-14	10.351	22.6418	1.94	BTG1	BTG anti-proliferation factor 1
216634_at	7.56e-14	1.15e-14	10.3253	22.5484	1.85	PLCH1	phospholipase C eta 1
200953_s_at	7.61e-14	1.16e-14	10.3236	22.542	1.63	CCND2	cyclin D2
201474_s_at	7.61e-14	1.16e-14	10.3234	22.5415	2.16	ITGA3	integrin subunit alpha 3
202284_s_at	8.08e-14	1.24e-14	10.3056	22.4763	1.69	CDKN1A	cyclin dependent kinase inhibitor 1A
202664_at	8.64e-14	1.33e-14	10.2863	22.4059	1.75	WIPF1	WAS/WASL interacting protein family member 1
211981_at	8.83e-14	1.36e-14	10.2798	22.3824	2.09	COL4A1	collagen type IV alpha 1 chain
202207_at	8.84e-14	1.36e-14	10.2794	22.3807	2.41	ARL4C	ADP ribosylation factor like GTPase 4C
209846_s_at	9.1e-14	1.4e-14	10.2713	22.3513	2.5	BTN3A2	butyrophilin subfamily 3 member A2
218983_at	9.61e-14	1.49e-14	10.2549	22.2912	1.59	C1RL	complement C1r subcomponent like
203964_at	1.02e-13	1.6e-14	10.2361	22.2227	1.51	NMI	N-myc and STAT interactor
201185_at	1.05e-13	1.65e-14	10.2278	22.1922	1.74	HTRA1	HtrA serine peptidase 1
212588_at	1.08e-13	1.69e-14	10.2212	22.168	2.13	PTPRC	protein tyrosine phosphatase, receptor type C
202208_s_at	1.11e-13	1.74e-14	10.2128	22.1373	1.89	ARL4C	ADP ribosylation factor like GTPase 4C
221653_x_at	1.12e-13	1.76e-14	10.2098	22.1265	1.62	APOL2	apolipoprotein L2
219700_at	1.16e-13	1.82e-14	10.1994	22.0882	1.53	PLXDC1	plexin domain containing 1
212887_at	1.25e-13	1.98e-14	10.1774	22.0076	1.62	SEC23A	Sec23 homolog A, coat complex II component
209598_at	1.29e-13	2.05e-14	10.1673	21.9708	2.01	PNMA2	paraneoplastic Ma antigen 2
212354_at	1.33e-13	2.12e-14	10.1584	21.9382	1.85	SULF1	sulfatase 1
201798_s_at	1.4e-13	2.24e-14	10.1427	21.8805	1.71	MYOF	myoferlin
205199_at	1.4e-13	2.26e-14	10.1412	21.8751	2.09	CA9	carbonic anhydrase 9
201431_s_at	1.45e-13	2.33e-14	10.1321	21.8418	1.7	DPYSL3	dihydropyrimidinase like 3
203213_at	1.47e-13	2.37e-14	10.1271	21.8233	1.62	CDK1	cyclin dependent kinase 1
212171_x_at	1.74e-13	2.84e-14	10.0781	21.6436	2.14	VEGFA	vascular endothelial growth factor A
216589_at	1.8e-13	2.93e-14	10.0694	21.6115	1.7
218484_at	1.9e-13	3.12e-14	10.0526	21.5498	3.71	NDUFA4L2	NDUFA4, mitochondrial complex associated like 2
207604_s_at	1.98e-13	3.25e-14	10.0408	21.5066	1.98	SLC4A7	solute carrier family 4 member 7
204655_at	2.07e-13	3.42e-14	10.0276	21.4581	2.36	CCL5	C-C motif chemokine ligand 5
209083_at	2.07e-13	3.42e-14	10.0276	21.4578	1.54	CORO1A	coronin 1A
208712_at	2.19e-13	3.63e-14	10.0109	21.3964	2.24	CCND1	cyclin D1
212063_at	2.21e-13	3.67e-14	10.0081	21.386	1.87	CD44	CD44 molecule (Indian blood group)
210445_at	2.29e-13	3.81e-14	9.99783	21.3483	2.06	FABP6	fatty acid binding protein 6
209581_at	2.47e-13	4.13e-14	9.97582	21.2673	1.52	PLA2G16	phospholipase A2 group XVI
203645_s_at	2.61e-13	4.38e-14	9.96008	21.2093	2.49	CD163	CD163 molecule
219410_at	2.61e-13	4.39e-14	9.95911	21.2057	3.16	TMEM45A	transmembrane protein 45A
200827_at	2.66e-13	4.47e-14	9.95398	21.1868	1.75	PLOD1	procollagen-lysine,2-oxoglutarate 5-dioxygenase 1
204232_at	3.03e-13	5.14e-14	9.91649	21.0486	1.97	FCER1G	Fc fragment of IgE receptor Ig
218898_at	3.19e-13	5.43e-14	9.90126	20.9924	1.62	FAM57A	family with sequence similarity 57 member A
206026_s_at	3.42e-13	5.85e-14	9.88121	20.9184	2.62	TNFAIP6	TNF alpha induced protein 6
201251_at	3.58e-13	6.16e-14	9.86677	20.865	1.8	PKM	pyruvate kinase, muscle
211529_x_at	3.72e-13	6.43e-14	9.85545	20.8232	2.04	HLA-G	major histocompatibility complex, class I, G
209546_s_at	4.59e-13	8.06e-14	9.79407	20.5962	1.99	APOL1	apolipoprotein L1
217979_at	4.91e-13	8.67e-14	9.77424	20.5227	1.77	TSPAN13	tetraspanin 13
201136_at	5.15e-13	9.14e-14	9.75979	20.4692	1.52	PLP2	proteolipid protein 2
200700_s_at	5.68e-13	1.02e-13	9.73117	20.3631	1.65	KDELR2	KDEL endoplasmic reticulum protein retention receptor 2
218237_s_at	6.12e-13	1.1e-13	9.71003	20.2847	1.84	SLC38A1	solute carrier family 38 member 1
203238_s_at	6.33e-13	1.14e-13	9.6999	20.2472	1.62	NOTCH3	notch 3
203665_at	6.64e-13	1.2e-13	9.68635	20.1969	1.78	HMOX1	heme oxygenase 1
203323_at	7.5e-13	1.37e-13	9.65071	20.0645	1.98	CAV2	caveolin 2
208747_s_at	8.32e-13	1.53e-13	9.62079	19.9533	2.02	C1S	complement component 1, s subcomponent
211161_s_at	9.65e-13	1.8e-13	9.57723	19.7912	2.21	COL3A1	collagen type III alpha 1 chain
32128_at	9.89e-13	1.84e-13	9.57035	19.7656	2.27	CCL18	C-C motif chemokine ligand 18
209823_x_at	1.14e-12	2.14e-13	9.52935	19.6129	2.28	LOC101060835///HLA-DQB1	HLA class II histocompatibility antigen, DQ beta 1 chain-like///major histocompatibility complex, class II, DQ beta 1
201761_at	1.41e-12	2.7e-13	9.46728	19.3814	1.75	MTHFD2	methylenetetrahydrofolate dehydrogenase (NADP+ dependent) 2, methenyltetrahydrofolate cyclohydrolase
204284_at	1.41e-12	2.7e-13	9.46713	19.3809	1.79	PPP1R3C	protein phosphatase 1 regulatory subunit 3C
203828_s_at	1.44e-12	2.77e-13	9.46085	19.3574	2.43	IL32	interleukin 32
205488_at	1.51e-12	2.9e-13	9.44859	19.3116	2.07	GZMA	granzyme A
217788_s_at	1.63e-12	3.16e-13	9.4253	19.2247	1.8	GALNT2	polypeptide N-acetylgalactosaminyltransferase 2
205730_s_at	2.32e-12	4.59e-13	9.32489	18.8491	1.76	ABLIM3	actin binding LIM protein family member 3
202311_s_at	2.35e-12	4.65e-13	9.32155	18.8366	2.69	COL1A1	collagen type I alpha 1 chain
208729_x_at	2.63e-12	5.24e-13	9.28948	18.7164	2.18	HLA-B	major histocompatibility complex, class I, B
201301_s_at	2.65e-12	5.29e-13	9.287	18.7071	2.03	ANXA4	annexin A4
213479_at	2.67e-12	5.33e-13	9.28513	18.7001	4.13	NPTX2	neuronal pentraxin 2
213975_s_at	2.69e-12	5.37e-13	9.28267	18.6909	2.45	LYZ	lysozyme
212235_at	2.7e-12	5.39e-13	9.28207	18.6887	1.89	PLXND1	plexin D1
215049_x_at	2.78e-12	5.58e-13	9.2728	18.6539	2.32	CD163	CD163 molecule
217299_s_at	2.9e-12	5.83e-13	9.2611	18.6101	1.65	NBN	nibrin
201848_s_at	3.06e-12	6.18e-13	9.24531	18.5508	1.72	BNIP3	BCL2 interacting protein 3
208161_s_at	3.29e-12	6.68e-13	9.22434	18.4721	1.83	ABCC3	ATP binding cassette subfamily C member 3
204787_at	3.37e-12	6.87e-13	9.21706	18.4448	1.62	VSIG4	V-set and immunoglobulin domain containing 4
212489_at	4e-12	8.27e-13	9.16751	18.2587	2.09	COL5A1	collagen type V alpha 1 chain
212473_s_at	4.46e-12	9.28e-13	9.13683	18.1434	1.52	MICAL2	microtubule associated monooxygenase, calponin and LIM domain containing 2
211799_x_at	4.48e-12	9.32e-13	9.13556	18.1386	1.89	HLA-C	major histocompatibility complex, class I, C
205532_s_at	4.49e-12	9.34e-13	9.13501	18.1365	1.7	CDH6	cadherin 6
202403_s_at	4.53e-12	9.45e-13	9.1319	18.1248	2.13	COL1A2	collagen type I alpha 2 chain
203439_s_at	4.83e-12	1.01e-12	9.11335	18.0551	1.83	STC2	stanniocalcin 2
206271_at	5.02e-12	1.05e-12	9.10315	18.0167	1.88	TLR3	toll like receptor 3
205204_at	5.13e-12	1.08e-12	9.09663	17.9922	1.9	NMB	neuromedin B
218638_s_at	5.19e-12	1.09e-12	9.09325	17.9794	2.33	LOC100130872///SPON2	uncharacterized LOC100130872///spondin 2
209555_s_at	5.44e-12	1.15e-12	9.07976	17.9286	2.08	CD36	CD36 molecule
200737_at	5.66e-12	1.2e-12	9.06829	17.8855	1.82	PGK1	phosphoglycerate kinase 1
202270_at	5.67e-12	1.2e-12	9.06773	17.8834	1.97	GBP1	guanylate binding protein 1
208682_s_at	5.76e-12	1.22e-12	9.06343	17.8672	1.52	MAGED2	MAGE family member D2
200887_s_at	5.81e-12	1.23e-12	9.06116	17.8586	1.52	STAT1	signal transducer and activator of transcription 1
207808_s_at	5.95e-12	1.26e-12	9.05417	17.8323	1.89	PROS1	protein S (alpha)
201508_at	6.2e-12	1.32e-12	9.04228	17.7875	1.62	IGFBP4	insulin like growth factor binding protein 4
206025_s_at	6.44e-12	1.38e-12	9.03151	17.7469	2.78	TNFAIP6	TNF alpha induced protein 6
210498_at	7.37e-12	1.59e-12	8.9928	17.601	3.32	CLTC	clathrin heavy chain
222139_at	9.3e-12	2.04e-12	8.9268	17.3519	1.58	ERV3-2	endogenous retrovirus group 3 member 2
203729_at	9.43e-12	2.07e-12	8.92286	17.337	2.11	EMP3	epithelial membrane protein 3
1405_i_at	9.44e-12	2.07e-12	8.92255	17.3359	1.79	CCL5	C-C motif chemokine ligand 5
200736_s_at	1.14e-11	2.56e-12	8.86721	17.1268	1.68	GPX1	glutathione peroxidase 1
204490_s_at	1.15e-11	2.57e-12	8.86609	17.1226	1.56	CD44	CD44 molecule (Indian blood group)
205572_at	1.22e-11	2.74e-12	8.84915	17.0585	1.58	ANGPT2	angiopoietin 2
202820_at	1.51e-11	3.43e-12	8.78945	16.8326	2.17	AHR	aryl hydrocarbon receptor
204150_at	1.63e-11	3.74e-12	8.76629	16.7449	1.76	STAB1	stabilin 1
221477_s_at	1.67e-11	3.83e-12	8.76011	16.7215	1.7	LOC100129518///SOD2	uncharacterized LOC100129518///superoxide dismutase 2, mitochondrial
201141_at	1.74e-11	4e-12	8.74847	16.6775	2.13	GPNMB	glycoprotein nmb
211528_x_at	2.49e-11	5.9e-12	8.64592	16.2886	1.86	HLA-G	major histocompatibility complex, class I, G
213624_at	2.52e-11	5.98e-12	8.64244	16.2754	1.67	SMPDL3A	sphingomyelin phosphodiesterase acid like 3A
201201_at	3e-11	7.2e-12	8.59332	16.089	1.65	CSTB	cystatin B
204858_s_at	3.25e-11	7.84e-12	8.57068	16.0029	1.74	TYMP	thymidine phosphorylase
208965_s_at	3.69e-11	8.98e-12	8.53495	15.8672	1.57	IFI16	interferon gamma inducible protein 16
214803_at	4.05e-11	9.92e-12	8.50878	15.7677	1.82	CDH6	cadherin 6
202023_at	4.06e-11	9.94e-12	8.50831	15.7659	1.59	EFNA1	ephrin A1
201117_s_at	4.52e-11	1.12e-11	8.47783	15.65	1.84	CPE	carboxypeptidase E
201983_s_at	4.55e-11	1.13e-11	8.47561	15.6415	2.18	EGFR	epidermal growth factor receptor
213915_at	4.61e-11	1.14e-11	8.47216	15.6284	1.58	NKG7	natural killer cell granule protein 7
218559_s_at	4.9e-11	1.22e-11	8.45441	15.5608	1.6	MAFB	MAF bZIP transcription factor B
201596_x_at	5.55e-11	1.39e-11	8.4192	15.4268	1.51	KRT18	keratin 18
202786_at	6.62e-11	1.68e-11	8.36974	15.2385	1.7	STK39	serine/threonine kinase 39
217362_x_at	7.59e-11	1.94e-11	8.33192	15.0943	2	HLA-DRB6	major histocompatibility complex, class II, DR beta 6 (pseudogene)
212012_at	7.79e-11	2e-11	8.32413	15.0647	1.65	PXDN	peroxidasin
209071_s_at	7.8e-11	2e-11	8.32388	15.0637	1.9	RGS5	regulator of G-protein signaling 5
204567_s_at	7.95e-11	2.05e-11	8.31807	15.0416	1.52	ABCG1	ATP binding cassette subfamily G member 1
215446_s_at	8.11e-11	2.09e-11	8.31268	15.021	2.61	LOX	lysyl oxidase
206836_at	8.6e-11	2.23e-11	8.296	14.9574	2.87	SLC6A3	solute carrier family 6 member 3
214752_x_at	9.73e-11	2.54e-11	8.26121	14.8247	1.51	FLNA	filamin A
212671_s_at	9.85e-11	2.58e-11	8.25799	14.8125	2.56	LOC100509457///HLA-DQA2///HLA-DQA1	HLA class II histocompatibility antigen, DQ alpha 1 chain-like///major histocompatibility complex, class II, DQ alpha 2///major histocompatibility complex, class II, DQ alpha 1
211911_x_at	1.02e-10	2.66e-11	8.24937	14.7796	2.06	HLA-B	major histocompatibility complex, class I, B
208306_x_at	1.02e-10	2.67e-11	8.24886	14.7776	1.98	HLA-DRB1	major histocompatibility complex, class II, DR beta 1
203438_at	1.12e-10	2.97e-11	8.22022	14.6683	2.03	STC2	stanniocalcin 2
209373_at	1.14e-10	3.02e-11	8.21593	14.652	1.67	MALL	mal, T-cell differentiation protein like
204070_at	1.32e-10	3.52e-11	8.17602	14.4996	1.8	RARRES3	retinoic acid receptor responder 3
202766_s_at	1.42e-10	3.83e-11	8.15381	14.4148	1.63	FBN1	fibrillin 1
216576_x_at	1.48e-10	3.99e-11	8.1434	14.375	2.79	IGK///IGKC	immunoglobulin kappa locus///immunoglobulin kappa constant
211148_s_at	1.53e-10	4.15e-11	8.13287	14.3348	1.54	ANGPT2	angiopoietin 2
200660_at	1.66e-10	4.52e-11	8.11074	14.2503	1.69	S100A11	S100 calcium binding protein A11
203857_s_at	1.8e-10	4.93e-11	8.08768	14.1622	1.62	MIR7110///PDIA5	microRNA 7110///protein disulfide isomerase family A member 5
209859_at	1.82e-10	4.97e-11	8.08588	14.1553	1.63	TRIM9	tripartite motif containing 9
206015_s_at	1.95e-10	5.36e-11	8.06598	14.0792	1.56	FOXJ3	forkhead box J3
208637_x_at	1.97e-10	5.43e-11	8.06262	14.0664	1.58	ACTN1	actinin alpha 1
212067_s_at	1.99e-10	5.47e-11	8.06077	14.0593	1.96	C1R	complement C1r subcomponent
202357_s_at	2.03e-10	5.6e-11	8.05453	14.0355	1.83	CFB	complement factor B
202145_at	2.13e-10	5.89e-11	8.04106	13.984	1.78	LY6E	lymphocyte antigen 6 complex, locus E
209312_x_at	2.53e-10	7.1e-11	7.99239	13.7979	2.06	LOC101060835///LOC100996809///HLA-DRB5///HLA-DRB4///HLA-DRB1///HLA-DQB1	HLA class II histocompatibility antigen, DQ beta 1 chain-like///HLA class II histocompatibility antigen, DRB1-10 beta chain-like///major histocompatibility complex, class II, DR beta 5///major histocompatibility complex, class II, DR beta 4///major histocompatibility complex, class II, DR beta 1///major histocompatibility complex, class II, DQ beta 1
209201_x_at	2.55e-10	7.15e-11	7.9903	13.7899	1.72	CXCR4	C-X-C motif chemokine receptor 4
202381_at	2.78e-10	7.82e-11	7.96708	13.7011	1.55	ADAM9	ADAM metallopeptidase domain 9
201438_at	2.79e-10	7.86e-11	7.96564	13.6956	2.06	COL6A3	collagen type VI alpha 3 chain
220330_s_at	2.86e-10	8.06e-11	7.95925	13.6712	1.61	SAMSN1	SAM domain, SH3 domain and nuclear localization signals 1
200795_at	2.87e-10	8.1e-11	7.958	13.6664	1.55	SPARCL1	SPARC like 1
222288_at	3.14e-10	8.91e-11	7.93288	13.5703	1.83
215076_s_at	3.23e-10	9.18e-11	7.92519	13.5408	2.21	COL3A1	collagen type III alpha 1 chain
202733_at	3.68e-10	1.05e-10	7.88913	13.4029	1.52	LOC101927705///P4HA2	uncharacterized LOC101927705///prolyl 4-hydroxylase subunit alpha 2
202234_s_at	4.28e-10	1.24e-10	7.84691	13.2413	1.59	SLC16A1	solute carrier family 16 member 1
204058_at	4.85e-10	1.42e-10	7.81178	13.1067	1.66	ME1	malic enzyme 1
201272_at	4.92e-10	1.44e-10	7.80773	13.0913	1.78	AKR1B1	aldo-keto reductase family 1 member B
201012_at	5.11e-10	1.5e-10	7.79672	13.0491	1.67	ANXA1	annexin A1
202219_at	5.12e-10	1.5e-10	7.7961	13.0467	1.92	SLC6A8	solute carrier family 6 member 8
211919_s_at	5.23e-10	1.54e-10	7.79009	13.0237	1.72	CXCR4	C-X-C motif chemokine receptor 4
214437_s_at	6.06e-10	1.81e-10	7.74842	12.8641	1.67	SHMT2	serine hydroxymethyltransferase 2
212143_s_at	6.55e-10	1.96e-10	7.72675	12.7812	2.69	IGFBP3	insulin like growth factor binding protein 3
210915_x_at	7.55e-10	2.29e-10	7.68698	12.6288	1.91	TRBC1	T cell receptor beta constant 1
214428_x_at	7.86e-10	2.39e-10	7.67544	12.5846	1.71	C4B_2///C4B///C4A	complement component 4B (Chido blood group), copy 2///complement component 4B (Chido blood group)///complement component 4A (Rodgers blood group)
209160_at	8.25e-10	2.52e-10	7.66198	12.5331	1.57	AKR1C3	aldo-keto reductase family 1, member C3
204083_s_at	8.57e-10	2.62e-10	7.6516	12.4933	1.71	TPM2	tropomyosin 2 (beta)
205073_at	1.07e-09	3.3e-10	7.59112	12.2616	2.06	CYP2J2	cytochrome P450 family 2 subfamily J member 2
205893_at	1.12e-09	3.48e-10	7.57762	12.2099	1.68	NLGN1	neuroligin 1
203592_s_at	1.17e-09	3.66e-10	7.56441	12.1593	1.52	FSTL3	follistatin like 3
211160_x_at	1.18e-09	3.67e-10	7.56325	12.1549	1.86	ACTN1	actinin alpha 1
218545_at	1.19e-09	3.7e-10	7.56101	12.1463	1.72	CCDC91	coiled-coil domain containing 91
200869_at	1.22e-09	3.8e-10	7.55429	12.1205	1.84	SNORA68///RPL18A	small nucleolar RNA, H/ACA box 68///ribosomal protein L18a
201852_x_at	1.26e-09	3.96e-10	7.5437	12.08	2.19	COL3A1	collagen type III alpha 1 chain
210809_s_at	1.28e-09	4.02e-10	7.5397	12.0646	2.06	POSTN	periostin
217871_s_at	1.6e-09	5.11e-10	7.47713	11.8249	1.74	MIF	macrophage migration inhibitory factor (glycosylation-inhibiting factor)
211527_x_at	1.66e-09	5.31e-10	7.46735	11.7875	2.28	VEGFA	vascular endothelial growth factor A
200904_at	2.15e-09	7.01e-10	7.3947	11.5091	1.66	HLA-E	major histocompatibility complex, class I, E
202499_s_at	3.11e-09	1.04e-09	7.29274	11.1187	1.91	SLC2A3	solute carrier family 2 member 3
219584_at	3.23e-09	1.08e-09	7.28181	11.0768	1.6	PLA1A	phospholipase A1 member A
218618_s_at	3.55e-09	1.2e-09	7.25499	10.9741	1.92	LOC101928615///FNDC3B	uncharacterized LOC101928615///fibronectin type III domain containing 3B
209641_s_at	4e-09	1.36e-09	7.22223	10.8487	1.67	ABCC3	ATP binding cassette subfamily C member 3
201540_at	4.02e-09	1.37e-09	7.22089	10.8436	1.51	FHL1	four and a half LIM domains 1
215193_x_at	4.02e-09	1.37e-09	7.22076	10.8431	2.08	LOC101060835///LOC100996809///HLA-DRB4///HLA-DRB3///HLA-DRB1///HLA-DQB1	HLA class II histocompatibility antigen, DQ beta 1 chain-like///HLA class II histocompatibility antigen, DRB1-10 beta chain-like///major histocompatibility complex, class II, DR beta 4///major histocompatibility complex, class II, DR beta 3///major histocompatibility complex, class II, DR beta 1///major histocompatibility complex, class II, DQ beta 1
212488_at	4.36e-09	1.49e-09	7.1985	10.7579	1.72	COL5A1	collagen type V alpha 1 chain
209652_s_at	4.44e-09	1.52e-09	7.19309	10.7372	2.4	PGF	placental growth factor
203085_s_at	5.23e-09	1.81e-09	7.14784	10.564	2.31	TGFB1	transforming growth factor beta 1
222281_s_at	5.85e-09	2.04e-09	7.11664	10.4447	1.81	LOC101929219///LOC100505650///C1orf186	uncharacterized LOC101929219///uncharacterized LOC100505650///chromosome 1 open reading frame 186
208308_s_at	6.61e-09	2.32e-09	7.0828	10.3153	1.54	GPI	glucose-6-phosphate isomerase
209803_s_at	6.64e-09	2.33e-09	7.0817	10.311	1.64	PHLDA2	pleckstrin homology like domain family A member 2
201291_s_at	6.68e-09	2.35e-09	7.08	10.3045	1.59	TOP2A	topoisomerase (DNA) II alpha
221269_s_at	6.76e-09	2.37e-09	7.07704	10.2932	1.67	SH3BGRL3	SH3 domain binding glutamate rich protein like 3

## Sheet: Common elements 
Supplementary Table 6. The detailed gene expression of GSE781, GSE15641 and GSE73121.
Common elements in GSE781 GSE15641 GSE7321 :
TNFAIP6
LOX
INHBB
MCAM
PTRF
ISG15
AXL
IFI16
SH3BGRL3
PLK2
